# Supplementary material for: Proteome Characterization of Leaves in Common Bean
Source: Proteomes. 2015 Aug 18;3(3):236–48. doi: 10.3390/proteomes3030236 (PMC5217379; doi:10.3390/proteomes3030236)
Supplement: Supplementary File 1 [file proteomes-03-00236-s001.xlsx]

## Sheet: Supplementary Table S1 
Supplementary Table 1. Proteins Identifications.
Protein Name	Accession Number	Molecular Weight	Exlusive Peptide Count						Percent Sequence Coverage
			A195_1	A195_2	A195_3	Sac_1	Sac_2	Sac_3	A195_1	A195_2	A195_3	Sac_1	Sac_2	Sac_3
2 iron, 2 sulfur cluster binding	Phvul.004G125800.1|PACid:27157790	12 kDa	2	5	2	6	5	3	0.27	0.532	0.27	0.541	0.505	0.387
26S proteasome regulatory complex, non-ATPase subcomplex, Rpn2/Psmd1 subunit	Phvul.002G324700.1|PACid:27170952	109 kDa	0	0	2	2	0	2	0	0	0.0239	0.0239	0	0.0239
2-cysteine peroxiredoxin B	Phvul.001G194100.1|PACid:27163227 (+1)	29 kDa	9	8	9	5	9	9	0.485	0.454	0.485	0.377	0.485	0.485
2Fe-2S ferredoxin-like superfamily protein	Phvul.002G045400.1|PACid:27168785	16 kDa	2	2	2	5	4	4	0.247	0.247	0.247	0.616	0.5	0.5
2Fe-2S ferredoxin-like superfamily protein	Phvul.006G216800.1|PACid:27167359	16 kDa	0	0	0	0	2	0	0	0	0	0	0.243	0
2Fe-2S ferredoxin-like superfamily protein	Phvul.006G216700.1|PACid:27165760	22 kDa	2	0	2	3	3	0	0.181	0	0.171	0.181	0.171	0
2-oxoacid dehydrogenases acyltransferase family protein	Phvul.007G026300.1|PACid:27161528	48 kDa	0	2	2	0	0	0	0	0.0948	0.0948	0	0	0
2-phosphoglycolate phosphatase 1	Phvul.008G051700.1|PACid:27154549	41 kDa	0	0	0	0	0	2	0	0	0	0	0	0.101
2UnknownS proteasome alpha subunit E2	Phvul.007G021000.1|PACid:27159393	26 kDa	4	3	4	0	3	2	0.338	0.19	0.215	0	0.19	0.105
31-kDa RNA binding protein	Phvul.009G171500.1|PACid:27147461	33 kDa	7	6	8	8	8	5	0.296	0.266	0.296	0.359	0.203	0.163
3UnknownS ribosomal protein, putative	Phvul.009G045100.1|PACid:27147476	37 kDa	2	2	2	0	2	2	0.155	0.155	0.127	0	0.127	0.121
4Unknowns ribosomal protein SA B	Phvul.010G125100.1|PACid:27140930 (+2)	34 kDa	6	2	7	2	2	4	0.256	0.0673	0.292	0.0962	0.0673	0.163
6UnknownS acidic ribosomal protein family	Phvul.009G045800.1|PACid:27146569	11 kDa	0	0	2	2	2	2	0	0	0.482	0.482	0.482	0.482
6UnknownS acidic ribosomal protein family	Phvul.005G104700.1|PACid:27148874 (+1)	16 kDa	0	0	0	2	0	0	0	0	0	0.351	0	0
6UnknownS acidic ribosomal protein family	Phvul.007G230200.1|PACid:27159091	11 kDa	5	0	5	2	2	5	0.605	0	0.605	0.298	0.298	0.605
6UnknownS acidic ribosomal protein family	Phvul.001G188200.1|PACid:27162099	23 kDa	3	2	4	5	3	4	0.301	0.16	0.301	0.311	0.16	0.311
6UnknownS acidic ribosomal protein family	Phvul.005G126000.1|PACid:27149505	11 kDa	2	0	5	2	2	4	0.295	0	0.42	0.295	0.384	0.402
acetyl Co-enzyme a carboxylase biotin carboxylase subunit	Phvul.002G302900.1|PACid:27167697	58 kDa	3	2	3	3	3	3	0.0813	0.0473	0.0813	0.0813	0.0813	0.0813
Aconitase/3-isopropylmalate dehydratase protein	Phvul.010G153800.1|PACid:27140298	27 kDa	2	3	3	0	2	2	0.147	0.198	0.198	0	0.147	0.147
actin depolymerizing factor 3	Phvul.006G132700.1|PACid:27165655	16 kDa	0	0	2	0	0	0	0	0	0.237	0	0	0
actin-11	Phvul.008G011000.1|PACid:27155877	42 kDa	2	0	2	0	0	0	0.3	0	0.223	0	0	0
actin-11	Phvul.004G001000.1|PACid:27156550	42 kDa	6	4	4	2	2	3	0.257	0.18	0.18	0.0584	0.0584	0.106
acyl carrier protein 4	Phvul.002G282800.1|PACid:27167585	18 kDa	4	5	3	4	4	4	0.202	0.276	0.166	0.202	0.202	0.202
Acyl transferase/acyl hydrolase/lysophospholipase superfamily protein	Phvul.010G047000.1|PACid:27141326	46 kDa	4	0	8	3	3	7	0.102	0	0.211	0.0735	0.0806	0.211
acyl-CoA-binding protein 6	Phvul.002G127700.1|PACid:27168742	10 kDa	3	4	4	5	4	3	0.478	0.611	0.611	0.611	0.611	0.478
adenine phosphoribosyl transferase 1	Phvul.009G070900.1|PACid:27146925	27 kDa	5	3	5	0	2	5	0.329	0.203	0.329	0	0.142	0.329
adenosine kinase 2	Phvul.007G150300.1|PACid:27160112	37 kDa	2	0	3	0	0	0	0.0909	0	0.152	0	0	0
adenylate kinase 1	Phvul.003G209400.1|PACid:27143713	27 kDa	3	2	2	4	2	2	0.136	0.0992	0.0992	0.165	0.0992	0.0992
adenylate kinase family protein	Phvul.009G208900.1|PACid:27147986	67 kDa	0	2	0	0	0	0	0	0.0335	0	0	0	0
ADP glucose pyrophosphorylase 1	Phvul.008G284000.1|PACid:27154630	56 kDa	3	2	0	0	0	0	0.0563	0.0388	0	0	0	0
ADP-ribosylation factor A1F	Phvul.001G215400.1|PACid:27162755 (+4)	21 kDa	2	0	5	0	2	3	0.133	0	0.47	0	0.155	0.232
alanine:glyoxylate aminotransferase	Phvul.006G029100.1|PACid:27165422 (+1)	44 kDa	2	4	0	2	0	0	0.0823	0.145	0	0.0723	0	0
alanine-2-oxoglutarate aminotransferase 2	Phvul.002G150800.1|PACid:27168605	54 kDa	0	3	0	0	0	0	0	0.0915	0	0	0	0
aldehyde dehydrogenase 11A3	Phvul.003G157200.1|PACid:27144178	53 kDa	0	2	0	0	0	2	0	0.0523	0	0	0	0.0584
Aldolase superfamily protein	Phvul.008G189200.1|PACid:27156044	39 kDa	9	7	8	4	7	11	0.282	0.154	0.282	0.134	0.209	0.285
Aldolase superfamily protein	Phvul.009G127100.1|PACid:27146420	45 kDa	4	4	4	4	5	4	0.104	0.104	0.104	0.104	0.153	0.104
Aldolase superfamily protein	Phvul.008G282000.1|PACid:27155233	39 kDa	3	5	2	0	6	3	0.168	0.272	0.168	0	0.35	0.227
Aldolase-type TIM barrel family protein	Phvul.008G003600.1|PACid:27156266	48 kDa	0	0	2	0	2	2	0	0	0.0677	0	0.0677	0.0677
Aldolase-type TIM barrel family protein	Phvul.005G051800.1|PACid:27150154	41 kDa	3	7	2	5	4	2	0.111	0.264	0.0755	0.17	0.124	0.0755
Aldolase-type TIM barrel family protein	Phvul.006G171100.1|PACid:27166056	33 kDa	2	0	3	0	3	2	0.0929	0	0.0994	0	0.131	0.0962
aleurain-like protease	Phvul.009G227100.1|PACid:27148097	39 kDa	4	6	5	5	5	5	0.273	0.315	0.273	0.315	0.315	0.298
allantoinase	Phvul.006G186800.1|PACid:27164938	57 kDa	0	0	0	5	3	2	0	0	0	0.193	0.107	0.0527
allene oxide cyclase 4	Phvul.008G020200.1|PACid:27155432	27 kDa	0	0	0	2	0	2	0	0	0	0.108	0	0.096
alpha-xylosidase 1	Phvul.003G035400.1|PACid:27143076	103 kDa	3	4	5	4	4	4	0.0324	0.0324	0.0346	0.0259	0.0259	0.0346
Ankyrin repeat family protein	Phvul.006G038600.1|PACid:27166813	19 kDa	0	2	2	3	2	3	0	0.203	0.186	0.297	0.186	0.297
ankyrin repeat-containing 2B	Phvul.005G006400.1|PACid:27149778	37 kDa	4	3	6	5	4	5	0.124	0.098	0.164	0.167	0.101	0.161
ARF-GAP domain 8	Phvul.003G285000.1|PACid:27143812	43 kDa	0	0	3	2	0	3	0	0	0.132	0.0546	0	0.132
ascorbate peroxidase 1	Phvul.011G071300.1|PACid:27150621	27 kDa	8	9	13	8	8	11	0.448	0.492	0.6	0.444	0.484	0.504
ascorbate peroxidase 4	Phvul.008G176700.1|PACid:27156217	38 kDa	4	7	5	0	3	4	0.21	0.329	0.274	0	0.156	0.21
ATP citrate lyase (ACL) family protein	Phvul.007G190800.1|PACid:27160158	45 kDa	0	0	3	0	0	0	0	0	0.0853	0	0	0
ATP synthase alpha/beta family protein	Phvul.007G034800.1|PACid:27160532	60 kDa	6	9	3	0	4	4	0.156	0.26	0.0717	0	0.104	0.095
ATP synthase D chain, mitochondrial	Phvul.007G092100.1|PACid:27159460	20 kDa	3	3	7	5	3	6	0.22	0.22	0.345	0.351	0.196	0.327
ATP synthase delta-subunit gene	Phvul.003G211100.1|PACid:27143051	27 kDa	10	10	9	4	8	7	0.445	0.486	0.409	0.259	0.385	0.377
ATP synthase epsilon chain	Phvul.010G031400.1|PACid:27141616	8 kDa	3	5	4	4	5	5	0.68	0.693	0.693	0.693	0.693	0.693
ATPase, AAA-type, CDC48 protein	Phvul.007G149400.1|PACid:27158515 (+1)	90 kDa	2	0	0	0	0	0	0.0222	0	0	0	0	0
ATPase, F1 complex, delta/epsilon subunit	Phvul.010G042900.1|PACid:27141258	21 kDa	0	0	3	0	0	0	0	0	0.228	0	0	0
ATPase, F1 complex, gamma subunit protein	Phvul.006G149700.1|PACid:27166321 (+1)	41 kDa	3	4	0	2	3	0	0.107	0.211	0	0.0773	0.107	0
ATPase, FUnknown complex, subunit B/B\', bacterial/chloroplast	Phvul.009G092400.1|PACid:27147636	51 kDa	3	4	3	2	3	3	0.0661	0.104	0.0925	0.0661	0.0925	0.0661
ATPase, V1 complex, subunit B protein	Phvul.008G050000.1|PACid:27155571	54 kDa	4	0	3	0	2	3	0.162	0	0.145	0	0.117	0.145
ATP-dependent caseinolytic (Clp) protease/crotonase family protein	Phvul.002G314900.1|PACid:27169398	45 kDa	2	0	0	0	0	0	0.0459	0	0	0	0	0
Bacterial sec-independent translocation protein mttA/Hcf1Unknown6	Phvul.007G073200.1|PACid:27158580	26 kDa	3	2	4	4	4	2	0.203	0.108	0.257	0.224	0.224	0.166
basic chitinase	Phvul.009G116600.1|PACid:27147911	35 kDa	8	2	9	0	0	9	0.394	0.11	0.394	0	0	0.495
basic chitinase	Phvul.009G116700.1|PACid:27148034	38 kDa	5	2	5	0	0	4	0.315	0.0888	0.332	0	0	0.301
basic transcription factor 3	Phvul.011G041900.1|PACid:27150706	17 kDa	2	0	5	0	2	2	0.162	0	0.431	0	0.162	0.162
beta-1,3-glucanase 1	Phvul.001G128500.1|PACid:27163215	37 kDa	3	0	3	0	0	0	0.0923	0	0.104	0	0	0
beta-amylase 5	Phvul.011G107700.1|PACid:27150841	56 kDa	4	0	3	3	5	0	0.159	0	0.107	0.123	0.203	0
beta-D-xylosidase 4	Phvul.006G208200.1|PACid:27167166	84 kDa	3	3	3	0	2	4	0.0735	0.0761	0.0555	0	0.0555	0.0735
beta-hexosaminidase 1	Phvul.008G015400.1|PACid:27154056	62 kDa	3	0	2	0	0	3	0.0747	0	0.0455	0	0	0.0729
Bifunctional inhibitor/lipid-transfer protein/seed storage 2S albumin superfamily protein	Phvul.006G207500.1|PACid:27165626	18 kDa	2	2	2	0	0	2	0.137	0.137	0.137	0	0	0.137
Bifunctional inhibitor/lipid-transfer protein/seed storage 2S albumin superfamily protein	Phvul.008G008200.1|PACid:27154166	10 kDa	0	0	0	2	0	0	0	0	0	0.276	0	0
Bifunctional inhibitor/lipid-transfer protein/seed storage 2S albumin superfamily protein	Phvul.002G234400.1|PACid:27171155	20 kDa	0	0	2	0	0	2	0	0	0.209	0	0	0.0749
Bifunctional inhibitor/lipid-transfer protein/seed storage 2S albumin superfamily protein	Phvul.001G050300.1|PACid:27164014	12 kDa	3	3	3	4	3	3	0.446	0.446	0.446	0.628	0.446	0.446
biotin carboxyl carrier protein 2	Phvul.004G035000.2|PACid:27157060	28 kDa	0	0	0	0	0	2	0	0	0	0	0	0.124
biotin/lipoyl attachment domain-containing protein	Phvul.001G247000.1|PACid:27162259	31 kDa	2	0	2	2	2	2	0.17	0	0.17	0.17	0.17	0.17
blue-copper-binding protein	Phvul.003G166500.1|PACid:27142914	18 kDa	0	0	2	0	0	0	0	0	0.179	0	0	0
BolA-like family protein	Phvul.007G281100.1|PACid:27159858 (+1)	18 kDa	2	2	2	2	2	2	0.193	0.193	0.193	0.193	0.193	0.193
calcium sensing receptor	Phvul.003G180100.1|PACid:27143766	41 kDa	2	5	2	3	0	3	0.12	0.23	0.074	0.148	0	0.148
Calcium-binding EF-hand family protein	Phvul.002G060300.1|PACid:27167863	16 kDa	2	3	4	3	3	4	0.19	0.347	0.435	0.347	0.347	0.408
Calcium-binding EF-hand family protein	Phvul.002G329300.1|PACid:27167898	19 kDa	0	0	2	0	0	2	0	0	0.11	0	0	0.209
Calcium-dependent lipid-binding (CaLB domain) family protein	Phvul.004G110400.1|PACid:27157817	33 kDa	0	0	2	0	0	0	0	0	0.0909	0	0	0
Calcium-dependent lipid-binding (CaLB domain) family protein	Phvul.010G093800.1|PACid:27139987	17 kDa	2	2	4	0	2	2	0.218	0.218	0.483	0	0.218	0.218
calmodulin 5	Phvul.001G102700.1|PACid:27162315 (+3)	17 kDa	0	0	2	0	0	0	0	0	0.221	0	0	0
calreticulin 1a	Phvul.007G200800.1|PACid:27161178	48 kDa	7	3	10	0	4	6	0.226	0.129	0.362	0	0.152	0.205
cAMP-regulated phosphoprotein 19-related protein	Phvul.005G054800.1|PACid:27149192	13 kDa	0	0	2	4	0	0	0	0	0.195	0.39	0	0
CAP (Cysteine-rich secretory proteins, Antigen 5, and Pathogenesis-related 1 protein) superfamily protein	Phvul.006G197200.1|PACid:27167139	17 kDa	2	0	5	0	0	3	0.283	0	0.667	0	0	0.358
carbonic anhydrase 1	Phvul.004G013500.1|PACid:27157066 (+4)	37 kDa	11	14	11	13	12	12	0.434	0.522	0.49	0.545	0.504	0.504
carbonic anhydrase 2	Phvul.002G071200.1|PACid:27169236 (+1)	30 kDa	0	0	0	0	2	0	0	0	0	0	0.126	0
catalase 2	Phvul.009G011100.1|PACid:27146649	57 kDa	3	2	2	0	2	2	0.0833	0.0488	0.0488	0	0.0488	0.0488
CAX interacting protein 1	Phvul.008G055800.1|PACid:27153099	20 kDa	2	2	2	2	2	2	0.162	0.162	0.162	0.162	0.162	0.162
CCR-like	Phvul.001G085200.1|PACid:27164772	15 kDa	0	3	0	0	0	0	0	0.281	0	0	0	0
Chaperone protein htpG family protein	Phvul.001G005200.1|PACid:27163885	94 kDa	4	0	2	0	0	2	0.0747	0	0.0379	0	0	0.0306
chaperonin 1Unknown	Phvul.001G120500.1|PACid:27164304	11 kDa	0	3	3	4	2	3	0	0.454	0.454	0.485	0.216	0.454
chaperonin 2Unknown	Phvul.003G128900.1|PACid:27144657	27 kDa	3	0	3	3	3	3	0.124	0	0.124	0.124	0.124	0.124
chaperonin 2Unknown	Phvul.009G224900.1|PACid:27147885	26 kDa	6	7	7	7	6	6	0.273	0.305	0.361	0.305	0.273	0.273
chaperonin-6Unknownalpha	Phvul.011G082600.1|PACid:27152566	62 kDa	19	15	19	9	16	14	0.445	0.387	0.428	0.197	0.382	0.372
chitinase A	Phvul.004G101500.1|PACid:27158091	32 kDa	2	0	0	0	0	3	0.0337	0	0	0	0	0.0875
chitinase A	Phvul.011G167300.1|PACid:27150829	31 kDa	3	0	4	2	2	2	0.222	0	0.232	0.138	0.138	0.138
chlorophyll A/B binding protein 1	Phvul.004G091600.1|PACid:27157179 (+1)	28 kDa	4	3	4	2	3	3	0.583	0.436	0.432	0.258	0.367	0.367
chlorophyll A/B binding protein 1	Phvul.002G196400.1|PACid:27168445	28 kDa	10	8	7	3	7	7	0.65	0.578	0.517	0.118	0.574	0.517
chloroplast heat shock protein 7Unknown-2	Phvul.006G219500.1|PACid:27166164	74 kDa	0	0	0	2	0	0	0	0	0	0.205	0	0
chloroplast heat shock protein 7Unknown-2	Phvul.006G219600.1|PACid:27166564	74 kDa	13	20	21	12	17	14	0.232	0.374	0.345	0.242	0.331	0.247
chloroplast RNA binding	Phvul.001G223800.1|PACid:27161823	42 kDa	8	13	9	6	12	9	0.275	0.431	0.339	0.299	0.394	0.352
chloroplast RNA-binding protein 31B	Phvul.003G206700.1|PACid:27144868	34 kDa	7	7	6	6	7	8	0.341	0.279	0.279	0.285	0.334	0.341
chloroplast RNA-binding protein 33	Phvul.001G196700.1|PACid:27162780	34 kDa	3	2	3	0	4	2	0.12	0.123	0.12	0	0.183	0.107
chloroplast signal recognition particle component (CAO)	Phvul.011G025300.1|PACid:27151403	46 kDa	2	0	0	0	0	2	0.0731	0	0	0	0	0.0731
chloroplast stem-loop binding protein of 41 kDa	Phvul.007G172100.1|PACid:27158479	44 kDa	2	3	0	0	2	0	0.0746	0.117	0	0	0.0746	0
chloroplast thylakoid lumen protein	Phvul.003G166300.1|PACid:27142618	35 kDa	2	6	2	0	2	2	0.114	0.288	0.114	0	0.114	0.114
chloroplastic acetylcoenzyme A carboxylase 1	Phvul.008G053000.1|PACid:27156321	28 kDa	3	3	3	2	2	4	0.267	0.267	0.267	0.134	0.134	0.267
chloroplastic drought-induced stress protein of 32 kD	Phvul.001G002100.1|PACid:27163238	34 kDa	0	2	0	0	0	0	0	0.06	0	0	0	0
chloroplastic lipocalin	Phvul.008G265400.1|PACid:27153495	37 kDa	2	2	4	2	2	2	0.12	0.12	0.178	0.12	0.12	0.12
Clathrin light chain protein	Phvul.002G227200.1|PACid:27169935	35 kDa	0	0	2	0	0	0	0	0	0.0839	0	0	0
CLP protease P4	Phvul.002G128500.1|PACid:27168214	33 kDa	2	0	0	0	2	0	0.121	0	0	0	0.0425	0
CLPC homologue 1	Phvul.009G162100.1|PACid:27145996	102 kDa	4	0	3	2	4	0	0.0521	0	0.038	0.0249	0.064	0
Cobalamin-independent synthase family protein	Phvul.001G113800.1|PACid:27163218	84 kDa	14	4	14	5	7	6	0.286	0.0682	0.3	0.104	0.153	0.135
Co-chaperone GrpE family protein	Phvul.009G196500.1|PACid:27145485	33 kDa	0	0	0	0	0	2	0	0	0	0	0	0.119
Co-chaperone GrpE family protein	Phvul.001G108000.1|PACid:27164859	37 kDa	5	2	7	0	4	6	0.177	0.108	0.288	0	0.141	0.231
cold shock domain protein 1	Phvul.003G263300.1|PACid:27144039	24 kDa	0	0	0	3	0	2	0	0	0	0.186	0	0.126
cold, circadian rhythm, and rna binding 2	Phvul.011G045000.1|PACid:27151288	17 kDa	4	4	4	10	5	4	0.282	0.282	0.282	0.609	0.282	0.333
cold, circadian rhythm, and rna binding 2	Phvul.009G023700.1|PACid:27146551	18 kDa	2	4	2	5	4	5	0.173	0.308	0.173	0.422	0.422	0.422
cold-regulated 47	Phvul.009G004400.1|PACid:27147548	23 kDa	2	0	4	2	0	3	0.163	0	0.238	0.163	0	0.163
Concanavalin A-like lectin protein kinase family protein	Phvul.007G070300.1|PACid:27160454	33 kDa	0	2	0	3	2	0	0	0.107	0	0.147	0.107	0
copper ion binding;cobalt ion binding;zinc ion binding	Phvul.002G265700.1|PACid:27169903	28 kDa	3	3	4	4	3	3	0.191	0.158	0.187	0.191	0.191	0.183
copper/zinc superoxide dismutase 1	Phvul.006G097000.1|PACid:27167484	15 kDa	3	3	4	4	4	3	0.434	0.434	0.434	0.434	0.434	0.434
copper/zinc superoxide dismutase 2	Phvul.011G086300.1|PACid:27152804	21 kDa	7	7	7	9	9	8	0.569	0.569	0.539	0.735	0.735	0.569
Coproporphyrinogen III oxidase	Phvul.008G289900.1|PACid:27155337	44 kDa	2	0	0	0	2	0	0.0641	0	0	0	0.0641	0
Cox19-like CHCH family protein	Phvul.002G214000.1|PACid:27170329	14 kDa	0	0	0	0	0	2	0	0	0	0	0	0.331
CP12 domain-containing protein 2	Phvul.001G212900.1|PACid:27164757	14 kDa	3	3	3	3	3	3	0.5	0.5	0.5	0.5	0.5	0.5
CP12 domain-containing protein 2	Phvul.007G214200.1|PACid:27161496	14 kDa	2	3	4	6	3	5	0.328	0.435	0.534	0.534	0.435	0.534
cyclophilin 2Unknown-2	Phvul.007G001100.1|PACid:27159556	29 kDa	3	6	4	5	5	3	0.17	0.268	0.196	0.242	0.211	0.17
cyclophilin 38	Phvul.004G017000.1|PACid:27158411	49 kDa	6	7	8	6	6	5	0.222	0.234	0.234	0.204	0.196	0.175
cyclophilin 5	Phvul.006G068200.1|PACid:27167165	22 kDa	2	0	0	0	0	2	0.0637	0	0	0	0	0.0637
Cyclophilin-like peptidyl-prolyl cis-trans isomerase family protein	Phvul.011G148100.1|PACid:27152035	46 kDa	3	7	3	3	2	2	0.13	0.237	0.112	0.158	0.105	0.0581
Cyclophilin-like peptidyl-prolyl cis-trans isomerase family protein	Phvul.003G178500.1|PACid:27144974	42 kDa	5	7	3	4	4	3	0.197	0.225	0.142	0.168	0.148	0.119
Cyclophilin-like peptidyl-prolyl cis-trans isomerase family protein	Phvul.002G088300.1|PACid:27171333	25 kDa	0	0	3	0	0	0	0	0	0.226	0	0	0
Cystathionine beta-synthase (CBS) family protein	Phvul.002G016800.1|PACid:27170592	25 kDa	0	2	0	0	0	3	0	0.0742	0	0	0	0.118
cystatin B	Phvul.006G018600.1|PACid:27166305	11 kDa	2	2	2	0	2	3	0.258	0.258	0.289	0	0.289	0.381
Cysteine proteinases superfamily protein	Phvul.001G220100.1|PACid:27164419 (+1)	40 kDa	0	0	2	2	0	2	0	0	0.0756	0.0756	0	0.0756
Cysteine proteinases superfamily protein	Phvul.006G176800.1|PACid:27165555	16 kDa	0	0	3	0	0	0	0	0	0.279	0	0	0
Cysteine proteinases superfamily protein	Phvul.003G130600.1|PACid:27142905	23 kDa	0	0	3	0	2	2	0	0	0.204	0	0.139	0.139
Cytochrome c	Phvul.002G098700.1|PACid:27171338	19 kDa	0	0	0	2	3	0	0	0	0	0.169	0.233	0
cytochrome C oxidase 6B	Phvul.008G176600.1|PACid:27154052	20 kDa	3	3	4	4	2	3	0.192	0.192	0.254	0.226	0.124	0.192
Cytosol aminopeptidase family protein	Phvul.009G195000.1|PACid:27146348	60 kDa	3	7	0	0	5	3	0.0832	0.218	0	0	0.146	0.0676
DC1 domain-containing protein	Phvul.003G061100.1|PACid:27143600	64 kDa	2	0	2	0	0	0	0.0455	0	0.0438	0	0	0
DegP protease 1	Phvul.004G013600.1|PACid:27156458	45 kDa	2	8	0	4	4	3	0.0542	0.243	0	0.0967	0.0991	0.0731
dehydratase family	Phvul.006G152700.1|PACid:27164979	64 kDa	0	0	4	0	0	2	0	0	0.0915	0	0	0.0433
dehydroascorbate reductase 1	Phvul.001G230400.1|PACid:27163271	29 kDa	0	2	4	3	0	3	0	0.179	0.282	0.172	0	0.179
dehydroascorbate reductase 2	Phvul.007G009800.1|PACid:27158987	23 kDa	4	3	5	4	4	7	0.291	0.169	0.324	0.282	0.244	0.531
Dihydrolipoamide succinyltransferase	Phvul.008G269300.1|PACid:27153844	50 kDa	4	3	3	2	2	3	0.0946	0.0817	0.0817	0.0473	0.0473	0.0817
D-mannose binding lectin protein with Apple-like carbohydrate-binding domain	Phvul.005G066000.1|PACid:27150055	50 kDa	2	2	2	2	2	2	0.0856	0.0856	0.0856	0.0856	0.0856	0.0856
DNAJ heat shock family protein	Phvul.002G257300.1|PACid:27170908 (+1)	47 kDa	0	0	0	4	2	0	0	0	0	0.107	0.0479	0
DnaJ/Hsp4Unknown cysteine-rich domain superfamily protein	Phvul.001G007500.1|PACid:27162776	17 kDa	0	0	3	2	2	3	0	0	0.39	0.24	0.24	0.247
DnaJ/Hsp4Unknown cysteine-rich domain superfamily protein	Phvul.007G006200.1|PACid:27159241	19 kDa	0	0	0	2	0	0	0	0	0	0.174	0	0
DnaJ/Hsp4Unknown cysteine-rich domain superfamily protein	Phvul.003G164500.1|PACid:27144762	14 kDa	2	0	2	3	4	3	0.182	0	0.182	0.326	0.492	0.326
Double Clp-N motif protein	Phvul.002G151400.1|PACid:27170113	26 kDa	0	0	0	0	2	0	0	0	0	0	0.158	0
double-stranded DNA-binding family protein	Phvul.002G197500.1|PACid:27168531	15 kDa	0	0	2	0	0	0	0	0	0.172	0	0	0
DPP6 N-terminal domain-like protein	Phvul.009G128300.1|PACid:27146137	76 kDa	3	4	2	3	2	2	0.0673	0.0805	0.0512	0.0673	0.0425	0.0425
D-ribulose-5-phosphate-3-epimerase	Phvul.003G188800.1|PACid:27143201	30 kDa	2	5	2	2	2	2	0.125	0.218	0.125	0.161	0.0929	0.0929
early nodulin-like protein 1	Phvul.005G073200.1|PACid:27149914	46 kDa	2	2	3	0	0	2	0.0619	0.0619	0.0642	0	0	0.0619
elongation factor P (EF-P) family protein	Phvul.008G082900.1|PACid:27154982	26 kDa	0	2	0	0	0	0	0	0.089	0	0	0	0
elongation factor Ts family protein	Phvul.004G168100.1|PACid:27157476	122 kDa	4	5	6	5	8	4	0.0511	0.0785	0.0767	0.0653	0.109	0.0653
Embryo-specific protein 3, (ATS3)	Phvul.005G177100.1|PACid:27149941	20 kDa	0	0	0	2	2	3	0	0	0	0.225	0.225	0.41
endoribonuclease L-PSP family protein	Phvul.006G043400.1|PACid:27166401	20 kDa	2	2	0	2	0	2	0.139	0.139	0	0.182	0	0.139
Enolase	Phvul.001G186100.1|PACid:27162935	48 kDa	14	12	13	8	9	13	0.489	0.471	0.468	0.338	0.363	0.471
ethylene-forming enzyme	Phvul.008G214200.1|PACid:27155644	36 kDa	4	0	0	0	0	2	0.254	0	0	0	0	0.14
Eukaryotic aspartyl protease family protein	Phvul.009G144100.1|PACid:27146478	47 kDa	0	0	2	0	4	4	0	0	0.112	0	0.177	0.156
Eukaryotic aspartyl protease family protein	Phvul.011G206100.1|PACid:27151368	47 kDa	0	0	0	0	0	4	0	0	0	0	0	0.116
eukaryotic elongation factor 5A-1	Phvul.009G184600.1|PACid:27146450	18 kDa	2	2	5	2	2	2	0.106	0.106	0.381	0.106	0.112	0.106
eukaryotic translation initiation factor 2 beta subunit	Phvul.008G246100.1|PACid:27156325	30 kDa	0	0	2	0	0	0	0	0	0.116	0	0	0
eukaryotic translation initiation factor 4A1	Phvul.003G134800.1|PACid:27142123 (+1)	47 kDa	3	0	0	0	0	0	0.102	0	0	0	0	0
evolutionarily conserved C-terminal region 2	Phvul.002G247000.1|PACid:27168522	74 kDa	0	0	0	0	0	2	0	0	0	0	0	0.0665
expansin-like B1	Phvul.003G228000.1|PACid:27144361	27 kDa	0	0	2	0	0	2	0	0	0.112	0	0	0.112
FAD/NAD(P)-binding oxidoreductase	Phvul.007G035000.1|PACid:27159037	31 kDa	0	2	0	0	0	2	0	0.128	0	0	0	0.128
FASCICLIN-like arabinogalactan 1	Phvul.006G057400.1|PACid:27165543	44 kDa	0	0	2	2	2	2	0	0	0.162	0.162	0.162	0.162
FASCICLIN-like arabinogalactan 2	Phvul.008G288800.1|PACid:27153618	43 kDa	4	4	5	7	7	6	0.216	0.216	0.243	0.268	0.268	0.261
FASCICLIN-like arabinogalactan-protein 1Unknown	Phvul.008G075000.1|PACid:27155369	43 kDa	2	0	0	4	2	5	0.0859	0	0	0.177	0.0692	0.208
FASCICLIN-like arabinoogalactan 9	Phvul.005G099500.1|PACid:27149459	26 kDa	0	3	0	2	2	3	0	0.178	0	0.142	0.142	0.186
ferredoxin/thioredoxin reductase subunit A (variable subunit) 2	Phvul.004G000400.1|PACid:27156444	17 kDa	0	3	0	3	2	0	0	0.242	0	0.242	0.176	0
ferredoxin-NADP(+)-oxidoreductase 1	Phvul.003G263200.1|PACid:27142088	41 kDa	4	4	3	2	5	3	0.218	0.285	0.185	0.127	0.331	0.16
ferredoxin-NADP(+)-oxidoreductase 2	Phvul.002G108000.1|PACid:27167711	41 kDa	5	8	4	4	7	6	0.166	0.301	0.133	0.157	0.265	0.193
fibrillin	Phvul.006G145100.1|PACid:27165511	34 kDa	0	3	0	0	2	0	0	0.165	0	0	0.103	0
FK5Unknown6- and rapamycin-binding protein 15 kD-2	Phvul.010G024400.1|PACid:27140309	17 kDa	0	0	2	2	0	2	0	0	0.194	0.194	0	0.194
FK5Unknown6-binding protein 13	Phvul.002G187500.1|PACid:27167853	23 kDa	0	0	0	2	0	2	0	0	0	0.147	0	0.147
FK5Unknown6-binding protein 16-2	Phvul.002G262400.1|PACid:27169155 (+2)	23 kDa	0	2	0	0	0	0	0	0.198	0	0	0	0
FKBP-like peptidyl-prolyl cis-trans isomerase family protein	Phvul.011G051700.1|PACid:27151439	29 kDa	0	2	0	2	3	2	0	0.18	0	0.18	0.301	0.18
FKBP-like peptidyl-prolyl cis-trans isomerase family protein	Phvul.008G009400.1|PACid:27154683	30 kDa	0	4	2	4	3	2	0	0.19	0.0803	0.146	0.146	0.12
FKBP-like peptidyl-prolyl cis-trans isomerase family protein	Phvul.007G225600.1|PACid:27158652	25 kDa	0	2	0	0	0	0	0	0.151	0	0	0	0
fructose-bisphosphate aldolase 2	Phvul.011G039100.1|PACid:27152068	43 kDa	15	18	12	10	13	13	0.417	0.48	0.327	0.302	0.44	0.304
FtsH extracellular protease family	Phvul.002G190900.1|PACid:27168562	75 kDa	0	4	0	0	3	0	0	0.0935	0	0	0.0935	0
gamma-glutamyl hydrolase 1	Phvul.005G080600.1|PACid:27148830	38 kDa	6	2	11	2	2	5	0.283	0.0925	0.517	0.0925	0.0925	0.208
GDP-D-mannose 3\',5\'-epimerase	Phvul.006G101600.1|PACid:27165995 (+1)	42 kDa	2	0	0	0	0	2	0.0638	0	0	0	0	0.0718
GDSL-like Lipase/Acylhydrolase superfamily protein	Phvul.006G169000.1|PACid:27165367	40 kDa	0	4	0	4	3	2	0	0.203	0	0.234	0.178	0.106
GDSL-like Lipase/Acylhydrolase superfamily protein	Phvul.006G169100.1|PACid:27166530	40 kDa	0	5	0	5	4	11	0	0.255	0	0.282	0.236	0.518
GDSL-like Lipase/Acylhydrolase superfamily protein	Phvul.006G169400.1|PACid:27165381	42 kDa	0	0	2	0	0	0	0	0	0.0763	0	0	0
GDSL-like Lipase/Acylhydrolase superfamily protein	Phvul.010G143600.1|PACid:27140498	41 kDa	0	0	2	0	0	2	0	0	0.0964	0	0	0.0964
GDSL-like Lipase/Acylhydrolase superfamily protein	Phvul.006G107300.1|PACid:27166126	40 kDa	11	8	11	9	8	9	0.402	0.415	0.467	0.445	0.402	0.396
general regulatory factor 2	Phvul.008G162500.1|PACid:27154327	29 kDa	4	0	0	0	0	0	0.207	0	0	0	0	0
general regulatory factor 3	Phvul.008G004300.1|PACid:27155699 (+1)	29 kDa	2	0	0	0	0	0	0.16	0	0	0	0	0
germin 3	Phvul.010G129600.1|PACid:27140606	22 kDa	0	0	0	2	3	0	0	0	0	0.131	0.189	0
germin 3	Phvul.009G227800.1|PACid:27146968	22 kDa	3	3	3	3	3	3	0.21	0.21	0.21	0.21	0.21	0.21
germin 3	Phvul.003G131400.1|PACid:27142835	21 kDa	3	2	2	2	3	2	0.25	0.207	0.207	0.207	0.212	0.207
germin-like protein 1	Phvul.010G129900.1|PACid:27140700	22 kDa	0	0	0	2	0	0	0	0	0	0.115	0	0
Glucose-methanol-choline (GMC) oxidoreductase family protein	Phvul.003G213000.1|PACid:27143592	63 kDa	2	0	0	0	2	2	0.0583	0	0	0	0.0583	0.0583
glutamate synthase 1	Phvul.001G123900.1|PACid:27162883	176 kDa	10	16	18	5	11	12	0.0907	0.145	0.145	0.0346	0.0975	0.106
glutamate-1-semialdehyde 2,1-aminomutase 2	Phvul.009G118500.1|PACid:27146116	50 kDa	5	2	2	2	2	3	0.166	0.0467	0.0531	0.0573	0.0531	0.0977
glutamine synthetase 2	Phvul.006G155800.1|PACid:27167409 (+1)	47 kDa	6	11	7	4	7	6	0.233	0.364	0.233	0.142	0.27	0.242
Glutaredoxin family protein	Phvul.007G155300.1|PACid:27158905	25 kDa	0	0	3	3	0	4	0	0	0.164	0.164	0	0.195
Glutaredoxin family protein	Phvul.008G156300.1|PACid:27154836	11 kDa	2	0	2	2	2	2	0.374	0	0.374	0.374	0.374	0.374
glutathione peroxidase 1	Phvul.001G041100.1|PACid:27162927	30 kDa	0	3	0	3	2	0	0	0.206	0	0.206	0.141	0
glutathione peroxidase 6	Phvul.002G288700.1|PACid:27169181	26 kDa	0	0	2	0	0	2	0	0	0.165	0	0	0.165
glutathione peroxidase 8	Phvul.002G157200.1|PACid:27170792	19 kDa	0	0	2	0	0	0	0	0	0.147	0	0	0
glutathione reductase	Phvul.007G177200.1|PACid:27159877	59 kDa	2	3	0	3	5	0	0.0455	0.116	0	0.102	0.158	0
Glutathione S-transferase, C-terminal-like;Translation elongation factor EF1B/ribosomal protein S6	Phvul.008G204800.1|PACid:27153650	24 kDa	4	4	5	0	4	4	0.226	0.217	0.276	0	0.195	0.244
glyceraldehyde 3-phosphate dehydrogenase A subunit	Phvul.001G098100.1|PACid:27162772	43 kDa	15	24	18	20	15	14	0.37	0.586	0.481	0.613	0.365	0.352
glyceraldehyde-3-phosphate dehydrogenase B subunit	Phvul.009G006600.1|PACid:27147865	48 kDa	11	15	12	10	11	8	0.326	0.499	0.439	0.37	0.364	0.297
glyceraldehyde-3-phosphate dehydrogenase C2	Phvul.009G168400.1|PACid:27146643	40 kDa	10	3	9	0	3	5	0.311	0.123	0.303	0	0.123	0.221
Glycine cleavage T-protein family	Phvul.003G080400.1|PACid:27143356	44 kDa	9	13	8	6	6	6	0.258	0.415	0.236	0.189	0.189	0.189
glycine decarboxylase P-protein 2	Phvul.001G035500.1|PACid:27163200	115 kDa	7	10	5	7	10	7	0.0791	0.142	0.0603	0.0866	0.116	0.105
glycine-rich protein 2B	Phvul.011G033900.1|PACid:27151676	19 kDa	5	4	7	6	5	7	0.515	0.395	0.53	0.525	0.515	0.53
glycine-rich protein 2B	Phvul.009G025100.1|PACid:27146047	19 kDa	2	2	3	5	3	3	0.196	0.196	0.211	0.423	0.206	0.314
glycine-rich RNA-binding protein 3	Phvul.003G184700.1|PACid:27144667	29 kDa	0	3	3	3	2	3	0	0.192	0.192	0.219	0.165	0.192
Glycosyl hydrolase superfamily protein	Phvul.009G256400.1|PACid:27145669 (+1)	41 kDa	9	6	10	0	0	8	0.385	0.27	0.458	0	0	0.38
Glycosyl hydrolase superfamily protein	Phvul.011G177000.1|PACid:27152442	37 kDa	8	2	10	0	0	9	0.377	0.0861	0.516	0	0	0.481
Glycosyl hydrolase superfamily protein	Phvul.011G077900.1|PACid:27152470	35 kDa	2	0	5	0	0	6	0.102	0	0.401	0	0	0.34
glycosylphosphatidylinositol-anchored lipid protein transfer 1	Phvul.001G262400.1|PACid:27162408	20 kDa	0	4	2	2	2	3	0	0.291	0.148	0.148	0.148	0.233
glyoxalase I homolog	Phvul.003G079700.1|PACid:27145095	32 kDa	2	0	2	0	2	0	0.104	0	0.104	0	0.0893	0
glyoxalase II 3	Phvul.005G062700.1|PACid:27150501	32 kDa	0	3	2	0	0	0	0	0.154	0.0956	0	0	0
Glyoxalase/Bleomycin resistance protein/Dioxygenase superfamily protein	Phvul.002G310700.1|PACid:27167538	39 kDa	3	3	4	4	2	2	0.134	0.134	0.165	0.165	0.0795	0.0795
glyoxylate reductase 1	Phvul.010G109500.1|PACid:27140222	31 kDa	0	0	0	0	2	0	0	0	0	0	0.134	0
Granulin repeat cysteine protease family protein	Phvul.001G024500.1|PACid:27162248	51 kDa	10	10	12	13	11	9	0.27	0.27	0.326	0.326	0.27	0.255
GroES-like family protein	Phvul.002G095400.1|PACid:27171245	11 kDa	0	0	0	2	2	0	0	0	0	0.227	0.227	0
GroES-like family protein	Phvul.010G041700.1|PACid:27141362	15 kDa	2	3	2	2	2	3	0.246	0.299	0.246	0.246	0.246	0.276
GroES-like zinc-binding dehydrogenase family protein	Phvul.001G167100.1|PACid:27164087 (+1)	41 kDa	2	0	0	0	0	0	0.126	0	0	0	0	0
GTP binding Elongation factor Tu family protein	Phvul.004G075100.1|PACid:27158020	49 kDa	3	2	2	2	2	2	0.0582	0.0626	0.0649	0.0425	0.0425	0.0626
GYF domain-containing protein	Phvul.001G015100.3|PACid:27162510	188 kDa	0	0	2	0	0	0	0	0	0.021	0	0	0
HAD superfamily, subfamily IIIB acid phosphatase	Phvul.004G174200.1|PACid:27156865	28 kDa	2	0	0	0	0	2	0.12	0	0	0	0	0.12
HAD superfamily, subfamily IIIB acid phosphatase	Phvul.010G144300.1|PACid:27140721	29 kDa	2	0	5	2	2	6	0.11	0	0.322	0.192	0.176	0.337
Haloacid dehalogenase-like hydrolase (HAD) superfamily protein	Phvul.002G257400.1|PACid:27170278	34 kDa	0	2	0	0	0	0	0	0.0962	0	0	0	0
Haloacid dehalogenase-like hydrolase (HAD) superfamily protein	Phvul.009G169900.1|PACid:27147379 (+2)	37 kDa	2	4	0	0	4	2	0.0557	0.123	0	0	0.106	0.0557
haloacid dehalogenase-like hydrolase family protein	Phvul.001G224700.1|PACid:27163351	116 kDa	0	0	0	2	0	0	0	0	0	0.0413	0	0
heat shock cognate protein 7Unknown-1	Phvul.008G013000.1|PACid:27155656	71 kDa	2	0	3	0	0	0	0.125	0	0.196	0	0	0
heat shock factor binding protein	Phvul.007G106500.1|PACid:27160354	10 kDa	0	0	2	3	2	2	0	0	0.455	0.58	0.455	0.455
heat shock protein 7Unknown	Phvul.011G065000.1|PACid:27152952	71 kDa	5	5	7	3	3	6	0.12	0.145	0.179	0.0616	0.0986	0.176
Heat shock protein 7Unknown (Hsp 7Unknown) family protein	Phvul.002G301400.1|PACid:27167727	73 kDa	18	4	18	0	3	18	0.308	0.101	0.326	0	0.0841	0.314
HEAT SHOCK PROTEIN 81.4	Phvul.008G281400.1|PACid:27156117	80 kDa	3	0	0	0	0	0	0.0587	0	0	0	0	0
Heavy metal transport/detoxification superfamily protein	Phvul.004G019800.1|PACid:27157513	19 kDa	4	4	6	6	6	4	0.277	0.277	0.277	0.277	0.277	0.277
high cyclic electron flow 1	Phvul.008G112000.1|PACid:27156195	44 kDa	4	7	7	7	6	4	0.164	0.296	0.257	0.271	0.237	0.132
high mobility group A	Phvul.008G236000.1|PACid:27155653	19 kDa	2	0	0	0	0	0	0.193	0	0	0	0	0
HIS triad family protein 3	Phvul.004G053100.1|PACid:27156937	17 kDa	0	0	2	0	0	0	0	0	0.148	0	0	0
HISTIDINE TRIAD NUCLEOTIDE-BINDING 2	Phvul.009G240300.1|PACid:27145569	19 kDa	0	2	3	2	2	3	0	0.112	0.185	0.112	0.112	0.185
histone H4	Phvul.001G169200.1|PACid:27164686 (+11)	11 kDa	0	0	3	0	0	0	0	0	0.291	0	0	0
Histone superfamily protein	Phvul.002G269200.1|PACid:27168833 (+6)	15 kDa	2	0	0	0	0	0	0.287	0	0	0	0	0
Histone superfamily protein	Phvul.011G066500.1|PACid:27150778	16 kDa	4	0	2	0	2	3	0.279	0	0.129	0	0.163	0.231
homolog of carrot EP3-3 chitinase	Phvul.011G051500.1|PACid:27150682	26 kDa	0	2	0	0	0	2	0	0.152	0	0	0	0.152
homolog of carrot EP3-3 chitinase	Phvul.005G155800.1|PACid:27149003	29 kDa	0	0	2	0	0	2	0	0	0.125	0	0	0.125
homolog of Synechocystis YCF37	Phvul.002G023600.1|PACid:27169948	17 kDa	0	2	0	0	2	3	0	0.156	0	0	0.2	0.206
HSP7Unknown-interacting protein 1	Phvul.003G214200.1|PACid:27143904	45 kDa	2	0	2	0	0	3	0.0576	0	0.0576	0	0	0.115
Hyaluronan / mRNA binding family	Phvul.007G003500.1|PACid:27160423	39 kDa	0	0	2	2	2	2	0	0	0.0503	0.0894	0.0894	0.0894
Hyaluronan / mRNA binding family	Phvul.008G047300.1|PACid:27154232	39 kDa	3	2	2	0	0	3	0.178	0.112	0.112	0	0	0.178
Hyaluronan / mRNA binding family	Phvul.010G049300.1|PACid:27140350	38 kDa	0	0	2	0	2	2	0	0	0.0641	0	0.0641	0.0975
hydroxymethylbilane synthase	Phvul.002G034500.1|PACid:27168859	42 kDa	5	4	6	3	4	5	0.127	0.109	0.174	0.109	0.109	0.127
hydroxyproline-rich glycoprotein family protein	Phvul.006G083300.1|PACid:27165339	47 kDa	0	0	2	0	2	0	0	0	0.0581	0	0.0581	0
Inositol monophosphatase family protein	Phvul.006G142400.1|PACid:27165516 (+1)	33 kDa	2	0	3	0	0	0	0.131	0	0.196	0	0	0
Isochorismatase family protein	Phvul.010G147700.1|PACid:27141488	30 kDa	0	0	2	0	0	0	0	0	0.133	0	0	0
isopentenyl pyrophosphate:dimethylallyl pyrophosphate isomerase 2	Phvul.L002800.1|PACid:27145205	34 kDa	0	0	4	0	0	3	0	0	0.156	0	0	0.12
isopropyl malate isomerase large subunit 1	Phvul.007G232000.1|PACid:27159414	55 kDa	2	0	2	0	0	0	0.0559	0	0.0559	0	0	0
isopropylmalate dehydrogenase 2	Phvul.005G181600.1|PACid:27148470	44 kDa	4	2	5	4	4	4	0.197	0.118	0.224	0.197	0.197	0.172
ketol-acid reductoisomerase	Phvul.011G134200.1|PACid:27152507	63 kDa	0	0	2	2	0	3	0	0	0.0624	0.0451	0	0.0624
ketol-acid reductoisomerase	Phvul.005G095900.1|PACid:27150237	63 kDa	0	0	2	2	0	2	0	0	0.0447	0.0447	0	0.0447
KH domain-containing protein	Phvul.009G076800.1|PACid:27145260	66 kDa	0	0	0	0	2	2	0	0	0	0	0.079	0.0537
KH domain-containing protein	Phvul.009G076600.1|PACid:27146084	66 kDa	4	2	5	4	2	2	0.0942	0.0549	0.0926	0.0942	0.0549	0.0691
Kunitz family trypsin and protease inhibitor protein	Phvul.011G169900.1|PACid:27152671	23 kDa	4	0	5	2	0	5	0.285	0	0.29	0.14	0	0.42
Kunitz family trypsin and protease inhibitor protein	Phvul.004G137600.1|PACid:27157016	23 kDa	0	0	2	0	0	3	0	0	0.17	0	0	0.236
kunitz trypsin inhibitor 1	Phvul.011G169800.1|PACid:27151630	23 kDa	0	0	2	0	0	0	0	0	0.167	0	0	0
lactate/malate dehydrogenase family protein	Phvul.007G140600.1|PACid:27158684	48 kDa	2	2	0	0	0	0	0.108	0.108	0	0	0	0
Lactate/malate dehydrogenase family protein	Phvul.007G273500.1|PACid:27159288	35 kDa	7	5	7	0	4	8	0.337	0.253	0.337	0	0.205	0.337
Lactate/malate dehydrogenase family protein	Phvul.011G159000.1|PACid:27151726	36 kDa	7	10	10	11	8	8	0.267	0.429	0.429	0.441	0.391	0.267
Lactoylglutathione lyase / glyoxalase I family protein	Phvul.003G134400.1|PACid:27142532	23 kDa	0	2	0	3	3	2	0	0.126	0	0.188	0.188	0.126
Lactoylglutathione lyase / glyoxalase I family protein	Phvul.008G136900.1|PACid:27153556	17 kDa	3	0	4	3	2	4	0.319	0	0.38	0.319	0.178	0.38
lactoylglutathione lyase family protein / glyoxalase I family protein	Phvul.011G084400.1|PACid:27151118	26 kDa	2	0	3	3	3	2	0.116	0	0.206	0.176	0.206	0.116
Late embryogenesis abundant protein, group 6	Phvul.003G237400.1|PACid:27142183	9 kDa	0	0	0	2	0	0	0	0	0	0.488	0	0
Leucine-rich repeat (LRR) family protein	Phvul.005G149200.1|PACid:27149882	38 kDa	3	2	5	3	4	4	0.125	0.0767	0.188	0.125	0.148	0.165
Leucine-rich repeat (LRR) family protein	Phvul.002G092200.1|PACid:27169164	50 kDa	6	4	4	4	0	10	0.183	0.0891	0.098	0.098	0	0.272
light harvesting complex of photosystem II 5	Phvul.004G128200.1|PACid:27158466	31 kDa	3	5	5	4	5	2	0.153	0.188	0.188	0.153	0.271	0.0486
light harvesting complex photosystem II	Phvul.010G002100.1|PACid:27140216	31 kDa	2	2	0	0	0	0	0.0865	0.0865	0	0	0	0
light harvesting complex photosystem II subunit 6	Phvul.006G207300.1|PACid:27166485	27 kDa	2	2	2	0	0	0	0.116	0.116	0.116	0	0	0
light harvesting complex photosystem II subunit 6	Phvul.002G207500.1|PACid:27170403	28 kDa	3	2	2	0	0	0	0.298	0.167	0.167	0	0	0
light-harvesting chlorophyll B-binding protein 3	Phvul.005G085800.1|PACid:27148435	29 kDa	3	3	4	0	0	0	0.186	0.186	0.204	0	0	0
lipid transfer protein 1	Phvul.010G066400.1|PACid:27140848	12 kDa	5	5	4	5	4	4	0.458	0.568	0.458	0.458	0.458	0.458
lipid transfer protein 3	Phvul.010G069100.1|PACid:27141617	12 kDa	0	3	0	0	0	0	0	0.441	0	0	0	0
lipid transfer protein 4	Phvul.008G087000.1|PACid:27153492	12 kDa	2	2	3	4	3	3	0.362	0.362	0.362	0.405	0.362	0.362
lipid transfer protein 6	Phvul.010G069500.1|PACid:27140960	13 kDa	0	0	2	2	0	0	0	0	0.184	0.256	0	0
lipoamide dehydrogenase 1	Phvul.009G254900.1|PACid:27146148	59 kDa	2	2	7	4	3	3	0.0498	0.0498	0.174	0.114	0.0819	0.0819
lipoxygenase 2	Phvul.011G056500.1|PACid:27151588	103 kDa	3	0	4	0	2	5	0.0588	0	0.0588	0	0.0299	0.101
Li-tolerant lipase 1	Phvul.006G107100.1|PACid:27166559	41 kDa	0	0	0	0	3	2	0	0	0	0	0.144	0.0949
lumazine-binding family protein	Phvul.011G114100.1|PACid:27151172	30 kDa	2	0	0	0	0	0	0.062	0	0	0	0	0
LYR family of Fe/S cluster biogenesis protein	Phvul.009G002900.1|PACid:27146537	13 kDa	0	0	2	0	0	2	0	0	0.27	0	0	0.252
lysm domain GPI-anchored protein 2 precursor	Phvul.002G188800.1|PACid:27170091	39 kDa	0	0	2	0	0	3	0	0	0.0296	0	0	0.0593
malate dehydrogenase	Phvul.003G189700.1|PACid:27144002	43 kDa	0	3	0	0	0	2	0	0.157	0	0	0	0.0751
manganese superoxide dismutase 1	Phvul.009G141600.1|PACid:27146654	27 kDa	3	3	0	0	2	2	0.155	0.126	0	0	0.0921	0.109
Matrixin family protein	Phvul.004G021000.1|PACid:27156589	32 kDa	7	0	9	0	0	9	0.286	0	0.403	0	0	0.379
MD-2-related lipid recognition domain-containing protein	Phvul.011G100100.1|PACid:27151261	17 kDa	0	0	0	3	2	0	0	0	0	0.363	0.312	0
membrane steroid binding protein 1	Phvul.007G068900.1|PACid:27158860	23 kDa	2	2	3	3	2	3	0.142	0.142	0.19	0.19	0.142	0.19
metacaspase 5	Phvul.011G180300.1|PACid:27150868	45 kDa	2	4	4	4	2	4	0.0506	0.154	0.171	0.149	0.0892	0.149
Metallo-hydrolase/oxidoreductase superfamily protein	Phvul.008G187100.1|PACid:27155701	29 kDa	0	0	2	3	0	0	0	0	0.0891	0.128	0	0
methionine sulfoxide reductase B 2	Phvul.006G198700.1|PACid:27166655	21 kDa	0	0	2	2	0	2	0	0	0.228	0.228	0	0.228
methyl-CPG-binding domain 1Unknown	Phvul.010G155700.1|PACid:27140389	32 kDa	2	4	4	4	3	3	0.115	0.274	0.184	0.184	0.184	0.156
MIF4G domain-containing protein / MA3 domain-containing protein	Phvul.003G154900.1|PACid:27143615	87 kDa	0	0	2	0	0	0	0	0	0.0443	0	0	0
mitochondrial acyl carrier protein 2	Phvul.008G052400.1|PACid:27154153	14 kDa	0	0	2	0	0	0	0	0	0.195	0	0	0
Mitochondrial glycoprotein family protein	Phvul.008G115200.1|PACid:27155468	28 kDa	2	0	0	0	0	0	0.181	0	0	0	0	0
mitochondrial HSO7Unknown 2	Phvul.002G215800.1|PACid:27170609	73 kDa	0	0	2	0	0	2	0	0	0.0414	0	0	0.0414
mitochondrial lipoamide dehydrogenase 1	Phvul.003G118800.1|PACid:27145068	53 kDa	7	8	5	6	4	3	0.2	0.222	0.166	0.172	0.106	0.084
MLP-like protein 423	Phvul.003G109100.1|PACid:27142580	17 kDa	10	3	16	0	0	10	0.622	0.282	0.962	0	0	0.532
MLP-like protein 423	Phvul.009G253000.1|PACid:27146855	17 kDa	2	0	2	0	0	2	0.161	0	0.135	0	0	0.181
MLP-like protein 423	Phvul.002G209400.1|PACid:27170360 (+1)	16 kDa	0	0	3	0	0	0	0	0	0.477	0	0	0
MLP-like protein 423	Phvul.003G109200.1|PACid:27143989 (+5)	16 kDa	0	0	4	0	0	0	0	0	0.458	0	0	0
MLP-like protein 423	Phvul.009G252400.1|PACid:27146141	21 kDa	4	2	4	3	2	3	0.314	0.199	0.314	0.257	0.199	0.257
Mog1/PsbP/DUF1795-like photosystem II reaction center PsbP family protein	Phvul.005G020200.1|PACid:27149895	26 kDa	0	0	0	2	0	0	0	0	0	0.0833	0	0
Mog1/PsbP/DUF1795-like photosystem II reaction center PsbP family protein	Phvul.009G134500.1|PACid:27147631	29 kDa	2	5	3	2	2	3	0.112	0.269	0.194	0.108	0.108	0.157
Mog1/PsbP/DUF1795-like photosystem II reaction center PsbP family protein	Phvul.001G119100.1|PACid:27164285	29 kDa	0	3	0	0	2	0	0	0.169	0	0	0.131	0
monodehydroascorbate reductase 1	Phvul.007G230300.1|PACid:27160270	47 kDa	7	5	4	3	4	6	0.289	0.201	0.201	0.159	0.162	0.229
NAD(P)-binding Rossmann-fold superfamily protein	Phvul.010G011300.1|PACid:27140467	28 kDa	2	3	2	3	3	3	0.125	0.216	0.125	0.188	0.188	0.188
NAD(P)-binding Rossmann-fold superfamily protein	Phvul.008G119600.1|PACid:27156284	36 kDa	5	9	8	4	5	6	0.228	0.438	0.453	0.219	0.228	0.289
NAD(P)-binding Rossmann-fold superfamily protein	Phvul.002G241100.1|PACid:27169058	66 kDa	0	3	0	0	0	0	0	0.133	0	0	0	0
NAD(P)-linked oxidoreductase superfamily protein	Phvul.006G028400.1|PACid:27166311	41 kDa	0	0	0	2	2	0	0	0	0	0.073	0.073	0
NAD(P)-linked oxidoreductase superfamily protein	Phvul.002G216600.1|PACid:27169853	34 kDa	2	0	0	0	0	0	0.0665	0	0	0	0	0
NAD(P)-linked oxidoreductase superfamily protein	Phvul.010G017100.1|PACid:27141117	35 kDa	0	0	2	0	0	2	0	0	0.0735	0	0	0.0735
NADH-ubiquinone oxidoreductase B18 subunit, putative	Phvul.007G019800.1|PACid:27158880	12 kDa	0	0	2	2	0	0	0	0	0.286	0.286	0	0
NADP-malic enzyme 3	Phvul.002G309600.1|PACid:27169865	72 kDa	0	0	0	2	0	2	0	0	0	0.0585	0	0.0769
NADP-malic enzyme 4	Phvul.004G170800.1|PACid:27157719	65 kDa	2	0	4	0	0	2	0.0423	0	0.0829	0	0	0.0355
Nascent polypeptide-associated complex (NAC), alpha subunit family protein	Phvul.001G117000.1|PACid:27163457	22 kDa	2	0	2	0	2	4	0.154	0	0.154	0	0.154	0.308
nascent polypeptide-associated complex subunit alpha-like protein 2	Phvul.009G038400.1|PACid:27146681	24 kDa	3	0	3	0	3	4	0.14	0	0.14	0	0.14	0.207
NDH-dependent cyclic electron flow 1	Phvul.005G170200.1|PACid:27148383	23 kDa	0	0	0	3	0	0	0	0	0	0.223	0	0
neurofilament protein-related	Phvul.007G206100.1|PACid:27160092 (+1)	105 kDa	2	7	4	5	2	3	0.026	0.126	0.0592	0.0935	0.0312	0.0447
NmrA-like negative transcriptional regulator family protein	Phvul.009G059000.1|PACid:27147962	34 kDa	6	4	4	0	0	5	0.258	0.158	0.203	0	0	0.226
nodulin-related protein 1	Phvul.002G168000.1|PACid:27169194	12 kDa	8	10	11	9	10	10	0.828	0.853	0.853	0.853	0.853	0.853
non-photochemical quenching 1	Phvul.006G108200.1|PACid:27165356 (+1)	54 kDa	0	2	0	0	2	0	0	0.0854	0	0	0.0854	0
N-terminal nucleophile aminohydrolases (Ntn hydrolases) superfamily protein	Phvul.009G103400.1|PACid:27146052	25 kDa	2	2	2	0	2	2	0.116	0.112	0.112	0	0.112	0.112
nuclear encoded CLP protease 5	Phvul.007G213700.1|PACid:27160580	33 kDa	2	3	0	2	2	0	0.0858	0.142	0	0.102	0.102	0
Nucleic acid-binding, OB-fold-like protein	Phvul.001G199400.1|PACid:27163065 (+1)	8 kDa	0	0	0	0	2	3	0	0	0	0	0.292	0.292
Nucleic acid-binding, OB-fold-like protein	Phvul.002G287600.1|PACid:27168248	82 kDa	0	0	0	2	0	0	0	0	0	0.041	0	0
nucleoside diphosphate kinase 2	Phvul.003G208500.1|PACid:27143746	25 kDa	3	5	3	5	4	3	0.176	0.216	0.176	0.264	0.216	0.185
Nucleoside diphosphate kinase family protein	Phvul.010G045400.1|PACid:27141223	17 kDa	8	6	9	6	8	9	0.349	0.322	0.483	0.322	0.477	0.503
Nucleoside diphosphate kinase family protein	Phvul.002G297900.1|PACid:27170671	26 kDa	0	3	0	0	2	0	0	0.122	0	0	0.0504	0
nucleosome assembly protein 1;2	Phvul.003G135500.1|PACid:27145128	42 kDa	0	0	2	0	2	2	0	0	0.0815	0	0.0707	0.0815
Nucleotide-diphospho-sugar transferases superfamily protein	Phvul.003G090900.1|PACid:27143119	34 kDa	2	0	0	0	0	2	0.085	0	0	0	0	0.0915
O-acetylserine (thiol) lyase (OAS-TL) isoform A1	Phvul.002G045200.1|PACid:27170844	34 kDa	0	2	0	0	0	0	0	0.157	0	0	0	0
O-acetylserine (thiol) lyase (OAS-TL) isoform A1	Phvul.006G099100.1|PACid:27165095	34 kDa	3	4	4	3	3	5	0.135	0.218	0.218	0.218	0.203	0.258
O-acetylserine (thiol) lyase isoform C	Phvul.003G060200.1|PACid:27141782	35 kDa	4	6	5	5	5	4	0.239	0.34	0.202	0.273	0.239	0.239
ornithine carbamoyltransferase	Phvul.009G059600.1|PACid:27147348	40 kDa	0	2	2	0	0	0	0	0.106	0.106	0	0	0
ortholog of human splicing factor SC35	Phvul.002G208600.1|PACid:27169938 (+2)	31 kDa	2	0	0	0	0	0	0.0933	0	0	0	0	0
osmotin 34	Phvul.002G155500.1|PACid:27169514	26 kDa	6	4	6	0	0	5	0.306	0.306	0.413	0	0	0.347
osmotin 34	Phvul.002G286600.1|PACid:27170781	24 kDa	0	0	2	0	0	0	0	0	0.52	0	0	0
osmotin 34	Phvul.002G286500.1|PACid:27168463	24 kDa	7	2	12	4	0	8	0.5	0.158	0.545	0.392	0	0.473
Oxidoreductase, zinc-binding dehydrogenase family protein	Phvul.003G060300.1|PACid:27143379	41 kDa	9	10	10	9	10	9	0.379	0.402	0.399	0.371	0.371	0.402
Oxidoreductase, zinc-binding dehydrogenase family protein	Phvul.008G151800.1|PACid:27154209	34 kDa	6	8	7	6	5	7	0.301	0.329	0.329	0.326	0.298	0.379
Papain family cysteine protease	Phvul.001G009900.1|PACid:27164490	40 kDa	0	3	2	3	2	3	0	0.0932	0.0685	0.0932	0.0685	0.0932
pathogenesis-related 4	Phvul.006G102300.1|PACid:27166843	16 kDa	5	2	4	0	0	4	0.605	0.143	0.442	0	0	0.442
pathogenesis-related 4	Phvul.006G102200.1|PACid:27165793	21 kDa	5	3	5	2	0	6	0.381	0.234	0.381	0.234	0	0.381
PDI-like 1-2	Phvul.009G126800.1|PACid:27147260	58 kDa	12	4	9	2	3	9	0.33	0.119	0.277	0.0723	0.105	0.229
PDI-like 1-4	Phvul.005G135600.1|PACid:27149283	63 kDa	2	0	0	0	0	0	0.0551	0	0	0	0	0
Pentapeptide repeat-containing protein	Phvul.002G061100.1|PACid:27170040	30 kDa	3	5	3	4	4	3	0.204	0.307	0.204	0.254	0.254	0.204
Peptidase M2Unknown/M25/M4Unknown family protein	Phvul.003G001200.1|PACid:27142394	51 kDa	0	0	2	0	0	0	0	0	0.0553	0	0	0
peptide met sulfoxide reductase 4	Phvul.008G267100.1|PACid:27155730	29 kDa	0	2	0	3	0	0	0	0.155	0	0.14	0	0
peptidylprolyl cis/trans isomerase, NIMA-interacting 1	Phvul.003G260800.1|PACid:27141914	13 kDa	0	2	0	0	0	0	0	0.156	0	0	0	0
peroxidase 2	Phvul.006G129600.1|PACid:27165136	38 kDa	0	0	0	0	0	2	0	0	0	0	0	0.122
Peroxidase superfamily protein	Phvul.007G082600.1|PACid:27161387	38 kDa	0	0	0	3	2	3	0	0	0	0.111	0.111	0.169
Peroxidase superfamily protein	Phvul.007G082700.1|PACid:27161670	39 kDa	0	2	0	0	0	2	0	0.116	0	0	0	0.0763
Peroxidase superfamily protein	Phvul.006G129700.1|PACid:27165752	39 kDa	0	2	0	0	0	2	0	0.0935	0	0	0	0.13
peroxin 14	Phvul.003G200200.1|PACid:27142144 (+2)	57 kDa	0	0	0	2	0	0	0	0	0	0.0749	0	0
peroxiredoxin IIF	Phvul.006G151800.1|PACid:27166483	21 kDa	2	3	3	3	3	3	0.117	0.117	0.117	0.162	0.162	0.117
peroxisomal NAD-malate dehydrogenase 2	Phvul.002G216800.1|PACid:27167607 (+1)	37 kDa	2	8	2	5	6	4	0.059	0.388	0.073	0.216	0.239	0.169
pfkB-like carbohydrate kinase family protein	Phvul.005G153300.1|PACid:27150378	35 kDa	3	2	3	0	0	2	0.1	0.0848	0.112	0	0	0.0788
phosphatase-related	Phvul.004G104600.1|PACid:27156862 (+1)	41 kDa	3	0	2	0	0	0	0.106	0	0.078	0	0	0
phosphoglucomutase	Phvul.007G064900.1|PACid:27160641	68 kDa	2	0	2	0	0	0	0.0621	0	0.0653	0	0	0
phosphoglycerate kinase	Phvul.005G050800.1|PACid:27148357 (+1)	42 kDa	10	2	5	3	3	7	0.436	0.172	0.262	0.192	0.192	0.294
Phosphoglycerate kinase family protein	Phvul.005G050700.1|PACid:27148804	50 kDa	23	25	23	23	26	22	0.537	0.656	0.553	0.509	0.61	0.505
Phosphoglycerate mutase, 2,3-bisphosphoglycerate-independent	Phvul.008G077900.1|PACid:27155277	61 kDa	2	0	3	2	0	0	0.0789	0	0.138	0.0842	0	0
phospholipase A 2A	Phvul.001G020100.1|PACid:27163730	45 kDa	0	0	2	0	0	0	0	0	0.086	0	0	0
phosphomannomutase	Phvul.008G068100.1|PACid:27155643	28 kDa	0	0	0	0	0	2	0	0	0	0	0	0.085
phosphoribulokinase	Phvul.002G133100.1|PACid:27167548	45 kDa	12	14	10	6	11	10	0.301	0.499	0.296	0.215	0.35	0.267
photosynthetic electron transfer A	Phvul.001G117600.1|PACid:27164709	11 kDa	0	0	0	3	0	0	0	0	0	0.367	0	0
photosynthetic electron transfer C	Phvul.005G109400.1|PACid:27148765	24 kDa	5	9	7	9	7	7	0.317	0.458	0.427	0.458	0.427	0.348
photosystem I light harvesting complex gene 1	Phvul.004G071500.1|PACid:27156956	26 kDa	2	2	2	0	2	0	0.131	0.131	0.131	0	0.131	0
photosystem I light harvesting complex gene 3	Phvul.008G289700.1|PACid:27154013	30 kDa	4	4	4	2	3	4	0.275	0.275	0.275	0.163	0.214	0.275
photosystem I P subunit	Phvul.009G258500.1|PACid:27146197	19 kDa	2	2	0	2	3	2	0.196	0.19	0	0.19	0.263	0.19
photosystem I P subunit	Phvul.010G120100.1|PACid:27140391	18 kDa	0	0	2	0	0	0	0	0	0.107	0	0	0
photosystem I reaction center subunit PSI-N, chloroplast, putative / PSI-N, putative (PSAN)	Phvul.002G269400.1|PACid:27171035	18 kDa	7	7	7	8	7	7	0.288	0.288	0.288	0.347	0.288	0.288
photosystem I subunit D-2	Phvul.007G055900.1|PACid:27159988	23 kDa	14	14	11	14	13	13	0.604	0.643	0.556	0.594	0.594	0.585
photosystem I subunit E-2	Phvul.008G133700.1|PACid:27154680	14 kDa	3	5	2	0	5	3	0.485	0.338	0.254	0	0.523	0.315
photosystem I subunit E-2	Phvul.007G155500.1|PACid:27161570	14 kDa	5	5	4	5	5	5	0.561	0.561	0.538	0.561	0.561	0.561
photosystem I subunit F	Phvul.003G186300.1|PACid:27143658	24 kDa	0	5	2	0	2	0	0	0.189	0.113	0	0.0541	0
photosystem I subunit G	Phvul.005G004000.1|PACid:27149968	17 kDa	3	2	0	0	0	2	0.211	0.106	0	0	0	0.106
photosystem I subunit H2	Phvul.010G148800.1|PACid:27139821	15 kDa	5	6	5	6	5	5	0.396	0.569	0.396	0.569	0.396	0.396
photosystem I subunit K	Phvul.009G216400.1|PACid:27147271	13 kDa	2	2	0	0	0	0	0.357	0.357	0	0	0	0
Photosystem II 5 kD protein	Phvul.011G009700.1|PACid:27152166	11 kDa	0	2	2	0	0	0	0	0.132	0.132	0	0	0
photosystem II family protein	Phvul.005G105900.1|PACid:27148554	18 kDa	5	5	5	5	4	5	0.241	0.241	0.188	0.188	0.188	0.188
photosystem II light harvesting complex gene 2.1	Phvul.008G285100.1|PACid:27154358	29 kDa	2	0	2	0	0	0	0.328	0	0.253	0	0	0
photosystem II reaction center PSB28 protein	Phvul.007G153500.1|PACid:27160448	20 kDa	2	2	2	2	2	2	0.156	0.156	0.156	0.156	0.156	0.156
Photosystem II reaction center PsbP family protein	Phvul.001G224100.1|PACid:27163853	29 kDa	0	0	2	0	0	0	0	0	0.202	0	0	0
photosystem II stability/assembly factor, chloroplast (HCF136)	Phvul.011G029800.1|PACid:27152681 (+1)	43 kDa	4	4	2	0	3	4	0.139	0.139	0.0734	0	0.114	0.139
photosystem II subunit O-2	Phvul.002G024000.1|PACid:27170025	35 kDa	21	21	19	22	20	20	0.59	0.59	0.565	0.653	0.578	0.584
photosystem II subunit O-2	Phvul.003G249800.1|PACid:27144070	35 kDa	3	4	4	4	2	2	0.588	0.588	0.564	0.588	0.564	0.518
photosystem II subunit P-1	Phvul.003G247600.1|PACid:27144472	28 kDa	11	17	13	12	13	13	0.479	0.582	0.559	0.502	0.582	0.502
photosystem II subunit P-1	Phvul.008G196500.1|PACid:27155546	28 kDa	9	9	9	7	9	7	0.398	0.379	0.548	0.487	0.544	0.36
photosystem II subunit Q-2	Phvul.010G052300.1|PACid:27141041	24 kDa	13	16	13	17	14	13	0.507	0.529	0.507	0.587	0.538	0.507
photosystem II subunit R	Phvul.005G055200.1|PACid:27148459	14 kDa	4	6	5	6	7	5	0.281	0.338	0.281	0.338	0.353	0.281
Phvul.UnknownUnknown3G1667UnknownUnknown.1	Phvul.003G166700.1|PACid:27142355	35 kDa	0	0	2	0	0	0	0	0	0.0785	0	0	0
Phvul.UnknownUnknown6GUnknown729UnknownUnknown.1	Phvul.006G072900.1|PACid:27165540	51 kDa	0	0	0	2	0	0	0	0	0	0.087	0	0
Plant basic secretory protein (BSP) family protein	Phvul.007G040900.1|PACid:27160861	25 kDa	3	0	3	0	0	4	0.154	0	0.158	0	0	0.204
Plant basic secretory protein (BSP) family protein	Phvul.007G041000.1|PACid:27158828	26 kDa	6	0	4	0	0	4	0.23	0	0.243	0	0	0.191
plasma-membrane associated cation-binding protein 1	Phvul.009G245700.1|PACid:27147901	23 kDa	0	2	0	0	0	0	0	0.13	0	0	0	0
plasmodesmata callose-binding protein 3	Phvul.009G192000.1|PACid:27147835	25 kDa	0	0	0	0	0	2	0	0	0	0	0	0.172
plastid ribosomal protein l11	Phvul.004G090600.1|PACid:27158071	23 kDa	2	2	0	5	4	5	0.185	0.185	0	0.311	0.279	0.347
plastid transcriptionally active 16	Phvul.011G061600.1|PACid:27152979	55 kDa	6	10	5	0	3	0	0.189	0.265	0.179	0	0.123	0
plastid transcriptionally active 4	Phvul.008G099200.1|PACid:27154097 (+1)	36 kDa	2	2	3	2	0	2	0.127	0.102	0.157	0.127	0	0.127
Plastid-lipid associated protein PAP / fibrillin family protein	Phvul.002G137800.1|PACid:27168752	39 kDa	0	0	2	0	0	0	0	0	0.0874	0	0	0
Plastid-lipid associated protein PAP / fibrillin family protein	Phvul.007G124100.1|PACid:27160607	29 kDa	0	2	0	0	0	0	0	0.135	0	0	0	0
Plastid-lipid associated protein PAP / fibrillin family protein	Phvul.006G214200.1|PACid:27167014	26 kDa	0	3	3	4	0	4	0	0.186	0.254	0.314	0	0.314
plastocyanin 1	Phvul.009G020300.1|PACid:27145939	17 kDa	5	5	4	5	4	4	0.437	0.437	0.413	0.437	0.413	0.413
P-loop containing nucleoside triphosphate hydrolases superfamily protein	Phvul.006G178400.1|PACid:27167211	46 kDa	4	3	5	0	5	5	0.137	0.103	0.161	0	0.163	0.216
P-loop containing nucleoside triphosphate hydrolases superfamily protein	Phvul.010G040800.1|PACid:27141206	23 kDa	0	0	2	0	0	2	0	0	0.155	0	0	0.121
poly(A) binding protein 2	Phvul.003G047500.1|PACid:27144812	70 kDa	4	4	5	8	6	8	0.108	0.114	0.148	0.261	0.159	0.232
poly(A) binding protein 2	Phvul.001G023500.1|PACid:27162666	72 kDa	0	0	0	2	0	0	0	0	0	0.0922	0	0
polygalacturonase inhibiting protein 1	Phvul.009G180400.1|PACid:27146878	23 kDa	0	0	3	0	3	4	0	0	0.208	0	0.212	0.25
polygalacturonase inhibiting protein 1	Phvul.002G201800.1|PACid:27170678	36 kDa	0	0	3	0	0	2	0	0	0.117	0	0	0.0721
post-illumination chlorophyll fluorescence increase	Phvul.010G156300.1|PACid:27141410	30 kDa	0	4	0	3	3	0	0	0.151	0	0.119	0.119	0
profilin 2	Phvul.002G307600.1|PACid:27169401	14 kDa	2	2	2	2	2	2	0.176	0.374	0.374	0.374	0.374	0.374
proline-rich family protein	Phvul.005G018300.1|PACid:27149753	24 kDa	0	0	2	2	0	0	0	0	0.143	0.143	0	0
proteasome subunit PAB1	Phvul.005G059300.1|PACid:27149616	26 kDa	5	5	5	0	4	5	0.23	0.23	0.23	0	0.183	0.23
protein containing PDZ domain, a K-box domain, and a TPR region	Phvul.002G247200.1|PACid:27167565	37 kDa	5	6	5	7	5	5	0.182	0.182	0.31	0.342	0.283	0.205
Protein of unknown function, DUF538	Phvul.001G224400.1|PACid:27164202	18 kDa	0	0	0	0	0	2	0	0	0	0	0	0.211
Protein of unknown function, DUF642	Phvul.001G053100.1|PACid:27162892	40 kDa	5	4	5	2	3	5	0.186	0.161	0.183	0.0792	0.117	0.186
Protein of unknown function, DUF642	Phvul.005G024100.1|PACid:27149942	40 kDa	0	0	2	0	0	2	0	0	0.0736	0	0	0.0736
Protein prenylyltransferase superfamily protein	Phvul.002G187000.1|PACid:27170414	32 kDa	2	0	2	0	0	0	0.139	0	0.139	0	0	0
protein tyrosine phosphatases;protein tyrosine phosphatases	Phvul.011G091000.1|PACid:27152953	30 kDa	0	0	0	0	2	2	0	0	0	0	0.164	0.164
Proteinase inhibitor, propeptide	Phvul.007G245700.1|PACid:27161164	14 kDa	0	0	0	3	0	0	0	0	0	0.336	0	0
protochlorophyllide oxidoreductase A	Phvul.005G083700.1|PACid:27149633 (+1)	43 kDa	3	3	3	2	2	2	0.103	0.103	0.103	0.0752	0.0752	0.0752
PsbP-like protein 1	Phvul.008G015100.1|PACid:27153440	27 kDa	0	0	2	0	0	0	0	0	0.177	0	0	0
PTEN 2	Phvul.007G038300.1|PACid:27159803	68 kDa	0	0	2	0	0	0	0	0	0.0483	0	0	0
purple acid phosphatase 26	Phvul.003G170500.2|PACid:27143543	53 kDa	2	2	4	2	0	3	0.07	0.07	0.164	0.07	0	0.109
purple acid phosphatase 26	Phvul.003G170600.1|PACid:27145129	50 kDa	0	0	3	0	0	2	0	0	0.193	0	0	0.168
purple acid phosphatase 29	Phvul.010G121500.1|PACid:27140024	44 kDa	4	0	7	0	0	7	0.172	0	0.343	0	0	0.351
Pyridoxal phosphate (PLP)-dependent transferases superfamily protein	Phvul.002G217100.1|PACid:27171146	50 kDa	2	0	0	0	0	0	0.103	0	0	0	0	0
Pyridoxal-dependent decarboxylase family protein	Phvul.001G177300.1|PACid:27164551	54 kDa	2	0	0	0	0	0	0.0637	0	0	0	0	0
pyrimidine 1	Phvul.004G148000.1|PACid:27156570	46 kDa	0	0	0	2	0	0	0	0	0	0.0588	0	0
pyrophosphorylase 6	Phvul.006G198500.1|PACid:27167321	32 kDa	4	5	11	8	7	8	0.181	0.264	0.375	0.26	0.302	0.26
pyruvate dehydrogenase complex E1 alpha subunit	Phvul.002G077600.1|PACid:27171151	43 kDa	0	2	0	0	0	0	0	0.0486	0	0	0	0
Quinone reductase family protein	Phvul.002G219700.1|PACid:27170433	22 kDa	0	2	3	3	2	3	0	0.205	0.278	0.278	0.205	0.278
RAB GTPase 11C	Phvul.006G220200.1|PACid:27166794	24 kDa	0	0	4	2	0	3	0	0	0.207	0.0968	0	0.147
RAB GTPase homolog A2B	Phvul.011G061100.1|PACid:27151920	24 kDa	0	0	2	0	0	0	0	0	0.208	0	0	0
RAB GTPase homolog E1B	Phvul.003G205600.1|PACid:27144536	52 kDa	6	4	3	0	6	5	0.219	0.123	0.0919	0	0.228	0.157
RAB GTPase homolog G3A	Phvul.007G085200.1|PACid:27160795	23 kDa	0	0	0	2	0	0	0	0	0	0.223	0	0
RAB GTPase homolog G3F	Phvul.011G046100.1|PACid:27150539	23 kDa	0	0	4	2	0	3	0	0	0.364	0.155	0	0.209
Rad23 UV excision repair protein family	Phvul.007G026400.1|PACid:27161353	42 kDa	3	2	5	2	3	3	0.129	0.0721	0.226	0.0498	0.129	0.0995
RAN GTPase 3	Phvul.009G095400.1|PACid:27146252 (+2)	25 kDa	2	0	5	7	2	2	0.145	0	0.303	0.38	0.145	0.145
Ras-related small GTP-binding family protein	Phvul.011G066700.1|PACid:27151583	24 kDa	3	0	3	0	0	0	0.159	0	0.159	0	0	0
regulatory particle triple-A ATPase 5A	Phvul.007G197100.1|PACid:27160080	47 kDa	0	0	0	0	0	2	0	0	0	0	0	0.0426
related to ubiquitin 1	Phvul.005G060100.1|PACid:27150216	17 kDa	5	4	6	7	6	5	0.305	0.305	0.429	0.468	0.468	0.429
Remorin family protein	Phvul.004G116700.1|PACid:27157927	22 kDa	3	8	3	6	5	5	0.293	0.512	0.341	0.478	0.293	0.4
reversibly glycosylated polypeptide 3	Phvul.003G040000.1|PACid:27142537	50 kDa	3	0	2	0	0	0	0.0989	0	0.069	0	0	0
Rho termination factor	Phvul.007G192400.1|PACid:27159645	41 kDa	0	0	4	0	2	2	0	0	0.147	0	0.0804	0.0804
Ribonuclease E inhibitor RraA/Dimethylmenaquinone methyltransferase	Phvul.006G196200.1|PACid:27167308	30 kDa	4	5	6	5	4	6	0.172	0.22	0.246	0.22	0.179	0.265
Ribose 5-phosphate isomerase, type A protein	Phvul.006G100600.1|PACid:27165968	30 kDa	6	7	6	7	6	8	0.289	0.318	0.289	0.289	0.289	0.318
Ribosomal L5P family protein	Phvul.008G059200.1|PACid:27153603	29 kDa	4	3	3	6	6	6	0.213	0.116	0.127	0.317	0.284	0.295
Ribosomal L5P family protein	Phvul.005G011400.1|PACid:27149890 (+1)	21 kDa	2	0	0	0	0	0	0.166	0	0	0	0	0
ribosomal protein 1	Phvul.007G081800.1|PACid:27159239	45 kDa	2	0	0	0	0	0	0.0437	0	0	0	0	0
ribosomal protein 5B	Phvul.005G107000.1|PACid:27150398	23 kDa	3	0	2	0	0	2	0.188	0	0.126	0	0	0.126
Ribosomal protein L11 family protein	Phvul.011G079400.1|PACid:27152477	18 kDa	3	2	2	2	2	3	0.259	0.181	0.181	0.181	0.181	0.259
ribosomal protein L12-C	Phvul.011G027700.1|PACid:27151838 (+1)	25 kDa	6	6	8	7	8	6	0.212	0.212	0.342	0.229	0.355	0.212
Ribosomal protein L14p/L23e family protein	Phvul.001G164200.1|PACid:27162831 (+1)	15 kDa	0	0	0	2	0	0	0	0	0	0.186	0	0
Ribosomal protein L18ae/LX family protein	Phvul.006G163400.1|PACid:27167130	21 kDa	3	0	0	0	0	0	0.163	0	0	0	0	0
Ribosomal protein L18e/L15 superfamily protein	Phvul.003G204100.1|PACid:27144122	16 kDa	3	0	0	0	0	0	0.288	0	0	0	0	0
Ribosomal protein L19e family protein	Phvul.001G210100.1|PACid:27164432	25 kDa	2	0	0	0	0	0	0.137	0	0	0	0	0
Ribosomal protein L1p/L1Unknowne family	Phvul.011G011500.1|PACid:27152548	38 kDa	4	4	2	0	3	4	0.155	0.155	0.0946	0	0.135	0.155
Ribosomal protein L1Unknown family protein	Phvul.002G074600.1|PACid:27169727 (+1)	34 kDa	3	0	0	0	3	3	0.0872	0	0	0	0.0872	0.0872
ribosomal protein L2	Phvul.001G180400.1|PACid:27164062	15 kDa	2	0	0	0	0	0	0.188	0	0	0	0	0
Ribosomal protein L2 family	Phvul.003G261000.1|PACid:27143511 (+1)	28 kDa	0	0	2	0	0	0	0	0	0.1	0	0	0
Ribosomal protein L21	Phvul.007G089400.1|PACid:27159913	24 kDa	2	0	0	0	2	2	0.113	0	0	0	0.113	0.113
ribosomal protein L23AB	Phvul.011G067600.1|PACid:27152268	17 kDa	4	0	2	0	0	2	0.288	0	0.111	0	0	0.111
Ribosomal protein L3 family protein	Phvul.009G117700.1|PACid:27146237	29 kDa	3	0	2	0	2	0	0.161	0	0.127	0	0.116	0
Ribosomal protein L3Unknown/L7 family protein	Phvul.008G255000.1|PACid:27153562	28 kDa	3	0	2	3	0	3	0.189	0	0.103	0.189	0	0.148
ribosomal protein L4	Phvul.010G048100.1|PACid:27140429	34 kDa	0	0	2	0	0	0	0	0	0.114	0	0	0
Ribosomal protein L4/L1 family	Phvul.007G162900.1|PACid:27159061	45 kDa	3	0	0	0	0	0	0.111	0	0	0	0	0
ribosomal protein L5 B	Phvul.010G117700.1|PACid:27141214	34 kDa	4	0	3	0	0	0	0.227	0	0.144	0	0	0
Ribosomal protein L6 family	Phvul.004G116200.1|PACid:27156820	25 kDa	0	0	2	0	0	0	0	0	0.0973	0	0	0
Ribosomal protein L6 family	Phvul.009G039400.1|PACid:27147144	22 kDa	3	0	0	0	0	0	0.207	0	0	0	0	0
Ribosomal protein L6 family protein	Phvul.003G025200.1|PACid:27143706	26 kDa	2	0	0	0	0	0	0.103	0	0	0	0	0
Ribosomal protein L7Ae/L3Unknowne/S12e/Gadd45 family protein	Phvul.010G160500.1|PACid:27140145	15 kDa	2	0	2	0	0	0	0.207	0	0.207	0	0	0
Ribosomal protein L7Ae/L3Unknowne/S12e/Gadd45 family protein	Phvul.008G269000.1|PACid:27156013	14 kDa	2	0	2	2	2	2	0.281	0	0.281	0.281	0.281	0.281
ribosomal protein L9	Phvul.011G086500.1|PACid:27151903	22 kDa	3	2	3	2	4	2	0.23	0.138	0.189	0.138	0.189	0.138
ribosomal protein S1	Phvul.006G121100.1|PACid:27166308	44 kDa	0	0	0	0	2	2	0	0	0	0	0.16	0.16
ribosomal protein S1	Phvul.003G118600.1|PACid:27143910	45 kDa	4	0	4	0	5	4	0.153	0	0.133	0	0.177	0.153
Ribosomal protein S11 family protein	Phvul.006G095400.1|PACid:27167311 (+2)	16 kDa	2	0	2	0	0	0	0.16	0	0.16	0	0	0
Ribosomal protein S13/S18 family	Phvul.007G080500.1|PACid:27160297 (+1)	18 kDa	4	0	0	0	0	2	0.237	0	0	0	0	0.125
ribosomal protein S13A	Phvul.010G082900.1|PACid:27140954	17 kDa	3	0	2	0	0	0	0.166	0	0.126	0	0	0
Ribosomal protein S19 family protein	Phvul.002G320200.1|PACid:27171246 (+2)	17 kDa	0	0	0	0	0	3	0	0	0	0	0	0.197
Ribosomal protein S19e family protein	Phvul.005G018600.1|PACid:27149117 (+1)	16 kDa	2	0	0	3	2	3	0.14	0	0	0.245	0.189	0.147
Ribosomal protein S1Unknownp/S2Unknowne family protein	Phvul.006G055300.1|PACid:27164994	22 kDa	0	0	0	0	2	2	0	0	0	0	0.2	0.205
Ribosomal protein S1Unknownp/S2Unknowne family protein	Phvul.001G139900.1|PACid:27162563	14 kDa	2	0	0	0	0	0	0.156	0	0	0	0	0
Ribosomal protein S21 family protein	Phvul.001G094500.1|PACid:27164512	20 kDa	3	0	0	2	2	3	0.3	0	0	0.224	0.2	0.253
Ribosomal protein S3Ae	Phvul.007G060700.1|PACid:27159612	30 kDa	0	0	2	0	0	0	0	0	0.103	0	0	0
Ribosomal protein S4	Phvul.003G191200.1|PACid:27143899 (+2)	23 kDa	4	0	0	0	0	0	0.142	0	0	0	0	0
Ribosomal protein S4 (RPS4A) family protein	Phvul.008G221000.1|PACid:27153328 (+1)	30 kDa	4	0	3	0	0	2	0.152	0	0.106	0	0	0.0682
Ribosomal protein S5 domain 2-like superfamily protein	Phvul.002G324300.1|PACid:27169399	17 kDa	2	0	0	0	0	0	0.184	0	0	0	0	0
Ribosomal protein S5 family protein	Phvul.003G018300.1|PACid:27144624	30 kDa	3	3	3	2	3	3	0.14	0.14	0.14	0.0996	0.14	0.14
Ribosomal protein S5 family protein	Phvul.002G229700.1|PACid:27168387	32 kDa	2	2	0	0	0	2	0.0532	0.0664	0	0	0	0.0532
Ribosomal protein S5/Elongation factor G/III/V family protein	Phvul.005G058100.1|PACid:27149231 (+1)	94 kDa	5	4	4	4	4	4	0.132	0.102	0.0949	0.089	0.089	0.089
Ribosomal protein S6e	Phvul.006G184300.1|PACid:27165294	28 kDa	2	0	0	0	0	0	0.145	0	0	0	0	0
Ribosomal protein S7e family protein	Phvul.002G317200.1|PACid:27168404 (+1)	22 kDa	2	0	0	0	0	0	0.12	0	0	0	0	0
Ribosomal protein S7p/S5e family protein	Phvul.002G050300.1|PACid:27169501	10 kDa	2	0	0	0	0	2	0.209	0	0	0	0	0.209
Ribosomal protein S8e family protein	Phvul.010G024600.1|PACid:27140318	25 kDa	2	0	0	0	0	0	0.133	0	0	0	0	0
ribosomal protein S9	Phvul.001G017500.1|PACid:27162426	22 kDa	2	0	0	0	0	0	0.144	0	0	0	0	0
ribosome recycling factor, chloroplast precursor	Phvul.007G172400.1|PACid:27161702	30 kDa	4	5	5	8	4	5	0.233	0.259	0.259	0.335	0.233	0.259
Ribulose bisphosphate carboxylase (small chain) family protein	Phvul.004G064800.1|PACid:27157331 (+1)	20 kDa	14	14	13	11	13	13	0.628	0.628	0.628	0.606	0.628	0.628
ribulose-bisphosphate carboxylases	Phvul.009G144500.1|PACid:27148212	29 kDa	2	0	0	0	0	0	0.146	0	0	0	0	0
ribulose-bisphosphate carboxylases	Phvul.011G089000.1|PACid:27150529	10 kDa	4	4	4	4	4	4	0.253	0.253	0.253	0.253	0.253	0.253
RmlC-like cupins superfamily protein	Phvul.007G113400.1|PACid:27159828	11 kDa	2	3	2	3	3	2	0.245	0.337	0.245	0.337	0.337	0.245
RNA polymerase Rpb1, domain 2	REVERSE_Phvul.011G206900.1|PACid:27152868-DECOY	227 kDa	0	2	0	0	0	0	0	0.0112	0	0	0	0
RNA-binding (RRM/RBD/RNP motifs) family protein	Phvul.005G039000.1|PACid:27150205	26 kDa	5	5	5	6	6	6	0.382	0.278	0.373	0.382	0.382	0.382
RNA-binding (RRM/RBD/RNP motifs) family protein	Phvul.007G130600.1|PACid:27159662 (+1)	48 kDa	0	0	2	2	3	3	0	0	0.0905	0.0905	0.122	0.122
RNA-binding (RRM/RBD/RNP motifs) family protein	Phvul.007G231600.1|PACid:27159497	31 kDa	0	0	2	0	0	0	0	0	0.115	0	0	0
RNA-binding (RRM/RBD/RNP motifs) family protein	Phvul.007G150700.1|PACid:27158969	30 kDa	5	4	7	2	6	8	0.433	0.302	0.469	0.109	0.578	0.542
RNA-binding (RRM/RBD/RNP motifs) family protein	Phvul.009G033600.1|PACid:27145380 (+1)	34 kDa	2	3	0	0	3	0	0.0784	0.17	0	0	0.17	0
RNA-binding KH domain-containing protein	Phvul.007G178400.1|PACid:27161424	63 kDa	0	0	0	0	0	2	0	0	0	0	0	0.0392
root hair specific 19	Phvul.003G236500.1|PACid:27142628	36 kDa	2	0	0	0	0	2	0.0638	0	0	0	0	0.0699
rotamase CYP 3	Phvul.011G026900.1|PACid:27152345	18 kDa	8	7	8	7	6	9	0.709	0.552	0.593	0.552	0.395	0.75
rotamase CYP 4	Phvul.001G219400.1|PACid:27164761	28 kDa	3	4	4	5	4	4	0.124	0.178	0.151	0.193	0.151	0.178
rubisco activase	Phvul.008G192400.1|PACid:27154954	52 kDa	11	13	9	11	11	10	0.379	0.407	0.371	0.407	0.444	0.394
rubisco activase	Phvul.001G234300.1|PACid:27161781	48 kDa	14	16	13	20	17	15	0.315	0.367	0.279	0.503	0.345	0.304
rubredoxin family protein	Phvul.002G037500.1|PACid:27170020	29 kDa	0	2	2	4	2	2	0	0.13	0.13	0.285	0.13	0.13
Rubredoxin-like superfamily protein	Phvul.010G153300.1|PACid:27140618	18 kDa	0	0	2	0	0	2	0	0	0.228	0	0	0.228
S phase kinase-associated protein 1	Phvul.003G265900.1|PACid:27144802	18 kDa	0	0	2	0	0	0	0	0	0.258	0	0	0
S-adenosyl-L-homocysteine hydrolase	Phvul.003G051200.1|PACid:27144134	53 kDa	6	0	4	0	0	0	0.173	0	0.12	0	0	0
S-adenosylmethionine synthetase 1	Phvul.001G216700.1|PACid:27164697	43 kDa	2	0	0	0	3	3	0.124	0	0	0	0.157	0.157
S-adenosylmethionine synthetase family protein	Phvul.003G120000.1|PACid:27144204	43 kDa	4	2	4	3	4	5	0.158	0.0765	0.161	0.0995	0.161	0.186
sedoheptulose-bisphosphatase	Phvul.001G240200.1|PACid:27164106	42 kDa	10	14	10	11	14	12	0.318	0.406	0.264	0.302	0.45	0.398
semialdehyde dehydrogenase family protein	Phvul.002G323900.1|PACid:27170189	41 kDa	3	0	4	0	0	3	0.147	0	0.168	0	0	0.147
serine hydroxymethyltransferase 4	Phvul.001G266600.1|PACid:27162877 (+1)	52 kDa	6	0	3	2	4	3	0.163	0	0.102	0.0573	0.115	0.0913
serine transhydroxymethyltransferase 1	Phvul.003G286600.1|PACid:27144203	57 kDa	8	16	7	5	7	8	0.187	0.357	0.166	0.12	0.176	0.17
seryl-tRNA synthetase / serine--tRNA ligase	Phvul.007G180500.1|PACid:27159615 (+1)	51 kDa	2	3	0	0	0	0	0.0805	0.116	0	0	0	0
SHV3-like 2	Phvul.006G050400.1|PACid:27165410	71 kDa	0	0	0	0	0	2	0	0	0	0	0	0.0372
Single hybrid motif superfamily protein	Phvul.007G233300.1|PACid:27158913	20 kDa	0	0	2	0	0	0	0	0	0.151	0	0	0
Single hybrid motif superfamily protein	Phvul.002G006000.1|PACid:27171133	18 kDa	3	6	6	8	7	6	0.297	0.624	0.679	0.679	0.745	0.624
small ubiquitin-like modifier 2	Phvul.006G047600.1|PACid:27166464	11 kDa	0	0	2	3	0	2	0	0	0.12	0.28	0	0.12
SOUL heme-binding family protein	Phvul.011G173900.1|PACid:27150755	25 kDa	2	5	7	4	3	4	0.115	0.327	0.438	0.327	0.181	0.265
starch branching enzyme 2.2	Phvul.001G187600.1|PACid:27163434	99 kDa	0	2	0	0	0	0	0	0.0598	0	0	0	0
Stress responsive alpha-beta barrel domain protein	Phvul.009G228300.1|PACid:27147436	27 kDa	3	3	4	2	3	4	0.211	0.211	0.211	0.211	0.211	0.275
Stress responsive alpha-beta barrel domain protein	Phvul.003G132200.1|PACid:27143060	28 kDa	2	0	0	2	0	0	0.145	0	0	0.145	0	0
stress-inducible protein, putative	Phvul.002G060800.1|PACid:27170425	65 kDa	0	0	0	0	0	2	0	0	0	0	0	0.0293
subtilase 4.12	Phvul.001G238100.1|PACid:27163105	78 kDa	17	9	17	6	5	17	0.326	0.199	0.328	0.134	0.116	0.335
Subtilase family protein	Phvul.003G237300.1|PACid:27142189	84 kDa	0	0	3	0	0	0	0	0	0.0642	0	0	0
Subtilase family protein	Phvul.008G228700.1|PACid:27153723 (+1)	80 kDa	3	0	7	0	0	5	0.0914	0	0.187	0	0	0.169
Subtilase family protein	Phvul.010G128600.1|PACid:27141368	83 kDa	4	5	5	9	6	5	0.081	0.108	0.105	0.233	0.161	0.107
Subtilisin-like serine endopeptidase family protein	Phvul.008G229500.1|PACid:27155948	76 kDa	6	12	7	12	12	14	0.169	0.297	0.195	0.271	0.273	0.347
Subtilisin-like serine endopeptidase family protein	Phvul.008G229400.1|PACid:27155274	74 kDa	0	0	0	0	0	2	0	0	0	0	0	0.205
Subtilisin-like serine endopeptidase family protein	Phvul.009G018600.1|PACid:27147831	81 kDa	0	2	0	0	0	0	0	0.0599	0	0	0	0
Tautomerase/MIF superfamily protein	Phvul.008G092500.1|PACid:27153936	12 kDa	2	3	3	3	3	2	0.278	0.374	0.374	0.374	0.374	0.278
TCP-1/cpn6Unknown chaperonin family protein	Phvul.005G051700.1|PACid:27149677	63 kDa	11	8	11	5	10	11	0.277	0.184	0.251	0.121	0.246	0.278
Tetratricopeptide repeat (TPR)-like superfamily protein	Phvul.001G235600.1|PACid:27162446	24 kDa	7	7	8	9	7	7	0.4	0.4	0.467	0.462	0.378	0.4
Tetratricopeptide repeat (TPR)-like superfamily protein	Phvul.001G081700.1|PACid:27162130	58 kDa	0	0	2	0	0	0	0	0	0.0743	0	0	0
Tetratricopeptide repeat (TPR)-like superfamily protein	Phvul.009G195600.1|PACid:27146782 (+2)	198 kDa	0	0	0	0	2	0	0	0	0	0	0.0189	0
Tetratricopeptide repeat (TPR)-like superfamily protein	Phvul.009G050400.1|PACid:27147124	25 kDa	7	9	8	11	10	8	0.398	0.419	0.419	0.453	0.453	0.419
thiazole biosynthetic enzyme, chloroplast (ARA6) (THI1) (THI4)	Phvul.007G052900.1|PACid:27160951	38 kDa	0	2	0	0	0	0	0	0.0676	0	0	0	0
thioredoxin F2	Phvul.008G053300.1|PACid:27153949	20 kDa	3	4	3	6	3	4	0.16	0.215	0.149	0.481	0.149	0.215
thioredoxin family protein	Phvul.007G215900.1|PACid:27159210	40 kDa	2	0	3	0	0	2	0.0826	0	0.124	0	0	0.0826
thioredoxin M-type 4	Phvul.005G071200.1|PACid:27149735	20 kDa	5	6	5	6	5	4	0.291	0.297	0.291	0.297	0.231	0.225
thioredoxin M-type 4	Phvul.011G157700.1|PACid:27151243	19 kDa	0	0	0	2	0	0	0	0	0	0.253	0	0
thioredoxin M-type 4	Phvul.009G133900.1|PACid:27147068	20 kDa	3	5	2	9	5	5	0.171	0.269	0.143	0.52	0.269	0.44
Thioredoxin superfamily protein	Phvul.002G023500.1|PACid:27170374	29 kDa	0	2	0	0	0	0	0	0.0973	0	0	0	0
Thioredoxin superfamily protein	Phvul.001G186000.1|PACid:27164196	23 kDa	4	5	5	4	4	2	0.273	0.356	0.352	0.278	0.315	0.153
Thioredoxin superfamily protein	Phvul.006G072600.1|PACid:27167441	30 kDa	0	2	2	2	0	2	0	0.109	0.109	0.109	0	0.109
Thioredoxin superfamily protein	Phvul.003G128100.1|PACid:27144461	13 kDa	0	3	0	2	0	0	0	0.288	0	0.288	0	0
thioredoxin X	Phvul.007G015500.1|PACid:27160930	20 kDa	2	2	0	2	2	2	0.141	0.141	0	0.141	0.141	0.141
thioredoxin Y1	Phvul.007G080600.1|PACid:27160155	20 kDa	2	2	2	2	2	2	0.166	0.166	0.166	0.166	0.166	0.166
thioredoxin-dependent peroxidase 1	Phvul.004G166100.1|PACid:27158250	17 kDa	3	2	0	2	3	3	0.241	0.241	0	0.241	0.253	0.222
thylakoid lumen 15.Unknown kDa protein	Phvul.007G219800.1|PACid:27160258	25 kDa	0	3	3	4	5	0	0	0.14	0.144	0.227	0.227	0
thylakoid rhodanese-like	Phvul.010G112100.1|PACid:27140271	47 kDa	3	3	3	2	2	3	0.16	0.16	0.16	0.164	0.115	0.16
thylakoidal ascorbate peroxidase	Phvul.009G126500.1|PACid:27147739 (+1)	48 kDa	0	2	7	5	2	2	0	0.108	0.264	0.161	0.0665	0.115
Tim1Unknown/DDP family zinc finger protein	Phvul.011G064100.1|PACid:27151760	11 kDa	0	0	2	3	0	3	0	0	0.237	0.323	0	0.323
Transcriptional coactivator/pterin dehydratase	Phvul.007G240500.1|PACid:27160038	24 kDa	2	0	2	3	3	2	0.222	0	0.185	0.278	0.278	0.185
Transducin family protein / WD-4Unknown repeat family protein	Phvul.009G232200.1|PACid:27147801	56 kDa	0	0	0	0	0	2	0	0	0	0	0	0.062
Transducin/WD4Unknown repeat-like superfamily protein	Phvul.002G070400.1|PACid:27167818	36 kDa	3	2	3	3	3	6	0.126	0.0736	0.126	0.117	0.126	0.224
Transketolase	Phvul.003G037400.1|PACid:27144133	79 kDa	2	0	2	0	0	0	0.101	0	0.063	0	0	0
Transketolase	Phvul.007G006600.1|PACid:27159083	80 kDa	15	16	14	10	11	8	0.334	0.343	0.307	0.177	0.253	0.189
Transketolase family protein	Phvul.008G000800.1|PACid:27154521	39 kDa	0	2	0	0	0	0	0	0.138	0	0	0	0
Translation elongation factor EF1B/ribosomal protein S6 family protein	Phvul.001G007700.1|PACid:27162385	25 kDa	4	3	3	0	4	4	0.294	0.238	0.19	0	0.238	0.316
Translation elongation factor EFG/EF2 protein	Phvul.003G217300.1|PACid:27143871	86 kDa	2	0	0	0	0	0	0.0424	0	0	0	0	0
Translation initiation factor eIF3 subunit	Phvul.004G141100.1|PACid:27157679	26 kDa	0	0	3	0	0	2	0	0	0.246	0	0	0.11
translationally controlled tumor protein	Phvul.009G248700.1|PACid:27147167	19 kDa	3	0	4	0	3	3	0.228	0	0.323	0	0.228	0.228
translocase of outer membrane 2Unknown kDa subunit 3	Phvul.004G072400.1|PACid:27156942	23 kDa	0	0	0	0	0	2	0	0	0	0	0	0.168
translocase of the inner mitochondrial membrane 13	Phvul.006G006100.1|PACid:27166548	9 kDa	0	2	3	2	2	0	0	0.43	0.547	0.43	0.43	0
translocon at the outer envelope membrane of chloroplasts 159	Phvul.002G246700.1|PACid:27169011	145 kDa	0	0	4	0	0	0	0	0	0.071	0	0	0
triosephosphate isomerase	Phvul.005G144100.1|PACid:27148403	27 kDa	11	11	10	2	10	9	0.573	0.549	0.577	0.0988	0.549	0.51
triosephosphate isomerase	Phvul.001G181000.1|PACid:27163856	33 kDa	11	13	14	11	12	13	0.537	0.55	0.55	0.466	0.553	0.599
tubulin alpha-2 chain	Phvul.002G007900.1|PACid:27167631	50 kDa	3	0	2	0	0	0	0.0732	0	0.0776	0	0	0
tubulin beta 8	Phvul.006G126100.1|PACid:27165097	50 kDa	8	4	3	2	4	5	0.217	0.0872	0.0694	0.0694	0.0917	0.154
tubulin folding cofactor A (KIESEL)	Phvul.008G274500.1|PACid:27155300	13 kDa	0	0	2	0	0	0	0	0	0.319	0	0	0
Tubulin/FtsZ family protein	Phvul.001G189700.1|PACid:27164336	50 kDa	0	0	0	0	3	0	0	0	0	0	0.107	0
U2 small nuclear ribonucleoprotein A	Phvul.003G001500.1|PACid:27142150 (+1)	32 kDa	2	2	2	0	2	3	0.105	0.101	0.105	0	0.101	0.15
Ubiquinol-cytochrome C reductase hinge protein	Phvul.006G209400.1|PACid:27167072	8 kDa	0	0	2	0	0	2	0	0	0.333	0	0	0.348
ubiquitin E2 variant 1D-4	Phvul.007G270100.1|PACid:27158769	17 kDa	2	0	4	0	0	3	0.164	0	0.233	0	0	0.233
Ubiquitin-activating enzyme active site	REVERSE_Phvul.006G072200.1|PACid:27167354-DECOY (+1)	121 kDa	0	0	2	0	0	0	0	0	0.0267	0	0	0
UDP-glucose pyrophosphorylase 2	Phvul.008G240600.1|PACid:27154606	52 kDa	4	8	7	0	4	3	0.156	0.309	0.264	0	0.149	0.0959
UDP-glucosyl transferase 78D2	Phvul.006G201100.1|PACid:27166155	50 kDa	2	0	0	0	0	0	0.0923	0	0	0	0	0
Uncharacterised BCR, YbaB family COGUnknown718	Phvul.005G005700.1|PACid:27150107	21 kDa	0	3	2	3	4	2	0	0.214	0.143	0.158	0.27	0.143
Unknown	Phvul.003G074600.1|PACid:27143731	31 kDa	0	0	0	3	3	2	0	0	0	0.181	0.227	0.119
Unknown	Phvul.002G041600.1|PACid:27168988	18 kDa	0	0	0	5	2	0	0	0	0	0.36	0.189	0
Unknown	Phvul.008G118700.1|PACid:27154152	14 kDa	2	2	2	2	0	2	0.169	0.169	0.169	0.169	0	0.169
Unknown	Phvul.001G252000.1|PACid:27162615	32 kDa	0	0	0	2	0	0	0	0	0	0.119	0	0
Unknown	Phvul.002G069000.1|PACid:27170749	20 kDa	0	0	0	2	0	0	0	0	0	0.166	0	0
Unknown	Phvul.007G091500.1|PACid:27159790	16 kDa	0	0	0	3	0	0	0	0	0	0.417	0	0
Unknown	Phvul.007G105600.1|PACid:27160650	15 kDa	0	0	0	2	0	0	0	0	0	0.368	0	0
Unknown	Phvul.008G203100.1|PACid:27154593 (+1)	13 kDa	0	0	0	2	0	0	0	0	0	0.186	0	0
Unknown	Phvul.009G043000.1|PACid:27147756	6 kDa	0	0	0	2	0	0	0	0	0	0.231	0	0
Unknown	Phvul.010G094000.1|PACid:27141474	26 kDa	0	0	0	3	0	0	0	0	0	0.163	0	0
Unknown	Phvul.011G024500.1|PACid:27150936	154 kDa	0	0	4	0	0	0	0	0	0.0523	0	0	0
Unknown	Phvul.010G014200.1|PACid:27141106	21 kDa	2	0	2	3	0	2	0.168	0	0.168	0.264	0	0.168
Unknown	Phvul.006G082200.1|PACid:27166837	27 kDa	4	3	4	0	4	2	0.267	0.168	0.293	0	0.207	0.121
Unknown	Phvul.006G065100.1|PACid:27165277	10 kDa	0	3	3	3	2	2	0	0.264	0.264	0.264	0.264	0.264
Unknown	Phvul.006G159000.1|PACid:27166926	36 kDa	0	2	0	3	0	2	0	0.145	0	0.181	0	0.145
Unknown	Phvul.007G276300.1|PACid:27158924	25 kDa	10	0	12	0	0	11	0.615	0	0.646	0	0	0.513
Unknown	Phvul.007G080400.1|PACid:27161686	29 kDa	4	4	4	4	4	4	0.325	0.325	0.325	0.325	0.325	0.325
Unknown	Phvul.004G031300.1|PACid:27156615	52 kDa	3	0	7	0	0	6	0.0922	0	0.201	0	0	0.174
Unknown	Phvul.008G216800.1|PACid:27154777	15 kDa	0	2	2	2	0	0	0	0.422	0.422	0.422	0	0
Unknown	Phvul.010G096700.1|PACid:27141142 (+1)	20 kDa	5	0	5	0	0	5	0.505	0	0.505	0	0	0.505
Unknown	Phvul.006G047400.1|PACid:27167346	11 kDa	4	5	5	5	4	5	0.424	0.424	0.424	0.444	0.424	0.424
Unknown	Phvul.006G142900.1|PACid:27166865	17 kDa	0	2	4	3	0	3	0	0.298	0.317	0.298	0	0.298
Unknown	Phvul.009G082000.1|PACid:27146310	25 kDa	0	2	0	2	0	0	0	0.114	0	0.154	0	0
Unknown	Phvul.009G006700.1|PACid:27148259	18 kDa	0	2	0	2	0	0	0	0.241	0	0.241	0	0
Unknown	Phvul.002G299900.1|PACid:27170530	16 kDa	2	0	2	2	2	0	0.214	0	0.214	0.214	0.214	0
Unknown	Phvul.004G172100.1|PACid:27156725	34 kDa	0	0	3	0	0	3	0	0	0.24	0	0	0.24
Unknown	Phvul.003G059800.1|PACid:27142374	17 kDa	2	2	2	2	0	2	0.103	0.103	0.103	0.103	0	0.103
Unknown	Phvul.007G163900.1|PACid:27159716	20 kDa	0	2	0	0	2	0	0	0.128	0	0	0.128	0
uracil phosphoribosyltransferase	Phvul.010G015300.1|PACid:27140500	31 kDa	0	0	2	4	0	2	0	0	0.145	0.233	0	0.145
uridylyltransferase-related	Phvul.005G181700.1|PACid:27149150	30 kDa	5	5	5	3	4	3	0.275	0.275	0.275	0.179	0.221	0.143
Uroporphyrinogen decarboxylase	Phvul.001G248800.1|PACid:27164776	43 kDa	4	0	3	0	0	2	0.189	0	0.152	0	0	0.101
vacuolar membrane ATPase 1Unknown	Phvul.007G220600.1|PACid:27161482	12 kDa	0	0	0	4	2	0	0	0	0	0.427	0.173	0
voltage dependent anion channel 1	Phvul.008G043800.1|PACid:27155470	30 kDa	0	2	0	0	0	0	0	0.152	0	0	0	0
voltage dependent anion channel 1	Phvul.003G069300.1|PACid:27144157	30 kDa	2	3	0	0	3	2	0.0978	0.138	0	0	0.138	0.087
WPP domain protein 2	Phvul.009G068700.1|PACid:27145715	17 kDa	0	0	2	2	0	2	0	0	0.241	0.241	0	0.241

## Sheet: Supplementary Table S2
Supplementary Table 2. Alignment of identified proteins to Phaseolus vulgaris genome
Chromosome	Protein	Chromosome Start Location (bp)	Chromosome End Location (bp)	Transcript Name
1	chloroplastic drought-induced stress protein of 32 kD	273444	275401	Phvul.001G002100.1
1	Chaperone protein htpG family protein	462621	467321	Phvul.001G005200.1
1	DnaJ/Hsp4Unknown cysteine-rich domain superfamily protein	603028	606395	Phvul.001G007500.1
1	Translation elongation factor EF1B/ribosomal protein S6 family protein	611572	613854	Phvul.001G007700.1
1	Papain family cysteine protease	857213	859808	Phvul.001G009900.1
1	GYF domain-containing protein	1274227	1282595	Phvul.001G015100.3
1	ribosomal protein S9	1463880	1467385	Phvul.001G017500.1
1	phospholipase A 2A	1738878	1742766	Phvul.001G020100.1
1	poly(A) binding protein 2	2069424	2074542	Phvul.001G023500.1
1	Granulin repeat cysteine protease family protein	2190319	2194581	Phvul.001G024500.1
1	glycine decarboxylase P-protein 2	3411245	3418347	Phvul.001G035500.1
1	glutathione peroxidase 1	4179241	4185058	Phvul.001G041100.1
1	Bifunctional inhibitor/lipid-transfer protein/seed storage 2S albumin superfamily protein	5589718	5590597	Phvul.001G050300.1
1	Protein of unknown function, DUF642	6061570	6067416	Phvul.001G053100.1
1	Tetratricopeptide repeat (TPR)-like superfamily protein	13423594	13433967	Phvul.001G081700.1
1	CCR-like	15213908	15214875	Phvul.001G085200.1
1	Ribosomal protein S21 family protein	20537277	20539547	Phvul.001G094500.1
1	glyceraldehyde 3-phosphate dehydrogenase A subunit	21757626	21760725	Phvul.001G098100.1
1	calmodulin 5	23671381	23672973	Phvul.001G102700.1
1	Co-chaperone GrpE family protein	27979620	27984269	Phvul.001G108000.1
1	Cobalamin-independent synthase family protein	31806487	31811572	Phvul.001G113800.1
1	Nascent polypeptide-associated complex (NAC), alpha subunit family protein	32812043	32814713	Phvul.001G117000.1
1	photosynthetic electron transfer A	32932909	32933887	Phvul.001G117600.1
1	Mog1/PsbP/DUF1795-like photosystem II reaction center PsbP family protein	33593069	33598464	Phvul.001G119100.1
1	chaperonin 1Unknown	34066922	34069333	Phvul.001G120500.1
1	glutamate synthase 1	34828173	34857639	Phvul.001G123900.1
1	beta-1,3-glucanase 1	36431446	36433219	Phvul.001G128500.1
1	Ribosomal protein S1Unknownp/S2Unknowne family protein	38796848	38798629	Phvul.001G139900.1
1	Ribosomal protein L14p/L23e family protein	42495371	42496407	Phvul.001G164200.1
1	GroES-like zinc-binding dehydrogenase family protein	42849540	42852623	Phvul.001G167100.1
1	histone H4	43193767	43194417	Phvul.001G169200.1
1	Pyridoxal-dependent decarboxylase family protein	44075699	44080375	Phvul.001G177300.1
1	ribosomal protein L2	44489506	44490616	Phvul.001G180400.1
1	triosephosphate isomerase	44538573	44542809	Phvul.001G181000.1
1	Thioredoxin superfamily protein	45095259	45096346	Phvul.001G186000.1
1	Enolase	45105118	45109306	Phvul.001G186100.1
1	starch branching enzyme 2.2	45369796	45393043	Phvul.001G187600.1
1	6UnknownS acidic ribosomal protein family	45471000	45472612	Phvul.001G188200.1
1	Tubulin/FtsZ family protein	45594135	45599660	Phvul.001G189700.1
1	2-cysteine peroxiredoxin B	46024014	46026943	Phvul.001G194100.1
1	chloroplast RNA-binding protein 33	46292355	46295878	Phvul.001G196700.1
1	Nucleic acid-binding, OB-fold-like protein	46521813	46523264	Phvul.001G199400.1
1	Ribosomal protein L19e family protein	47384879	47387148	Phvul.001G210100.1
1	CP12 domain-containing protein 2	47640156	47641149	Phvul.001G212900.1
1	ADP-ribosylation factor A1F	47880349	47882559	Phvul.001G215400.1
1	S-adenosylmethionine synthetase 1	47995129	47997685	Phvul.001G216700.1
1	rotamase CYP 4	48193884	48196365	Phvul.001G219400.1
1	Cysteine proteinases superfamily protein	48264157	48272272	Phvul.001G220100.1
1	chloroplast RNA binding	48578615	48582437	Phvul.001G223800.1
1	Photosystem II reaction center PsbP family protein	48594017	48596403	Phvul.001G224100.1
1	Protein of unknown function, DUF538	48605081	48606129	Phvul.001G224400.1
1	haloacid dehalogenase-like hydrolase family protein	48629550	48646751	Phvul.001G224700.1
1	dehydroascorbate reductase 1	49157172	49162701	Phvul.001G230400.1
1	rubisco activase	49528436	49531638	Phvul.001G234300.1
1	Tetratricopeptide repeat (TPR)-like superfamily protein	49616692	49619877	Phvul.001G235600.1
1	subtilase 4.12	49851248	49855978	Phvul.001G238100.1
1	sedoheptulose-bisphosphatase	50013789	50016671	Phvul.001G240200.1
1	biotin/lipoyl attachment domain-containing protein	50586094	50593240	Phvul.001G247000.1
1	Uroporphyrinogen decarboxylase	50698637	50702165	Phvul.001G248800.1
1	Unknown	50965757	50969123	Phvul.001G252000.1
1	glycosylphosphatidylinositol-anchored lipid protein transfer 1	51677293	51680383	Phvul.001G262400.1
1	serine hydroxymethyltransferase 4	51923408	51926241	Phvul.001G266600.1
2	Single hybrid motif superfamily protein	679667	681183	Phvul.002G006000.1
2	tubulin alpha-2 chain	912445	914784	Phvul.002G007900.1
2	Cystathionine beta-synthase (CBS) family protein	1839143	1844389	Phvul.002G016800.1
2	Thioredoxin superfamily protein	2504519	2506392	Phvul.002G023500.1
2	homolog of Synechocystis YCF37	2509413	2510270	Phvul.002G023600.1
2	photosystem II subunit O-2	2528657	2530267	Phvul.002G024000.1
2	hydroxymethylbilane synthase	3463605	3466680	Phvul.002G034500.1
2	rubredoxin family protein	3641020	3644126	Phvul.002G037500.1
2	Unknown	3962475	3964687	Phvul.002G041600.1
2	O-acetylserine (thiol) lyase (OAS-TL) isoform A1	4201899	4207392	Phvul.002G045200.1
2	2Fe-2S ferredoxin-like superfamily protein	4217310	4218109	Phvul.002G045400.1
2	Ribosomal protein S7p/S5e family protein	4690486	4690743	Phvul.002G050300.1
2	Calcium-binding EF-hand family protein	6500779	6501668	Phvul.002G060300.1
2	stress-inducible protein, putative	6566281	6570087	Phvul.002G060800.1
2	Pentapeptide repeat-containing protein	6663782	6666712	Phvul.002G061100.1
2	Unknown	8750392	8752208	Phvul.002G069000.1
2	Transducin/WD4Unknown repeat-like superfamily protein	9669003	9673009	Phvul.002G070400.1
2	carbonic anhydrase 2	9739735	9750255	Phvul.002G071200.1
2	Ribosomal protein L1Unknown family protein	10749460	10751879	Phvul.002G074600.1
2	pyruvate dehydrogenase complex E1 alpha subunit	11488642	11495317	Phvul.002G077600.1
2	Cyclophilin-like peptidyl-prolyl cis-trans isomerase family protein	14183915	14188956	Phvul.002G088300.1
2	Leucine-rich repeat (LRR) family protein	16046657	16048624	Phvul.002G092200.1
2	GroES-like family protein	17351848	17352611	Phvul.002G095400.1
2	Cytochrome c	19221783	19227464	Phvul.002G098700.1
2	ferredoxin-NADP(+)-oxidoreductase 2	21838334	21841242	Phvul.002G108000.1
2	acyl-CoA-binding protein 6	25708291	25710270	Phvul.002G127700.1
2	CLP protease P4	25789285	25792228	Phvul.002G128500.1
2	phosphoribulokinase	26398284	26401539	Phvul.002G133100.1
2	Plastid-lipid associated protein PAP / fibrillin family protein	27083129	27087794	Phvul.002G137800.1
2	alanine-2-oxoglutarate aminotransferase 2	29130775	29138497	Phvul.002G150800.1
2	Double Clp-N motif protein	29209436	29215678	Phvul.002G151400.1
2	osmotin 34	29701039	29702099	Phvul.002G155500.1
2	glutathione peroxidase 8	29898072	29904106	Phvul.002G157200.1
2	nodulin-related protein 1	31069121	31069705	Phvul.002G168000.1
2	Protein prenylyltransferase superfamily protein	34239191	34240469	Phvul.002G187000.1
2	FK5Unknown6-binding protein 13	34267806	34270405	Phvul.002G187500.1
2	lysm domain GPI-anchored protein 2 precursor	34408747	34412176	Phvul.002G188800.1
2	FtsH extracellular protease family	34689955	34693551	Phvul.002G190900.1
2	chlorophyll A/B binding protein 1	35352125	35353122	Phvul.002G196400.1
2	double-stranded DNA-binding family protein	35594910	35597761	Phvul.002G197500.1
2	polygalacturonase inhibiting protein 1	36117844	36119182	Phvul.002G201800.1
2	light harvesting complex photosystem II subunit 6	36761947	36763367	Phvul.002G207500.1
2	ortholog of human splicing factor SC35	36859261	36863374	Phvul.002G208600.1
2	MLP-like protein 423	36945818	36946604	Phvul.002G209400.1
2	Cox19-like CHCH family protein	37602908	37606183	Phvul.002G214000.1
2	mitochondrial HSO7Unknown 2	37816115	37819661	Phvul.002G215800.1
2	NAD(P)-linked oxidoreductase superfamily protein	37913388	37916036	Phvul.002G216600.1
2	peroxisomal NAD-malate dehydrogenase 2	37936305	37939888	Phvul.002G216800.1
2	Pyridoxal phosphate (PLP)-dependent transferases superfamily protein	37966682	37973155	Phvul.002G217100.1
2	Quinone reductase family protein	38306710	38309857	Phvul.002G219700.1
2	Clathrin light chain protein	39204434	39207288	Phvul.002G227200.1
2	Ribosomal protein S5 family protein	39553547	39555697	Phvul.002G229700.1
2	Bifunctional inhibitor/lipid-transfer protein/seed storage 2S albumin superfamily protein	40054411	40055880	Phvul.002G234400.1
2	NAD(P)-binding Rossmann-fold superfamily protein	40797371	40804058	Phvul.002G241100.1
2	translocon at the outer envelope membrane of chloroplasts 159	41312460	41316966	Phvul.002G246700.1
2	evolutionarily conserved C-terminal region 2	41345444	41349656	Phvul.002G247000.1
2	protein containing PDZ domain, a K-box domain, and a TPR region	41393844	41397047	Phvul.002G247200.1
2	DNAJ heat shock family protein	42407428	42413552	Phvul.002G257300.1
2	Haloacid dehalogenase-like hydrolase (HAD) superfamily protein	42414913	42418029	Phvul.002G257400.1
2	FK5Unknown6-binding protein 16-2	42868338	42870594	Phvul.002G262400.1
2	copper ion binding;cobalt ion binding;zinc ion binding	43115576	43119226	Phvul.002G265700.1
2	Histone superfamily protein	43425690	43426423	Phvul.002G269200.1
2	photosystem I reaction center subunit PSI-N, chloroplast, putative / PSI-N, putative (PSAN)	43432093	43433284	Phvul.002G269400.1
2	acyl carrier protein 4	44647673	44648803	Phvul.002G282800.1
2	osmotin 34	45042905	45043859	Phvul.002G286500.1
2	osmotin 34	45052530	45053480	Phvul.002G286600.1
2	Nucleic acid-binding, OB-fold-like protein	45111350	45118167	Phvul.002G287600.1
2	glutathione peroxidase 6	45200806	45203017	Phvul.002G288700.1
2	Nucleoside diphosphate kinase family protein	46086606	46089528	Phvul.002G297900.1
2	Unknown	46252297	46254357	Phvul.002G299900.1
2	Heat shock protein 7Unknown (Hsp 7Unknown) family protein	46357082	46360857	Phvul.002G301400.1
2	acetyl Co-enzyme a carboxylase biotin carboxylase subunit	46519769	46528964	Phvul.002G302900.1
2	profilin 2	46982808	46984730	Phvul.002G307600.1
2	NADP-malic enzyme 3	47120072	47126513	Phvul.002G309600.1
2	Glyoxalase/Bleomycin resistance protein/Dioxygenase superfamily protein	47210613	47214578	Phvul.002G310700.1
2	ATP-dependent caseinolytic (Clp) protease/crotonase family protein	47563603	47569244	Phvul.002G314900.1
2	Ribosomal protein S7e family protein	47764190	47766326	Phvul.002G317200.1
2	Ribosomal protein S19 family protein	47999699	48001370	Phvul.002G320200.1
2	semialdehyde dehydrogenase family protein	48264223	48267419	Phvul.002G323900.1
2	Ribosomal protein S5 domain 2-like superfamily protein	48291578	48292439	Phvul.002G324300.1
2	26S proteasome regulatory complex, non-ATPase subcomplex, Rpn2/Psmd1 subunit	48332458	48338724	Phvul.002G324700.1
2	Calcium-binding EF-hand family protein	48782930	48784258	Phvul.002G329300.1
3	Peptidase M2Unknown/M25/M4Unknown family protein	66460	71228	Phvul.003G001200.1
3	U2 small nuclear ribonucleoprotein A	89303	93248	Phvul.003G001500.1
3	Ribosomal protein S5 family protein	1627393	1629500	Phvul.003G018300.1
3	Ribosomal protein L6 family protein	2284422	2286554	Phvul.003G025200.1
3	alpha-xylosidase 1	3533567	3538689	Phvul.003G035400.1
3	Transketolase	3756406	3760366	Phvul.003G037400.1
3	reversibly glycosylated polypeptide 3	4298431	4301589	Phvul.003G040000.1
3	poly(A) binding protein 2	5644470	5653695	Phvul.003G047500.1
3	S-adenosyl-L-homocysteine hydrolase	6278173	6280530	Phvul.003G051200.1
3	Unknown	8031703	8032643	Phvul.003G059800.1
3	O-acetylserine (thiol) lyase isoform C	8088496	8093217	Phvul.003G060200.1
3	Oxidoreductase, zinc-binding dehydrogenase family protein	8131771	8134526	Phvul.003G060300.1
3	DC1 domain-containing protein	8253476	8256522	Phvul.003G061100.1
3	voltage dependent anion channel 1	10252864	10255289	Phvul.003G069300.1
3	Unknown	11517261	11521425	Phvul.003G074600.1
3	glyoxalase I homolog	12559560	12562806	Phvul.003G079700.1
3	Glycine cleavage T-protein family	12805744	12808732	Phvul.003G080400.1
3	Nucleotide-diphospho-sugar transferases superfamily protein	18349753	18357554	Phvul.003G090900.1
3	MLP-like protein 423	27013976	27014992	Phvul.003G109100.1
3	MLP-like protein 423	27040486	27041443	Phvul.003G109200.1
3	ribosomal protein S1	29592663	29596218	Phvul.003G118600.1
3	mitochondrial lipoamide dehydrogenase 1	29611860	29614767	Phvul.003G118800.1
3	S-adenosylmethionine synthetase family protein	29879234	29881623	Phvul.003G120000.1
3	Thioredoxin superfamily protein	31382661	31383266	Phvul.003G128100.1
3	chaperonin 2Unknown	31634819	31637358	Phvul.003G128900.1
3	Cysteine proteinases superfamily protein	32022515	32024332	Phvul.003G130600.1
3	germin 3	32093599	32094587	Phvul.003G131400.1
3	Stress responsive alpha-beta barrel domain protein	32256725	32257891	Phvul.003G132200.1
3	Lactoylglutathione lyase / glyoxalase I family protein	32562355	32565250	Phvul.003G134400.1
3	eukaryotic translation initiation factor 4A1	32613214	32616117	Phvul.003G134800.1
3	nucleosome assembly protein 1;2	32698187	32701275	Phvul.003G135500.1
3	MIF4G domain-containing protein / MA3 domain-containing protein	35979872	35985656	Phvul.003G154900.1
3	aldehyde dehydrogenase 11A3	36266403	36270902	Phvul.003G157200.1
3	DnaJ/Hsp4Unknown cysteine-rich domain superfamily protein	37290237	37293528	Phvul.003G164500.1
3	chloroplast thylakoid lumen protein	37537985	37541226	Phvul.003G166300.1
3	blue-copper-binding protein	37562145	37563050	Phvul.003G166500.1
3	Unknown	37573110	37574598	Phvul.003G166700.1
3	Unknown	38146563	38153463	Phvul.003G170500.1
3	Calcineurin-like phosphoesterase	38148030	38153463	Phvul.003G170500.2
3	purple acid phosphatase 26	38155671	38157766	Phvul.003G170600.1
3	Cyclophilin-like peptidyl-prolyl cis-trans isomerase family protein	39042415	39044360	Phvul.003G178500.1
3	calcium sensing receptor	39177548	39180555	Phvul.003G180100.1
3	glycine-rich RNA-binding protein 3	39647927	39651235	Phvul.003G184700.1
3	photosystem I subunit F	39832847	39833886	Phvul.003G186300.1
3	D-ribulose-5-phosphate-3-epimerase	40089190	40094328	Phvul.003G188800.1
3	malate dehydrogenase	40187069	40189414	Phvul.003G189700.1
3	Ribosomal protein S4	40350368	40351795	Phvul.003G191200.1
3	peroxin 14	41344917	41359097	Phvul.003G200200.1
3	Ribosomal protein L18e/L15 superfamily protein	41874737	41875699	Phvul.003G204100.1
3	RAB GTPase homolog E1B	42011742	42013605	Phvul.003G205600.1
3	chloroplast RNA-binding protein 31B	42106366	42108946	Phvul.003G206700.1
3	nucleoside diphosphate kinase 2	42288907	42292697	Phvul.003G208500.1
3	adenylate kinase 1	42400169	42403848	Phvul.003G209400.1
3	ATP synthase delta-subunit gene	42605820	42607153	Phvul.003G211100.1
3	Glucose-methanol-choline (GMC) oxidoreductase family protein	42824694	42830650	Phvul.003G213000.1
3	HSP7Unknown-interacting protein 1	42964831	42969730	Phvul.003G214200.1
3	Translation elongation factor EFG/EF2 protein	43335890	43340194	Phvul.003G217300.1
3	expansin-like B1	44808997	44811091	Phvul.003G228000.1
3	root hair specific 19	45916983	45919937	Phvul.003G236500.1
3	Subtilase family protein	45982907	45986028	Phvul.003G237300.1
3	Late embryogenesis abundant protein, group 6	45988424	45989429	Phvul.003G237400.1
3	photosystem II subunit P-1	47334201	47339647	Phvul.003G247600.1
3	photosystem II subunit O-2	47641256	47643571	Phvul.003G249800.1
3	peptidylprolyl cis/trans isomerase, NIMA-interacting 1	48884960	48888258	Phvul.003G260800.1
3	Ribosomal protein L2 family	48898245	48899728	Phvul.003G261000.1
3	ferredoxin-NADP(+)-oxidoreductase 1	49073069	49076550	Phvul.003G263200.1
3	cold shock domain protein 1	49081089	49082278	Phvul.003G263300.1
3	S phase kinase-associated protein 1	49270140	49271899	Phvul.003G265900.1
3	ARF-GAP domain 8	51117625	51122683	Phvul.003G285000.1
3	serine transhydroxymethyltransferase 1	51276271	51281707	Phvul.003G286600.1
4	ferredoxin/thioredoxin reductase subunit A (variable subunit) 2	39560	40384	Phvul.004G000400.1
4	actin-11	78942	81526	Phvul.004G001000.1
4	carbonic anhydrase 1	1424236	1429081	Phvul.004G013500.1
4	DegP protease 1	1432694	1438886	Phvul.004G013600.1
4	cyclophilin 38	1741245	1745433	Phvul.004G017000.1
4	Heavy metal transport/detoxification superfamily protein	2039571	2042693	Phvul.004G019800.1
4	Matrixin family protein	2179227	2180360	Phvul.004G021000.1
4	Unknown	3489224	3492308	Phvul.004G031300.1
4	biotin carboxyl carrier protein 2	3851284	3855655	Phvul.004G035000.2
4	HIS triad family protein 3	6786285	6790366	Phvul.004G053100.1
4	Ribulose bisphosphate carboxylase (small chain) family protein	9077625	9078545	Phvul.004G064800.1
4	photosystem I light harvesting complex gene 1	10829505	10831725	Phvul.004G071500.1
4	translocase of outer membrane 2Unknown kDa subunit 3	11271167	11275101	Phvul.004G072400.1
4	GTP binding Elongation factor Tu family protein	12411262	12414516	Phvul.004G075100.1
4	plastid ribosomal protein l11	21846861	21848808	Phvul.004G090600.1
4	chlorophyll A/B binding protein 1	24039458	24040673	Phvul.004G091600.1
4	chitinase A	29924393	29926225	Phvul.004G101500.1
4	phosphatase-related	33265519	33270889	Phvul.004G104600.1
4	Calcium-dependent lipid-binding (CaLB domain) family protein	36495283	36496616	Phvul.004G110400.1
4	Ribosomal protein L6 family	37993046	37996303	Phvul.004G116200.1
4	Remorin family protein	38072511	38075753	Phvul.004G116700.1
4	2 iron, 2 sulfur cluster binding	40107113	40108733	Phvul.004G125800.1
4	light harvesting complex of photosystem II 5	40404463	40406992	Phvul.004G128200.1
4	Kunitz family trypsin and protease inhibitor protein	41642966	41643878	Phvul.004G137600.1
4	Translation initiation factor eIF3 subunit	41971064	41974840	Phvul.004G141100.1
4	pyrimidine 1	42854319	42858749	Phvul.004G148000.1
4	thioredoxin-dependent peroxidase 1	44752664	44754677	Phvul.004G166100.1
4	elongation factor Ts family protein	44978742	44983901	Phvul.004G168100.1
4	NADP-malic enzyme 4	45247795	45253147	Phvul.004G170800.1
4	Unknown	45311996	45314898	Phvul.004G172100.1
4	HAD superfamily, subfamily IIIB acid phosphatase	45469502	45473151	Phvul.004G174200.1
5	photosystem I subunit G	303155	304019	Phvul.005G004000.1
5	Uncharacterised BCR, YbaB family COGUnknown718	447971	451268	Phvul.005G005700.1
5	ankyrin repeat-containing 2B	515819	521852	Phvul.005G006400.1
5	Ribosomal L5P family protein	977026	979084	Phvul.005G011400.1
5	proline-rich family protein	1592874	1595495	Phvul.005G018300.1
5	Ribosomal protein S19e family protein	1614344	1616006	Phvul.005G018600.1
5	Mog1/PsbP/DUF1795-like photosystem II reaction center PsbP family protein	1742337	1744403	Phvul.005G020200.1
5	Protein of unknown function, DUF642	2190448	2192811	Phvul.005G024100.1
5	RNA-binding (RRM/RBD/RNP motifs) family protein	3766136	3769277	Phvul.005G039000.1
5	Phosphoglycerate kinase family protein	6076203	6080368	Phvul.005G050700.1
5	phosphoglycerate kinase	6090451	6093999	Phvul.005G050800.1
5	TCP-1/cpn6Unknown chaperonin family protein	6632634	6637073	Phvul.005G051700.1
5	Aldolase-type TIM barrel family protein	6647720	6652553	Phvul.005G051800.1
5	cAMP-regulated phosphoprotein 19-related protein	7148845	7152902	Phvul.005G054800.1
5	photosystem II subunit R	7207937	7209787	Phvul.005G055200.1
5	Ribosomal protein S5/Elongation factor G/III/V family protein	7755781	7759975	Phvul.005G058100.1
5	proteasome subunit PAB1	8115957	8122216	Phvul.005G059300.1
5	related to ubiquitin 1	8290842	8296093	Phvul.005G060100.1
5	glyoxalase II 3	8930802	8934597	Phvul.005G062700.1
5	D-mannose binding lectin protein with Apple-like carbohydrate-binding domain	10010997	10012331	Phvul.005G066000.1
5	thioredoxin M-type 4	11800621	11803897	Phvul.005G071200.1
5	early nodulin-like protein 1	12648450	12650220	Phvul.005G073200.1
5	gamma-glutamyl hydrolase 1	18558582	18562986	Phvul.005G080600.1
5	protochlorophyllide oxidoreductase A	20215832	20218578	Phvul.005G083700.1
5	light-harvesting chlorophyll B-binding protein 3	22276246	22277992	Phvul.005G085800.1
5	ketol-acid reductoisomerase	28628188	28632208	Phvul.005G095900.1
5	FASCICLIN-like arabinoogalactan 9	29982130	29983171	Phvul.005G099500.1
5	6UnknownS acidic ribosomal protein family	31137176	31138209	Phvul.005G104700.1
5	photosystem II family protein	31292793	31293586	Phvul.005G105900.1
5	ribosomal protein 5B	31507389	31509778	Phvul.005G107000.1
5	photosynthetic electron transfer C	31917005	31920075	Phvul.005G109400.1
5	6UnknownS acidic ribosomal protein family	35004793	35006526	Phvul.005G126000.1
5	PDI-like 1-4	36348047	36352489	Phvul.005G135600.1
5	triosephosphate isomerase	37269323	37272590	Phvul.005G144100.1
5	Leucine-rich repeat (LRR) family protein	37670435	37672198	Phvul.005G149200.1
5	pfkB-like carbohydrate kinase family protein	38015411	38018680	Phvul.005G153300.1
5	homolog of carrot EP3-3 chitinase	38198741	38200321	Phvul.005G155800.1
5	NDH-dependent cyclic electron flow 1	39398188	39400706	Phvul.005G170200.1
5	Embryo-specific protein 3, (ATS3)	40002028	40003509	Phvul.005G177100.1
5	isopropylmalate dehydrogenase 2	40308424	40312332	Phvul.005G181600.1
5	uridylyltransferase-related	40315095	40317708	Phvul.005G181700.1
6	translocase of the inner mitochondrial membrane 13	2739677	2740902	Phvul.006G006100.1
6	cystatin B	9202165	9204828	Phvul.006G018600.1
6	NAD(P)-linked oxidoreductase superfamily protein	12083281	12088458	Phvul.006G028400.1
6	alanine:glyoxylate aminotransferase	12388878	12393560	Phvul.006G029100.1
6	Ankyrin repeat family protein	14843654	14846550	Phvul.006G038600.1
6	endoribonuclease L-PSP family protein	15666930	15670217	Phvul.006G043400.1
6	Unknown	16104702	16105783	Phvul.006G047400.1
6	small ubiquitin-like modifier 2	16114456	16116448	Phvul.006G047600.1
6	SHV3-like 2	16507864	16522922	Phvul.006G050400.1
6	Ribosomal protein S1Unknownp/S2Unknowne family protein	17136948	17138975	Phvul.006G055300.1
6	FASCICLIN-like arabinogalactan 1	17424637	17426188	Phvul.006G057400.1
6	Unknown	18345864	18346507	Phvul.006G065100.1
6	cyclophilin 5	18666010	18668788	Phvul.006G068200.1
6		19175068	19182739	Phvul.006G072200.1
6	Thioredoxin superfamily protein	19225058	19227130	Phvul.006G072600.1
6	Unknown	19244842	19249199	Phvul.006G072900.1
6	Unknown	20138785	20140934	Phvul.006G082200.1
6	hydroxyproline-rich glycoprotein family protein	20224280	20233141	Phvul.006G083300.1
6	Ribosomal protein S11 family protein	21327851	21329909	Phvul.006G095400.1
6	copper/zinc superoxide dismutase 1	21457667	21460879	Phvul.006G097000.1
6	O-acetylserine (thiol) lyase (OAS-TL) isoform A1	21678799	21682842	Phvul.006G099100.1
6	Ribose 5-phosphate isomerase, type A protein	21787747	21789084	Phvul.006G100600.1
6	GDP-D-mannose 3\',5\'-epimerase	21857644	21860599	Phvul.006G101600.1
6	pathogenesis-related 4	21898967	21901131	Phvul.006G102200.1
6	pathogenesis-related 4	21904738	21905775	Phvul.006G102300.1
6	Li-tolerant lipase 1	22384822	22390556	Phvul.006G107100.1
6	GDSL-like Lipase/Acylhydrolase superfamily protein	22405590	22408863	Phvul.006G107300.1
6	non-photochemical quenching 1	22488320	22492102	Phvul.006G108200.1
6	ribosomal protein S1	23683623	23687986	Phvul.006G121100.1
6	tubulin beta 8	24081355	24083997	Phvul.006G126100.1
6	peroxidase 2	24415433	24417689	Phvul.006G129600.1
6	Peroxidase superfamily protein	24427916	24430680	Phvul.006G129700.1
6	actin depolymerizing factor 3	24764775	24766701	Phvul.006G132700.1
6	Inositol monophosphatase family protein	25644406	25651749	Phvul.006G142400.1
6	Unknown	25694151	25696124	Phvul.006G142900.1
6	fibrillin	25880470	25882486	Phvul.006G145100.1
6	ATPase, F1 complex, gamma subunit protein	26305099	26307521	Phvul.006G149700.1
6	peroxiredoxin IIF	26490823	26493693	Phvul.006G151800.1
6	dehydratase family	26575492	26581210	Phvul.006G152700.1
6	glutamine synthetase 2	26862852	26869184	Phvul.006G155800.1
6	Unknown	27113545	27117175	Phvul.006G159000.1
6	Ribosomal protein L18ae/LX family protein	27440319	27442546	Phvul.006G163400.1
6	GDSL-like Lipase/Acylhydrolase superfamily protein	28020689	28023850	Phvul.006G169000.1
6	GDSL-like Lipase/Acylhydrolase superfamily protein	28030046	28032967	Phvul.006G169100.1
6	GDSL-like Lipase/Acylhydrolase superfamily protein	28060970	28063048	Phvul.006G169400.1
6	Aldolase-type TIM barrel family protein	28198235	28200096	Phvul.006G171100.1
6	Cysteine proteinases superfamily protein	28712556	28713947	Phvul.006G176800.1
6	P-loop containing nucleoside triphosphate hydrolases superfamily protein	28862014	28864597	Phvul.006G178400.1
6	Ribosomal protein S6e	29334241	29337322	Phvul.006G184300.1
6	allantoinase	29531578	29537276	Phvul.006G186800.1
6	Ribonuclease E inhibitor RraA/Dimethylmenaquinone methyltransferase	30222266	30223882	Phvul.006G196200.1
6	CAP (Cysteine-rich secretory proteins, Antigen 5, and Pathogenesis-related 1 protein) superfamily protein	30272550	30273214	Phvul.006G197200.1
6	pyrophosphorylase 6	30367396	30370474	Phvul.006G198500.1
6	methionine sulfoxide reductase B 2	30379059	30382367	Phvul.006G198700.1
6	UDP-glucosyl transferase 78D2	30546387	30548054	Phvul.006G201100.1
6	light harvesting complex photosystem II subunit 6	30973496	30975767	Phvul.006G207300.1
6	Bifunctional inhibitor/lipid-transfer protein/seed storage 2S albumin superfamily protein	30982889	30984777	Phvul.006G207500.1
6	beta-D-xylosidase 4	31049426	31054049	Phvul.006G208200.1
6	Ubiquinol-cytochrome C reductase hinge protein	31108883	31112006	Phvul.006G209400.1
6	Plastid-lipid associated protein PAP / fibrillin family protein	31473807	31478029	Phvul.006G214200.1
6	2Fe-2S ferredoxin-like superfamily protein	31669762	31671028	Phvul.006G216700.1
6	2Fe-2S ferredoxin-like superfamily protein	31673761	31674578	Phvul.006G216800.1
6	chloroplast heat shock protein 7Unknown-2	31824394	31827536	Phvul.006G219500.1
6	chloroplast heat shock protein 7Unknown-2	31833892	31837177	Phvul.006G219600.1
6	RAB GTPase 11C	31870253	31871444	Phvul.006G220200.1
7	cyclophilin 2Unknown-2	60281	63181	Phvul.007G001100.1
7	Hyaluronan / mRNA binding family	226106	229718	Phvul.007G003500.1
7	DnaJ/Hsp4Unknown cysteine-rich domain superfamily protein	453224	456086	Phvul.007G006200.1
7	Transketolase	472468	476956	Phvul.007G006600.1
7	dehydroascorbate reductase 2	686866	690124	Phvul.007G009800.1
7	thioredoxin X	1041685	1043675	Phvul.007G015500.1
7	NADH-ubiquinone oxidoreductase B18 subunit, putative	1345669	1348960	Phvul.007G019800.1
7	2UnknownS proteasome alpha subunit E2	1465263	1470676	Phvul.007G021000.1
7	2-oxoacid dehydrogenases acyltransferase family protein	1912289	1916874	Phvul.007G026300.1
7	Rad23 UV excision repair protein family	1918305	1922127	Phvul.007G026400.1
7	ATP synthase alpha/beta family protein	2798270	2802240	Phvul.007G034800.1
7	FAD/NAD(P)-binding oxidoreductase	2816879	2821171	Phvul.007G035000.1
7	PTEN 2	3059897	3067899	Phvul.007G038300.1
7	Plant basic secretory protein (BSP) family protein	3292652	3293735	Phvul.007G040900.1
7	Plant basic secretory protein (BSP) family protein	3296565	3297257	Phvul.007G041000.1
7	thiazole biosynthetic enzyme, chloroplast (ARA6) (THI1) (THI4)	4252089	4253791	Phvul.007G052900.1
7	photosystem I subunit D-2	4592393	4593316	Phvul.007G055900.1
7	Ribosomal protein S3Ae	5246358	5248794	Phvul.007G060700.1
7	phosphoglucomutase	5735275	5747543	Phvul.007G064900.1
7	membrane steroid binding protein 1	6202420	6204774	Phvul.007G068900.1
7	Concanavalin A-like lectin protein kinase family protein	6334760	6335915	Phvul.007G070300.1
7	Bacterial sec-independent translocation protein mttA/Hcf1Unknown6	6672803	6678428	Phvul.007G073200.1
7	Unknown	7715980	7717710	Phvul.007G080400.1
7	Ribosomal protein S13/S18 family	7726195	7727961	Phvul.007G080500.1
7	thioredoxin Y1	7732340	7735103	Phvul.007G080600.1
7	ribosomal protein 1	8033419	8036591	Phvul.007G081800.1
7	Peroxidase superfamily protein	8152270	8154568	Phvul.007G082600.1
7	Peroxidase superfamily protein	8157405	8160030	Phvul.007G082700.1
7	RAB GTPase homolog G3A	8456362	8462635	Phvul.007G085200.1
7	Ribosomal protein L21	9064905	9068201	Phvul.007G089400.1
7	Unknown	9333471	9336501	Phvul.007G091500.1
7	ATP synthase D chain, mitochondrial	9399703	9402674	Phvul.007G092100.1
7	Unknown	12208730	12211176	Phvul.007G105600.1
7	heat shock factor binding protein	12567501	12569983	Phvul.007G106500.1
7	RmlC-like cupins superfamily protein	15014365	15015350	Phvul.007G113400.1
7	Plastid-lipid associated protein PAP / fibrillin family protein	23586318	23589156	Phvul.007G124100.1
7	RNA-binding (RRM/RBD/RNP motifs) family protein	31138411	31141819	Phvul.007G130600.1
7	lactate/malate dehydrogenase family protein	34681881	34687628	Phvul.007G140600.1
7	ATPase, AAA-type, CDC48 protein	36797748	36802083	Phvul.007G149400.1
7	adenosine kinase 2	36947919	36952701	Phvul.007G150300.1
7	RNA-binding (RRM/RBD/RNP motifs) family protein	37158885	37161507	Phvul.007G150700.1
7	photosystem II reaction center PSB28 protein	37644643	37646399	Phvul.007G153500.1
7	Glutaredoxin family protein	37935326	37939064	Phvul.007G155300.1
7	photosystem I subunit E-2	37947212	37948819	Phvul.007G155500.1
7	Ribosomal protein L4/L1 family	39229824	39232224	Phvul.007G162900.1
7	Unknown	39328154	39329318	Phvul.007G163900.1
7	chloroplast stem-loop binding protein of 41 kDa	40505506	40507842	Phvul.007G172100.1
7	ribosome recycling factor, chloroplast precursor	40537459	40541583	Phvul.007G172400.1
7	glutathione reductase	41326980	41332566	Phvul.007G177200.1
7	RNA-binding KH domain-containing protein	41495419	41504913	Phvul.007G178400.1
7	seryl-tRNA synthetase / serine--tRNA ligase	41724792	41729652	Phvul.007G180500.1
7	ATP citrate lyase (ACL) family protein	42714036	42719343	Phvul.007G190800.1
7	Rho termination factor	42980734	42985387	Phvul.007G192400.1
7	regulatory particle triple-A ATPase 5A	43694423	43697877	Phvul.007G197100.1
7	calreticulin 1a	44012997	44016352	Phvul.007G200800.1
7	neurofilament protein-related	44495721	44502194	Phvul.007G206100.1
7	nuclear encoded CLP protease 5	45259902	45263773	Phvul.007G213700.1
7	CP12 domain-containing protein 2	45319074	45319780	Phvul.007G214200.1
7	thioredoxin family protein	45486045	45490891	Phvul.007G215900.1
7	thylakoid lumen 15.Unknown kDa protein	45927968	45930238	Phvul.007G219800.1
7	vacuolar membrane ATPase 1Unknown	45978705	45981465	Phvul.007G220600.1
7	FKBP-like peptidyl-prolyl cis-trans isomerase family protein	46535441	46539231	Phvul.007G225600.1
7	6UnknownS acidic ribosomal protein family	47026817	47028588	Phvul.007G230200.1
7	monodehydroascorbate reductase 1	47033127	47036968	Phvul.007G230300.1
7	RNA-binding (RRM/RBD/RNP motifs) family protein	47123651	47126499	Phvul.007G231600.1
7	isopropyl malate isomerase large subunit 1	47185070	47194601	Phvul.007G232000.1
7	Single hybrid motif superfamily protein	47342123	47344406	Phvul.007G233300.1
7	Transcriptional coactivator/pterin dehydratase	48043614	48047140	Phvul.007G240500.1
7	Proteinase inhibitor, propeptide	48535709	48538176	Phvul.007G245700.1
7	ubiquitin E2 variant 1D-4	50842155	50844938	Phvul.007G270100.1
7	Lactate/malate dehydrogenase family protein	51168173	51171730	Phvul.007G273500.1
7	Unknown	51377117	51377797	Phvul.007G276300.1
7	BolA-like family protein	51736013	51739450	Phvul.007G281100.1
8	Transketolase family protein	173472	178705	Phvul.008G000800.1
8	Aldolase-type TIM barrel family protein	417477	421202	Phvul.008G003600.1
8	general regulatory factor 3	482680	485463	Phvul.008G004300.1
8	Bifunctional inhibitor/lipid-transfer protein/seed storage 2S albumin superfamily protein	821596	822456	Phvul.008G008200.1
8	FKBP-like peptidyl-prolyl cis-trans isomerase family protein	914923	918965	Phvul.008G009400.1
8	actin-11	1035537	1039158	Phvul.008G011000.1
8	heat shock cognate protein 7Unknown-1	1145634	1148629	Phvul.008G013000.1
8	PsbP-like protein 1	1315580	1318022	Phvul.008G015100.1
8	beta-hexosaminidase 1	1341005	1349089	Phvul.008G015400.1
8	allene oxide cyclase 4	1744094	1746123	Phvul.008G020200.1
8	voltage dependent anion channel 1	3775439	3779229	Phvul.008G043800.1
8	Hyaluronan / mRNA binding family	4165203	4170250	Phvul.008G047300.1
8	ATPase, V1 complex, subunit B protein	4370303	4376237	Phvul.008G050000.1
8	2-phosphoglycolate phosphatase 1	4567320	4572129	Phvul.008G051700.1
8	mitochondrial acyl carrier protein 2	4642461	4644215	Phvul.008G052400.1
8	chloroplastic acetylcoenzyme A carboxylase 1	4711406	4716239	Phvul.008G053000.1
8	thioredoxin F2	4735189	4737902	Phvul.008G053300.1
8	CAX interacting protein 1	4997444	5000087	Phvul.008G055800.1
8	Ribosomal L5P family protein	5299135	5302404	Phvul.008G059200.1
8	phosphomannomutase	6150477	6154720	Phvul.008G068100.1
8	FASCICLIN-like arabinogalactan-protein 1Unknown	7089575	7091036	Phvul.008G075000.1
8	Phosphoglycerate mutase, 2,3-bisphosphoglycerate-independent	7483801	7488363	Phvul.008G077900.1
8	elongation factor P (EF-P) family protein	7988247	7991972	Phvul.008G082900.1
8	lipid transfer protein 4	8658472	8659588	Phvul.008G087000.1
8	Tautomerase/MIF superfamily protein	9452245	9454602	Phvul.008G092500.1
8	plastid transcriptionally active 4	10613201	10620520	Phvul.008G099200.1
8	high cyclic electron flow 1	13190883	13194247	Phvul.008G112000.1
8	Mitochondrial glycoprotein family protein	14047104	14050101	Phvul.008G115200.1
8	Unknown	14969447	14976005	Phvul.008G118700.1
8	NAD(P)-binding Rossmann-fold superfamily protein	15179872	15190428	Phvul.008G119600.1
8	photosystem I subunit E-2	21021960	21023466	Phvul.008G133700.1
8	Lactoylglutathione lyase / glyoxalase I family protein	22038306	22039653	Phvul.008G136900.1
8	Oxidoreductase, zinc-binding dehydrogenase family protein	32272140	32275241	Phvul.008G151800.1
8	Glutaredoxin family protein	38866287	38868658	Phvul.008G156300.1
8	general regulatory factor 2	41741118	41743699	Phvul.008G162500.1
8	cytochrome C oxidase 6B	46534413	46538434	Phvul.008G176600.1
8	ascorbate peroxidase 4	46543820	46548859	Phvul.008G176700.1
8	Metallo-hydrolase/oxidoreductase superfamily protein	49047998	49051635	Phvul.008G187100.1
8	Aldolase superfamily protein	49345243	49347808	Phvul.008G189200.1
8	rubisco activase	49874653	49878008	Phvul.008G192400.1
8	photosystem II subunit P-1	50426625	50428970	Phvul.008G196500.1
8	Unknown	51333557	51336879	Phvul.008G203100.1
8	Glutathione S-transferase, C-terminal-like;Translation elongation factor EF1B/ribosomal protein S6	51569717	51572840	Phvul.008G204800.1
8	ethylene-forming enzyme	52589492	52591465	Phvul.008G214200.1
8	Unknown	52924094	52925476	Phvul.008G216800.1
8	Ribosomal protein S4 (RPS4A) family protein	53350978	53353225	Phvul.008G221000.1
8	Subtilase family protein	54221720	54227293	Phvul.008G228700.1
8	Subtilisin-like serine endopeptidase family protein	54401464	54407431	Phvul.008G229400.1
8	Subtilisin-like serine endopeptidase family protein	54420566	54425630	Phvul.008G229500.1
8	high mobility group A	55006028	55007366	Phvul.008G236000.1
8	UDP-glucose pyrophosphorylase 2	55496379	55503818	Phvul.008G240600.1
8	eukaryotic translation initiation factor 2 beta subunit	56097194	56101841	Phvul.008G246100.1
8	Ribosomal protein L3Unknown/L7 family protein	56855590	56857591	Phvul.008G255000.1
8	chloroplastic lipocalin	57683648	57686472	Phvul.008G265400.1
8	peptide met sulfoxide reductase 4	57806923	57810485	Phvul.008G267100.1
8	Ribosomal protein L7Ae/L3Unknowne/S12e/Gadd45 family protein	57948895	57951436	Phvul.008G269000.1
8	Dihydrolipoamide succinyltransferase	57963811	57970314	Phvul.008G269300.1
8	tubulin folding cofactor A (KIESEL)	58375652	58377569	Phvul.008G274500.1
8	HEAT SHOCK PROTEIN 81.4	58757169	58760582	Phvul.008G281400.1
8	Aldolase superfamily protein	58811684	58814232	Phvul.008G282000.1
8	ADP glucose pyrophosphorylase 1	58940285	58943733	Phvul.008G284000.1
8	photosystem II light harvesting complex gene 2.1	59037982	59039588	Phvul.008G285100.1
8	FASCICLIN-like arabinogalactan 2	59259350	59261107	Phvul.008G288800.1
8	photosystem I light harvesting complex gene 3	59318664	59320347	Phvul.008G289700.1
8	Coproporphyrinogen III oxidase	59327355	59330911	Phvul.008G289900.1
9	LYR family of Fe/S cluster biogenesis protein	561659	564352	Phvul.009G002900.1
9	cold-regulated 47	852166	853621	Phvul.009G004400.1
9	glyceraldehyde-3-phosphate dehydrogenase B subunit	1136229	1139788	Phvul.009G006600.1
9	Unknown	1140418	1143549	Phvul.009G006700.1
9	catalase 2	1799040	1803479	Phvul.009G011100.1
9	Subtilisin-like serine endopeptidase family protein	3387901	3392119	Phvul.009G018600.1
9	plastocyanin 1	3848908	3850084	Phvul.009G020300.1
9	cold, circadian rhythm, and rna binding 2	5456947	5458052	Phvul.009G023700.1
9	glycine-rich protein 2B	5829146	5830355	Phvul.009G025100.1
9	RNA-binding (RRM/RBD/RNP motifs) family protein	7284598	7286848	Phvul.009G033600.1
9	nascent polypeptide-associated complex subunit alpha-like protein 2	7934549	7936274	Phvul.009G038400.1
9	Ribosomal protein L6 family	8054778	8056202	Phvul.009G039400.1
9	Unknown	8410126	8412867	Phvul.009G043000.1
9	3UnknownS ribosomal protein, putative	8727257	8729478	Phvul.009G045100.1
9	6UnknownS acidic ribosomal protein family	8771939	8773323	Phvul.009G045800.1
9	Tetratricopeptide repeat (TPR)-like superfamily protein	9534139	9536699	Phvul.009G050400.1
9	NmrA-like negative transcriptional regulator family protein	10600501	10602389	Phvul.009G059000.1
9	ornithine carbamoyltransferase	10631302	10634439	Phvul.009G059600.1
9	WPP domain protein 2	11683184	11684228	Phvul.009G068700.1
9	adenine phosphoribosyl transferase 1	11858875	11865298	Phvul.009G070900.1
9	KH domain-containing protein	12564123	12569447	Phvul.009G076600.1
9	KH domain-containing protein	12581006	12586512	Phvul.009G076800.1
9	Unknown	13104502	13107364	Phvul.009G082000.1
9	ATPase, FUnknown complex, subunit B/B\', bacterial/chloroplast	14293164	14296424	Phvul.009G092400.1
9	RAN GTPase 3	14718390	14721094	Phvul.009G095400.1
9	N-terminal nucleophile aminohydrolases (Ntn hydrolases) superfamily protein	15630602	15634944	Phvul.009G103400.1
9	basic chitinase	17449427	17450654	Phvul.009G116600.1
9	basic chitinase	17485614	17486785	Phvul.009G116700.1
9	Ribosomal protein L3 family protein	17560293	17561777	Phvul.009G117700.1
9	glutamate-1-semialdehyde 2,1-aminomutase 2	17624511	17626765	Phvul.009G118500.1
9	thylakoidal ascorbate peroxidase	18708407	18715314	Phvul.009G126500.1
9	PDI-like 1-2	18775225	18779372	Phvul.009G126800.1
9	Aldolase superfamily protein	18799272	18812598	Phvul.009G127100.1
9	DPP6 N-terminal domain-like protein	18958821	18961584	Phvul.009G128300.1
9	thioredoxin M-type 4	19711888	19713595	Phvul.009G133900.1
9	Mog1/PsbP/DUF1795-like photosystem II reaction center PsbP family protein	19814511	19816855	Phvul.009G134500.1
9	manganese superoxide dismutase 1	20754551	20759021	Phvul.009G141600.1
9	Eukaryotic aspartyl protease family protein	21031439	21033715	Phvul.009G144100.1
9	ribulose-bisphosphate carboxylases	21101710	21103486	Phvul.009G144500.1
9	CLPC homologue 1	23588291	23596068	Phvul.009G162100.1
9	glyceraldehyde-3-phosphate dehydrogenase C2	24580917	24583761	Phvul.009G168400.1
9	Haloacid dehalogenase-like hydrolase (HAD) superfamily protein	24816018	24821250	Phvul.009G169900.1
9	31-kDa RNA binding protein	25016188	25018700	Phvul.009G171500.1
9	polygalacturonase inhibiting protein 1	26512436	26521909	Phvul.009G180400.1
9	eukaryotic elongation factor 5A-1	27211707	27214154	Phvul.009G184600.1
9	plasmodesmata callose-binding protein 3	28409019	28417639	Phvul.009G192000.1
9	Cytosol aminopeptidase family protein	28882053	28890803	Phvul.009G195000.1
9	Tetratricopeptide repeat (TPR)-like superfamily protein	28956505	28975234	Phvul.009G195600.1
9	Co-chaperone GrpE family protein	29103454	29107074	Phvul.009G196500.1
9	adenylate kinase family protein	30902795	30915191	Phvul.009G208900.1
9	photosystem I subunit K	31992801	31994316	Phvul.009G216400.1
9	chaperonin 2Unknown	33289361	33292345	Phvul.009G224900.1
9	aleurain-like protease	33603270	33606712	Phvul.009G227100.1
9	germin 3	33650737	33651892	Phvul.009G227800.1
9	Stress responsive alpha-beta barrel domain protein	33745882	33746985	Phvul.009G228300.1
9	Transducin family protein / WD-4Unknown repeat family protein	34280433	34286884	Phvul.009G232200.1
9	HISTIDINE TRIAD NUCLEOTIDE-BINDING 2	35331618	35334740	Phvul.009G240300.1
9	plasma-membrane associated cation-binding protein 1	35926257	35927749	Phvul.009G245700.1
9	translationally controlled tumor protein	36176443	36178407	Phvul.009G248700.1
9	MLP-like protein 423	36547187	36548248	Phvul.009G252400.1
9	MLP-like protein 423	36578547	36579550	Phvul.009G253000.1
9	lipoamide dehydrogenase 1	36774799	36783261	Phvul.009G254900.1
9	Glycosyl hydrolase superfamily protein	36945592	36948126	Phvul.009G256400.1
9	photosystem I P subunit	37075538	37077634	Phvul.009G258500.1
10	light harvesting complex photosystem II	550578	552238	Phvul.010G002100.1
10	NAD(P)-binding Rossmann-fold superfamily protein	1736716	1739743	Phvul.010G011300.1
10	Unknown	2262907	2269486	Phvul.010G014200.1
10	uracil phosphoribosyltransferase	2458351	2464561	Phvul.010G015300.1
10	NAD(P)-linked oxidoreductase superfamily protein	2701559	2704274	Phvul.010G017100.1
10	FK5Unknown6- and rapamycin-binding protein 15 kD-2	3571899	3575512	Phvul.010G024400.1
10	Ribosomal protein S8e family protein	3593720	3596179	Phvul.010G024600.1
10	ATP synthase epsilon chain	4603684	4603941	Phvul.010G031400.1
10	P-loop containing nucleoside triphosphate hydrolases superfamily protein	6062628	6067816	Phvul.010G040800.1
10	GroES-like family protein	6274189	6277504	Phvul.010G041700.1
10	ATPase, F1 complex, delta/epsilon subunit	6464311	6467074	Phvul.010G042900.1
10	Nucleoside diphosphate kinase family protein	6884394	6886415	Phvul.010G045400.1
10	Acyl transferase/acyl hydrolase/lysophospholipase superfamily protein	7215459	7224703	Phvul.010G047000.1
10	ribosomal protein L4	7495886	7499343	Phvul.010G048100.1
10	Hyaluronan / mRNA binding family	7781808	7784979	Phvul.010G049300.1
10	photosystem II subunit Q-2	8294380	8297353	Phvul.010G052300.1
10	lipid transfer protein 1	15073965	15075561	Phvul.010G066400.1
10	lipid transfer protein 3	17454685	17456340	Phvul.010G069100.1
10	lipid transfer protein 6	18068449	18069557	Phvul.010G069500.1
10	ribosomal protein S13A	30909907	30912143	Phvul.010G082900.1
10	Calcium-dependent lipid-binding (CaLB domain) family protein	34558766	34561242	Phvul.010G093800.1
10	Unknown	34568969	34569981	Phvul.010G094000.1
10	Unknown	35010255	35010998	Phvul.010G096700.1
10	glyoxylate reductase 1	37024624	37029439	Phvul.010G109500.1
10	thylakoid rhodanese-like	37629437	37634758	Phvul.010G112100.1
10	ribosomal protein L5 B	38551735	38554116	Phvul.010G117700.1
10	photosystem I P subunit	38928453	38930881	Phvul.010G120100.1
10	purple acid phosphatase 29	39164556	39168010	Phvul.010G121500.1
10	4Unknowns ribosomal protein SA B	39523517	39525617	Phvul.010G125100.1
10	Subtilase family protein	39826290	39829267	Phvul.010G128600.1
10	germin 3	39963544	39964391	Phvul.010G129600.1
10	germin-like protein 1	39982780	39983851	Phvul.010G129900.1
10	GDSL-like Lipase/Acylhydrolase superfamily protein	41526634	41528995	Phvul.010G143600.1
10	HAD superfamily, subfamily IIIB acid phosphatase	41578656	41580230	Phvul.010G144300.1
10	Isochorismatase family protein	41866026	41870824	Phvul.010G147700.1
10	photosystem I subunit H2	41942976	41944827	Phvul.010G148800.1
10	Rubredoxin-like superfamily protein	42289697	42296155	Phvul.010G153300.1
10	Aconitase/3-isopropylmalate dehydratase protein	42329339	42331727	Phvul.010G153800.1
10	methyl-CPG-binding domain 1Unknown	42448122	42451645	Phvul.010G155700.1
10	post-illumination chlorophyll fluorescence increase	42484795	42488052	Phvul.010G156300.1
10	Ribosomal protein L7Ae/L3Unknowne/S12e/Gadd45 family protein	42872468	42874369	Phvul.010G160500.1
11	Photosystem II 5 kD protein	725790	726110	Phvul.011G009700.1
11	Ribosomal protein L1p/L1Unknowne family	889927	895171	Phvul.011G011500.1
11	Unknown	2029699	2040065	Phvul.011G024500.1
11	chloroplast signal recognition particle component (CAO)	2112554	2114278	Phvul.011G025300.1
11	rotamase CYP 3	2197477	2199019	Phvul.011G026900.1
11	ribosomal protein L12-C	2235342	2236448	Phvul.011G027700.1
11	photosystem II stability/assembly factor, chloroplast (HCF136)	2524932	2529539	Phvul.011G029800.1
11	glycine-rich protein 2B	2932933	2934192	Phvul.011G033900.1
11	fructose-bisphosphate aldolase 2	3385903	3388808	Phvul.011G039100.1
11	basic transcription factor 3	3653645	3656462	Phvul.011G041900.1
11	cold, circadian rhythm, and rna binding 2	3880909	3882030	Phvul.011G045000.1
11	RAB GTPase homolog G3F	3956171	3959645	Phvul.011G046100.1
11	homolog of carrot EP3-3 chitinase	4385181	4386182	Phvul.011G051500.1
11	FKBP-like peptidyl-prolyl cis-trans isomerase family protein	4397720	4401407	Phvul.011G051700.1
11	lipoxygenase 2	4827791	4833840	Phvul.011G056500.1
11	RAB GTPase homolog A2B	5292708	5294877	Phvul.011G061100.1
11	plastid transcriptionally active 16	5347629	5350679	Phvul.011G061600.1
11	Tim1Unknown/DDP family zinc finger protein	5561960	5563483	Phvul.011G064100.1
11	heat shock protein 7Unknown	5660904	5663992	Phvul.011G065000.1
11	Histone superfamily protein	5769483	5770227	Phvul.011G066500.1
11	Ras-related small GTP-binding family protein	5785674	5789412	Phvul.011G066700.1
11	ribosomal protein L23AB	5856348	5858032	Phvul.011G067600.1
11	ascorbate peroxidase 1	6378762	6381275	Phvul.011G071300.1
11	Glycosyl hydrolase superfamily protein	7209220	7211149	Phvul.011G077900.1
11	Ribosomal protein L11 family protein	7366535	7367431	Phvul.011G079400.1
11	chaperonin-6Unknownalpha	7824133	7827743	Phvul.011G082600.1
11	lactoylglutathione lyase family protein / glyoxalase I family protein	8085178	8091934	Phvul.011G084400.1
11	copper/zinc superoxide dismutase 2	8317269	8322335	Phvul.011G086300.1
11	ribosomal protein L9	8351501	8354712	Phvul.011G086500.1
11	ribulose-bisphosphate carboxylases	8697794	8698081	Phvul.011G089000.1
11	protein tyrosine phosphatases;protein tyrosine phosphatases	9093041	9096535	Phvul.011G091000.1
11	MD-2-related lipid recognition domain-containing protein	10805528	10809833	Phvul.011G100100.1
11	beta-amylase 5	12853935	12856880	Phvul.011G107700.1
11	lumazine-binding family protein	15416195	15417439	Phvul.011G114100.1
11	ketol-acid reductoisomerase	30603878	30608428	Phvul.011G134200.1
11	Cyclophilin-like peptidyl-prolyl cis-trans isomerase family protein	38590690	38602461	Phvul.011G148100.1
11	thioredoxin M-type 4	41576456	41578571	Phvul.011G157700.1
11	Lactate/malate dehydrogenase family protein	41860148	41865029	Phvul.011G159000.1
11	chitinase A	43710467	43711598	Phvul.011G167300.1
11	kunitz trypsin inhibitor 1	44060115	44060986	Phvul.011G169800.1
11	Kunitz family trypsin and protease inhibitor protein	44066282	44066905	Phvul.011G169900.1
11	SOUL heme-binding family protein	44752110	44754256	Phvul.011G173900.1
11	Glycosyl hydrolase superfamily protein	45211742	45213138	Phvul.011G177000.1
11	metacaspase 5	45594182	45597318	Phvul.011G180300.1
11	Eukaryotic aspartyl protease family protein	48532211	48535691	Phvul.011G206100.1
11	RNA polymerase	48649292	48666715	Phvul.011G206900.1

## Sheet: Supplementary Table S3
Supplementary Table 3. Gene Ontology Terms for all Identified Proteins.
Protein	Transcript Name	Gene Ontology Terms
chloroplastic drought-induced stress protein of 32 kD	Phvul.001G002100.1	glycerol ether metabolic process,protein disulfide oxidoreductase activity,cell redox homeostasis
Chaperone protein htpG family protein	Phvul.001G005200.1	ATP binding,protein folding,response to stress,unfolded protein binding
DnaJ/Hsp4Unknown cysteine-rich domain superfamily protein	Phvul.001G007500.1	heat shock protein binding,unfolded protein binding
Translation elongation factor EF1B/ribosomal protein S6 family protein	Phvul.001G007700.1	translation elongation factor activity,eukaryotic translation elongation factor 1 complex,translational elongation
Papain family cysteine protease	Phvul.001G009900.1	proteolysis,cysteine-type peptidase activity
GYF domain-containing protein	Phvul.001G015100.3	protein binding
ribosomal protein S9	Phvul.001G017500.1	structural constituent of ribosome,ribosome, translation
phospholipase A 2A	Phvul.001G020100.1	lipid metabolic process
poly(A) binding protein 2	Phvul.001G023500.1	nucleotide binding,nucleic acid binding,RNA binding
Granulin repeat cysteine protease family protein	Phvul.001G024500.1	proteolysis
glycine decarboxylase P-protein 2	Phvul.001G035500.1	catalytic activity,glycine dehydrogenase (decarboxylating) activity,glycine metabolic process,glycine catabolic process,pyridoxal phosphate binding,oxidation-reduction process
glutathione peroxidase 1	Phvul.001G041100.1	glutathione peroxidase activity,response to oxidative stress,oxidation-reduction process
Tetratricopeptide repeat (TPR)-like superfamily protein	Phvul.001G081700.1	mitochondrial outer membrane translocase complex,protein import into mitochondrial outer membrane
Ribosomal protein S21 family protein	Phvul.001G094500.1	structural constituent of ribosome,intracellular,ribosome,translation
glyceraldehyde 3-phosphate dehydrogenase A subunit	Phvul.001G098100.1	glucose metabolic process,oxidoreductase activity, acting on the aldehyde or oxo group of donors, NAD or NADP as acceptor,NADP binding,NAD binding,oxidation-reduction process
calmodulin 5	Phvul.001G102700.1	calcium ion binding
Co-chaperone GrpE family protein	Phvul.001G108000.1	adenyl-nucleotide exchange factor activity,protein folding,protein homodimerization activity,chaperone binding
Cobalamin-independent synthase family protein	Phvul.001G113800.1	5-methyltetrahydropteroyltriglutamate-homocysteine S-methyltransferase activity,zinc ion binding,cellular amino acid biosynthetic process,methionine biosynthetic process
Nascent polypeptide-associated complex (NAC), alpha subunit family protein	Phvul.001G117000.1	protein binding
photosynthetic electron transfer A	Phvul.001G117600.1	iron ion binding,electron carrier activity,photosynthesis,heme binding,integral to thylakoid membrane
Mog1/PsbP/DUF1795-like photosystem II reaction center PsbP family protein	Phvul.001G119100.1	calcium ion binding,photosystem II,oxygen evolving complex,photosynthesis,extrinsic to membrane
chaperonin 1Unknown	Phvul.001G120500.1	cytoplasm,protein folding
glutamate synthase 1	Phvul.001G123900.1	catalytic activity,glutamate biosynthetic process,nitrogen compound metabolic process,metabolic process,glutamate synthase activity,oxidoreductase activity,oxidoreductase activity, acting on the CH-NH2 group of donors,oxidation-reduction process
beta-1,3-glucanase 1	Phvul.001G128500.1	hydrolase activity, hydrolyzing O-glycosyl compounds,carbohydrate metabolic process
Ribosomal protein S1Unknownp/S2Unknowne family protein	Phvul.001G139900.1	RNA binding,structural constituent of ribosome,intracellular,ribosome,translation,small ribosomal subunit
Ribosomal protein L14p/L23e family protein	Phvul.001G164200.1	structural constituent of ribosome,ribosome,translation
GroES-like zinc-binding dehydrogenase family protein	Phvul.001G167100.1	ethanol oxidation,zinc ion binding,oxidoreductase activity,S-(hydroxymethyl)glutathione dehydrogenase activity,oxidation-reduction process
histone H4	Phvul.001G169200.1	nucleosome,DNA binding,nucleus,nucleosome assembly,protein heterodimerization activity
Pyridoxal-dependent decarboxylase family protein	Phvul.001G177300.1	catalytic activity,diaminopimelate decarboxylase activity,lysine biosynthetic process via diaminopimelate
ribosomal protein L2	Phvul.001G180400.1	RNA binding,structural constituent of ribosome,intracellular,ribosome,translation,large ribosomal subunit,transferase activity
triosephosphate isomerase	Phvul.001G181000.1	catalytic activity,triose-phosphate isomerase activity,metabolic process
Thioredoxin superfamily protein	Phvul.001G186000.1	oxidoreductase activity
Enolase	Phvul.001G186100.1	phosphopyruvate hydratase complex,magnesium ion binding,phosphopyruvate hydratase activity,glycolysis
starch branching enzyme 2.2	Phvul.001G187600.1	catalytic activity,hydrolase activity, hydrolyzing O-glycosyl compounds,carbohydrate metabolic process,cation binding
6UnknownS acidic ribosomal protein family	Phvul.001G188200.1	structural constituent of ribosome,intracellular,ribosome,translational elongation
Tubulin/FtsZ family protein	Phvul.001G189700.1	GTPase activity,GTP binding,cytoplasm,GTP catabolic process,protein complex,protein polymerization
2-cysteine peroxiredoxin B	Phvul.001G194100.1	antioxidant activity,oxidoreductase activity,peroxiredoxin activity,oxidation-reduction process
chloroplast RNA-binding protein 33	Phvul.001G196700.1	nucleotide binding,nucleic acid binding
Nucleic acid-binding, OB-fold-like protein	Phvul.001G199400.1	structural constituent of ribosome,intracellular,ribosome,translation
Ribosomal protein L19e family protein	Phvul.001G210100.1	structural constituent of ribosome,intracellular,ribosome,translation
ADP-ribosylation factor A1F	Phvul.001G215400.1	GTP binding,intracellular,intracellular protein transport,small GTPase mediated signal transduction,protein transport
S-adenosylmethionine synthetase 1	Phvul.001G216700.1	methionine adenosyltransferase activity,ATP binding,S-adenosylmethionine biosynthetic process
rotamase CYP 4	Phvul.001G219400.1	peptidyl-prolyl cis-trans isomerase activity,protein folding
Cysteine proteinases superfamily protein	Phvul.001G220100.1	cysteine-type endopeptidase activity,proteolysis,cysteine-type peptidase activity,regulation of catalytic activity
chloroplast RNA binding	Phvul.001G223800.1	catalytic activity,cellular metabolic process,coenzyme binding
Photosystem II reaction center PsbP family protein	Phvul.001G224100.1	calcium ion binding,photosystem II,oxygen evolving complex,photosynthesis,extrinsic to membrane
haloacid dehalogenase-like hydrolase family protein	Phvul.001G224700.1	protein binding,oxidoreductase activity
dehydroascorbate reductase 1	Phvul.001G230400.1	protein binding
rubisco activase	Phvul.001G234300.1	ATP binding
subtilase 4.12	Phvul.001G238100.1	serine-type endopeptidase activity,proteolysis,identical protein binding,negative regulation of catalytic activity
sedoheptulose-bisphosphatase	Phvul.001G240200.1	carbohydrate metabolic process,fructose 1,6-bisphosphate 1-phosphatase activity,phosphoric ester hydrolase activity
Uroporphyrinogen decarboxylase	Phvul.001G248800.1	uroporphyrinogen decarboxylase activity,porphyrin-containing compound biosynthetic process
serine hydroxymethyltransferase 4	Phvul.001G266600.1	catalytic activity,glycine hydroxymethyltransferase activity,glycine metabolic process,L-serine metabolic process,pyridoxal phosphate binding
Single hybrid motif superfamily protein	Phvul.002G006000.1	glycine cleavage complex,glycine catabolic process,glycine decarboxylation via glycine cleavage system
tubulin alpha-2 chain	Phvul.002G007900.1	GTPase activity,structural constituent of cytoskeleton,GTP binding,microtubule,GTP catabolic process,microtubule-based process,protein complex,protein polymerization
Cystathionine beta-synthase (CBS) family protein	Phvul.002G016800.1	adenyl nucleotide binding
Thioredoxin superfamily protein	Phvul.002G023500.1	glycerol ether metabolic process,protein disulfide oxidoreductase activity,cell redox homeostasis
photosystem II subunit O-2	Phvul.002G024000.1	calcium ion binding,photosystem II,oxygen evolving complex,photosynthesis,extrinsic to membrane,photosystem II stabilization
hydroxymethylbilane synthase	Phvul.002G034500.1	hydroxymethylbilane synthase activity,peptidyl-pyrromethane cofactor linkage,tetrapyrrole biosynthetic process
rubredoxin family protein	Phvul.002G037500.1	protein binding
O-acetylserine (thiol) lyase (OAS-TL) isoform A1	Phvul.002G045200.1	cysteine synthase activity,cysteine biosynthetic process from serine
2Fe-2S ferredoxin-like superfamily protein	Phvul.002G045400.1	electron carrier activity,electron transport chain,iron-sulfur cluster binding,2 iron, 2 sulfur cluster binding
Ribosomal protein S7p/S5e family protein	Phvul.002G050300.1	RNA binding,structural constituent of ribosome,translation
Calcium-binding EF-hand family protein	Phvul.002G060300.1	calcium ion binding
stress-inducible protein, putative	Phvul.002G060800.1	protein binding
Transducin/WD4Unknown repeat-like superfamily protein	Phvul.002G070400.1	protein binding
carbonic anhydrase 2	Phvul.002G071200.1	carbonate dehydratase activity,zinc ion binding,carbon utilization
Ribosomal protein L1Unknown family protein	Phvul.002G074600.1	structural constituent of ribosome,intracellular,ribosome,translational elongation,ribosome biogenesis
pyruvate dehydrogenase complex E1 alpha subunit	Phvul.002G077600.1	pyruvate dehydrogenase (acetyl-transferring) activity,glycolysis,metabolic process,oxidoreductase activity, acting on the aldehyde or oxo group of donors, disulfide as acceptor,intracellular membrane-bounded organelle,oxidation-reduction process
Cyclophilin-like peptidyl-prolyl cis-trans isomerase family protein	Phvul.002G088300.1	peptidyl-prolyl cis-trans isomerase activity,protein folding
Leucine-rich repeat (LRR) family protein	Phvul.002G092200.1	protein binding
GroES-like family protein	Phvul.002G095400.1	cytoplasm,protein folding
Cytochrome c	Phvul.002G098700.1	iron ion binding,electron carrier activity,heme binding
ferredoxin-NADP(+)-oxidoreductase 2	Phvul.002G108000.1	oxidoreductase activity,oxidation-reduction process
acyl-CoA-binding protein 6	Phvul.002G127700.1	fatty-acyl-CoA binding
CLP protease P4	Phvul.002G128500.1	serine-type endopeptidase activity,proteolysis
phosphoribulokinase	Phvul.002G133100.1	ATP binding,carbohydrate metabolic process,metabolic process,phosphoribulokinase activity,kinase activity
Plastid-lipid associated protein PAP / fibrillin family protein	Phvul.002G137800.1	structural molecule activity,chloroplast
alanine-2-oxoglutarate aminotransferase 2	Phvul.002G150800.1	catalytic activity,biosynthetic process,pyridoxal phosphate binding
Double Clp-N motif protein	Phvul.002G151400.1	protein metabolic process
glutathione peroxidase 8	Phvul.002G157200.1	glutathione peroxidase activity,response to oxidative stress,oxidation-reduction process
Protein prenylyltransferase superfamily protein	Phvul.002G187000.1	protein binding
FK5Unknown6-binding protein 13	Phvul.002G187500.1	protein folding
lysm domain GPI-anchored protein 2 precursor	Phvul.002G188800.1	cell wall macromolecule catabolic process
FtsH extracellular protease family	Phvul.002G190900.1	nucleotide binding,metalloendopeptidase activity,ATP binding,proteolysis,zinc ion binding,membrane,integral to membrane,nucleoside-triphosphatase activity
chlorophyll A/B binding protein 1	Phvul.002G196400.1	photosynthesis, light harvesting,membrane
double-stranded DNA-binding family protein	Phvul.002G197500.1	DNA binding
polygalacturonase inhibiting protein 1	Phvul.002G201800.1	protein binding
light harvesting complex photosystem II subunit 6	Phvul.002G207500.1	photosynthesis, light harvesting,membrane
ortholog of human splicing factor SC35	Phvul.002G208600.1	nucleotide binding,nucleic acid binding
MLP-like protein 423	Phvul.002G209400.1	defense response,response to biotic stimulus
mitochondrial HSO7Unknown 2	Phvul.002G215800.1	ATP binding,protein folding,unfolded protein binding
peroxisomal NAD-malate dehydrogenase 2	Phvul.002G216800.1	catalytic activity,carbohydrate metabolic process,malate metabolic process,oxidoreductase activity,oxidoreductase activity, acting on the CH-OH group of donors, NAD or NADP as acceptor,L-malate dehydrogenase activity,oxidation-reduction process
Pyridoxal phosphate (PLP)-dependent transferases superfamily protein	Phvul.002G217100.1	catalytic activity,biosynthetic process,lysine biosynthetic process via diaminopimelate,L,L-diaminopimelate aminotransferase activity,pyridoxal phosphate binding
Quinone reductase family protein	Phvul.002G219700.1	FMN binding,oxidoreductase activity,negative regulation of transcription, DNA-dependent
Clathrin light chain protein	Phvul.002G227200.1	structural molecule activity,intracellular protein transport,vesicle-mediated transport,clathrin coat of trans-Golgi network vesicle,clathrin coat of coated pit
Ribosomal protein S5 family protein	Phvul.002G229700.1	RNA binding,structural constituent of ribosome,ribosome,translation,small ribosomal subunit
translocon at the outer envelope membrane of chloroplasts 159	Phvul.002G246700.1	GTP binding,hydrolase activity, acting on acid anhydrides
protein containing PDZ domain, a K-box domain, and a TPR region	Phvul.002G247200.1	protein binding
DNAJ heat shock family protein	Phvul.002G257300.1	ATP binding,protein folding,response to heat,heat shock protein binding,unfolded protein binding
FK5Unknown6-binding protein 16-2	Phvul.002G262400.1	protein folding
Histone superfamily protein	Phvul.002G269200.1	nucleosome,DNA binding,nucleosome assembly,protein heterodimerization activity
photosystem I reaction center subunit PSI-N, chloroplast, putative / PSI-N, putative (PSAN)	Phvul.002G269400.1	calmodulin binding,photosystem I,photosynthesis,thylakoid membrane
acyl carrier protein 4	Phvul.002G282800.1	fatty acid biosynthetic process,phosphopantetheine binding
Nucleic acid-binding, OB-fold-like protein	Phvul.002G287600.1	RNA binding
glutathione peroxidase 6	Phvul.002G288700.1	glutathione peroxidase activity,response to oxidative stress,oxidation-reduction process
Nucleoside diphosphate kinase family protein	Phvul.002G297900.1	nucleoside diphosphate kinase activity,ATP binding,nucleoside diphosphate phosphorylation,GTP biosynthetic process,UTP biosynthetic process,CTP biosynthetic process
acetyl Co-enzyme a carboxylase biotin carboxylase subunit	Phvul.002G302900.1	catalytic activity,biotin carboxylase activity,ATP binding,metabolic process,ligase activity,metal ion binding
profilin 2	Phvul.002G307600.1	actin binding,actin cytoskeleton organization
NADP-malic enzyme 3	Phvul.002G309600.1	malic enzyme activity,malate dehydrogenase (decarboxylating) activity,malate metabolic process,NAD binding,oxidation-reduction process
Glyoxalase/Bleomycin resistance protein/Dioxygenase superfamily protein	Phvul.002G310700.1	lactoylglutathione lyase activity,metal ion binding
ATP-dependent caseinolytic (Clp) protease/crotonase family protein	Phvul.002G314900.1	catalytic activity,metabolic process
Ribosomal protein S7e family protein	Phvul.002G317200.1	structural constituent of ribosome,intracellular,ribosome,translation
Ribosomal protein S19 family protein	Phvul.002G320200.1	RNA binding,structural constituent of ribosome,ribosome,translation,small ribosomal subunit
semialdehyde dehydrogenase family protein	Phvul.002G323900.1	N-acetyl-gamma-glutamyl-phosphate reductase activity,aspartate-semialdehyde dehydrogenase activity,cytoplasm,cellular amino acid biosynthetic process,methionine biosynthetic process,threonine biosynthetic process,lysine biosynthetic process via diaminopimelate,isoleucine biosynthetic process,oxidoreductase activity, acting on the aldehyde or oxo group of donors, NAD or NADP as acceptor,protein di…
Ribosomal protein S5 domain 2-like superfamily protein	Phvul.002G324300.1	structural constituent of ribosome,ribosome,translation
Calcium-binding EF-hand family protein	Phvul.002G329300.1	calcium ion binding
Peptidase M2Unknown/M25/M4Unknown family protein	Phvul.003G001200.1	aminoacylase activity,cytoplasm,proteolysis,cellular amino acid metabolic process,metabolic process,metallopeptidase activity,hydrolase activity
U2 small nuclear ribonucleoprotein A	Phvul.003G001500.1	protein binding
Ribosomal protein S5 family protein	Phvul.003G018300.1	RNA binding,structural constituent of ribosome,ribosome,translation,small ribosomal subunit
Ribosomal protein L6 family protein	Phvul.003G025200.1	structural constituent of ribosome,intracellular,ribosome,translation
alpha-xylosidase 1	Phvul.003G035400.1	catalytic activity,hydrolase activity, hydrolyzing O-glycosyl compounds,carbohydrate metabolic process
Transketolase	Phvul.003G037400.1	catalytic activity,transketolase activity,metabolic process
reversibly glycosylated polypeptide 3	Phvul.003G040000.1	intramolecular transferase activity,cellulose biosynthetic process
poly(A) binding protein 2	Phvul.003G047500.1	nucleotide binding,nucleic acid binding,RNA binding
S-adenosyl-L-homocysteine hydrolase	Phvul.003G051200.1	adenosylhomocysteinase activity,one-carbon metabolic process
O-acetylserine (thiol) lyase isoform C	Phvul.003G060200.1	cysteine synthase activity,cysteine biosynthetic process from serine
Oxidoreductase, zinc-binding dehydrogenase family protein	Phvul.003G060300.1	zinc ion binding,oxidoreductase activity,transferase activity, transferring acyl groups other than amino-acyl groups,oxidation-reduction process
DC1 domain-containing protein	Phvul.003G061100.1	antioxidant activity,oxidoreductase activity,cell redox homeostasis,protein-disulfide reductase activity,oxidation-reduction process
voltage dependent anion channel 1	Phvul.003G069300.1	mitochondrial outer membrane,anion transport,voltage-gated anion channel activity,regulation of anion transport,transmembrane transport
glyoxalase I homolog	Phvul.003G079700.1	lactoylglutathione lyase activity,metal ion binding
Glycine cleavage T-protein family	Phvul.003G080400.1	aminomethyltransferase activity,cytoplasm,glycine catabolic process
Nucleotide-diphospho-sugar transferases superfamily protein	Phvul.003G090900.1	catalytic activity,isoprenoid biosynthetic process
MLP-like protein 423	Phvul.003G109100.1	defense response,response to biotic stimulus
MLP-like protein 423	Phvul.003G109200.1	defense response,response to biotic stimulus
ribosomal protein S1	Phvul.003G118600.1	RNA binding,structural constituent of ribosome,ribosome,translation
mitochondrial lipoamide dehydrogenase 1	Phvul.003G118800.1	dihydrolipoyl dehydrogenase activity,oxidoreductase activity,oxidoreductase activity, acting on a sulfur group of donors, NAD(P) as acceptor,cell redox homeostasis,flavin adenine dinucleotide binding,oxidation-reduction process
S-adenosylmethionine synthetase family protein	Phvul.003G120000.1	methionine adenosyltransferase activity,ATP binding,S-adenosylmethionine biosynthetic process
Thioredoxin superfamily protein	Phvul.003G128100.1	antioxidant activity,oxidoreductase activity,oxidation-reduction process
chaperonin 2Unknown	Phvul.003G128900.1	ATP binding,cytoplasm,protein folding
Cysteine proteinases superfamily protein	Phvul.003G130600.1	proteolysis,cysteine-type peptidase activity
germin 3	Phvul.003G131400.1	manganese ion binding,nutrient reservoir activity
eukaryotic translation initiation factor 4A1	Phvul.003G134800.1	nucleic acid binding,helicase activity,ATP binding,ATP-dependent helicase activity
nucleosome assembly protein 1;2	Phvul.003G135500.1	nucleus,nucleosome assembly
MIF4G domain-containing protein / MA3 domain-containing protein	Phvul.003G154900.1	RNA binding,protein binding
aldehyde dehydrogenase 11A3	Phvul.003G157200.1	metabolic process,oxidoreductase activity,oxidoreductase activity, acting on the aldehyde or oxo group of donors, NAD or NADP as acceptor,oxidation-reduction process
DnaJ/Hsp4Unknown cysteine-rich domain superfamily protein	Phvul.003G164500.1	heat shock protein binding,unfolded protein binding
blue-copper-binding protein	Phvul.003G166500.1	copper ion binding,electron carrier activity
Phvul.UnknownUnknown3G1667UnknownUnknown.1	Phvul.003G166700.1	copper ion binding,electron carrier activity
purple acid phosphatase 26	Phvul.003G170500.2	acid phosphatase activity,hydrolase activity,metal ion binding
purple acid phosphatase 26	Phvul.003G170600.1	acid phosphatase activity,hydrolase activity,metal ion binding
Cyclophilin-like peptidyl-prolyl cis-trans isomerase family protein	Phvul.003G178500.1	peptidyl-prolyl cis-trans isomerase activity,protein folding
glycine-rich RNA-binding protein 3	Phvul.003G184700.1	nucleotide binding,nucleic acid binding
photosystem I subunit F	Phvul.003G186300.1	photosystem I,photosystem I reaction center,photosynthesis
D-ribulose-5-phosphate-3-epimerase	Phvul.003G188800.1	catalytic activity,carbohydrate metabolic process,racemase and epimerase activity, acting on carbohydrates and derivatives
malate dehydrogenase	Phvul.003G189700.1	catalytic activity,carbohydrate metabolic process,malate metabolic process,oxidoreductase activity,malate dehydrogenase activity,oxidoreductase activity, acting on the CH-OH group of donors, NAD or NADP as acceptor,L-malate dehydrogenase activity,oxidation-reduction process
Ribosomal protein S4	Phvul.003G191200.1	RNA binding,structural constituent of ribosome,intracellular,translation,small ribosomal subunit,rRNA binding
Ribosomal protein L18e/L15 superfamily protein	Phvul.003G204100.1	structural constituent of ribosome,intracellular,ribosome,translation
RAB GTPase homolog E1B	Phvul.003G205600.1	translation elongation factor activity,GTPase activity,GTP binding,intracellular,translational elongation
chloroplast RNA-binding protein 31B	Phvul.003G206700.1	nucleotide binding,nucleic acid binding
nucleoside diphosphate kinase 2	Phvul.003G208500.1	nucleoside diphosphate kinase activity,ATP binding,nucleoside diphosphate phosphorylation,GTP biosynthetic process,UTP biosynthetic process,CTP biosynthetic process
adenylate kinase 1	Phvul.003G209400.1	adenylate kinase activity,ATP binding,nucleobase-containing compound metabolic process,phosphotransferase activity, phosphate group as acceptor,nucleobase-containing compound kinase activity
ATP synthase delta-subunit gene	Phvul.003G211100.1	ATP synthesis coupled proton transport,membrane,proton-transporting ATP synthase activity, rotational mechanism
Glucose-methanol-choline (GMC) oxidoreductase family protein	Phvul.003G213000.1	oxidoreductase activity, acting on CH-OH group of donors,flavin adenine dinucleotide binding,oxidation-reduction process
HSP7Unknown-interacting protein 1	Phvul.003G214200.1	protein binding
Translation elongation factor EFG/EF2 protein	Phvul.003G217300.1	translation elongation factor activity,GTPase activity,GTP binding,intracellular,translational elongation
expansin-like B1	Phvul.003G228000.1	extracellular region
root hair specific 19	Phvul.003G236500.1	peroxidase activity,response to oxidative stress,heme binding,oxidation-reduction process
Subtilase family protein	Phvul.003G237300.1	serine-type endopeptidase activity,proteolysis,identical protein binding,negative regulation of catalytic activity
photosystem II subunit P-1	Phvul.003G247600.1	calcium ion binding,photosystem II,oxygen evolving complex,photosynthesis,extrinsic to membrane
photosystem II subunit O-2	Phvul.003G249800.1	calcium ion binding,photosystem II,oxygen evolving complex,photosynthesis,extrinsic to membrane,photosystem II stabilization
peptidylprolyl cis/trans isomerase, NIMA-interacting 1	Phvul.003G260800.1	isomerase activity
Ribosomal protein L2 family	Phvul.003G261000.1	structural constituent of ribosome,intracellular,ribosome,translation
ferredoxin-NADP(+)-oxidoreductase 1	Phvul.003G263200.1	oxidoreductase activity,oxidation-reduction process
cold shock domain protein 1	Phvul.003G263300.1	nucleic acid binding,DNA binding,regulation of transcription, DNA-dependent,zinc ion binding
S phase kinase-associated protein 1	Phvul.003G265900.1	ubiquitin-dependent protein catabolic process
ARF-GAP domain 8	Phvul.003G285000.1	ARF GTPase activator activity,zinc ion binding,regulation of ARF GTPase activity
serine transhydroxymethyltransferase 1	Phvul.003G286600.1	catalytic activity,glycine hydroxymethyltransferase activity,glycine metabolic process,L-serine metabolic process,pyridoxal phosphate binding
ferredoxin/thioredoxin reductase subunit A (variable subunit) 2	Phvul.004G000400.1	lipoate biosynthetic process,photosynthesis,lipoate synthase activity,4 iron, 4 sulfur cluster binding
carbonic anhydrase 1	Phvul.004G013500.1	carbonate dehydratase activity,zinc ion binding,carbon utilization
DegP protease 1	Phvul.004G013600.1	serine-type endopeptidase activity,protein binding,proteolysis
cyclophilin 38	Phvul.004G017000.1	peptidyl-prolyl cis-trans isomerase activity,protein folding
Heavy metal transport/detoxification superfamily protein	Phvul.004G019800.1	metal ion transport,metal ion binding
Matrixin family protein	Phvul.004G021000.1	metalloendopeptidase activity,proteolysis,metallopeptidase activity,zinc ion binding,extracellular matrix
biotin carboxyl carrier protein 2	Phvul.004G035000.2	acetyl-CoA carboxylase activity,fatty acid biosynthetic process,acetyl-CoA carboxylase complex
photosystem I light harvesting complex gene 1	Phvul.004G071500.1	photosynthesis, light harvesting,membrane
translocase of outer membrane 2Unknown kDa subunit 3	Phvul.004G072400.1	protein binding,mitochondrial outer membrane translocase complex,protein import into mitochondrial outer membrane
GTP binding Elongation factor Tu family protein	Phvul.004G075100.1	translation elongation factor activity,GTPase activity,GTP binding,cytoplasm,translational elongation
plastid ribosomal protein l11	Phvul.004G090600.1	structural constituent of ribosome,ribosome,translation
chlorophyll A/B binding protein 1	Phvul.004G091600.1	photosynthesis, light harvesting,membrane
chitinase A	Phvul.004G101500.1	hydrolase activity, hydrolyzing O-glycosyl compounds,carbohydrate metabolic process
phosphatase-related	Phvul.004G104600.1	protein binding
Calcium-dependent lipid-binding (CaLB domain) family protein	Phvul.004G110400.1	protein binding
Ribosomal protein L6 family	Phvul.004G116200.1	structural constituent of ribosome,intracellular,ribosome,translation,rRNA binding
2 iron, 2 sulfur cluster binding	Phvul.004G125800.1	intracellular membrane-bounded organelle,2 iron, 2 sulfur cluster binding
light harvesting complex of photosystem II 5	Phvul.004G128200.1	photosynthesis, light harvesting,membrane
Kunitz family trypsin and protease inhibitor protein	Phvul.004G137600.1	endopeptidase inhibitor activity
Translation initiation factor eIF3 subunit	Phvul.004G141100.1	translation initiation factor activity,cytoplasm,eukaryotic translation initiation factor 3 complex
pyrimidine 1	Phvul.004G148000.1	catalytic activity,dihydroorotate dehydrogenase activity,dihydroorotate oxidase activity,cytoplasm,UMP biosynthetic process,oxidation-reduction process
thioredoxin-dependent peroxidase 1	Phvul.004G166100.1	oxidoreductase activity
elongation factor Ts family protein	Phvul.004G168100.1	RNA binding,translation elongation factor activity,protein binding,intracellular,translational elongation
NADP-malic enzyme 4	Phvul.004G170800.1	malic enzyme activity,malate dehydrogenase (decarboxylating) activity,malate metabolic process,NAD binding,oxidation-reduction process
HAD superfamily, subfamily IIIB acid phosphatase	Phvul.004G174200.1	acid phosphatase activity
photosystem I subunit G	Phvul.005G004000.1	photosystem I,photosynthesis,membrane,chlorophyll binding
ankyrin repeat-containing 2B	Phvul.005G006400.1	protein binding
Ribosomal L5P family protein	Phvul.005G011400.1	structural constituent of ribosome,intracellular,ribosome,translation
Ribosomal protein S19e family protein	Phvul.005G018600.1	structural constituent of ribosome,intracellular,ribosome,translation
Mog1/PsbP/DUF1795-like photosystem II reaction center PsbP family protein	Phvul.005G020200.1	calcium ion binding,photosystem II,oxygen evolving complex,photosynthesis,extrinsic to membrane
RNA-binding (RRM/RBD/RNP motifs) family protein	Phvul.005G039000.1	nucleotide binding,nucleic acid binding
Phosphoglycerate kinase family protein	Phvul.005G050700.1	phosphoglycerate kinase activity,glycolysis
phosphoglycerate kinase	Phvul.005G050800.1	phosphoglycerate kinase activity,glycolysis
TCP-1/cpn6Unknown chaperonin family protein	Phvul.005G051700.1	ATP binding,cytoplasm,protein folding,protein refolding,cellular protein metabolic process
Aldolase-type TIM barrel family protein	Phvul.005G051800.1	catalytic activity,FMN binding,oxidoreductase activity,oxidation-reduction process
photosystem II subunit R	Phvul.005G055200.1	photosystem II,oxygen evolving complex,photosynthesis,thylakoid membrane
Ribosomal protein S5/Elongation factor G/III/V family protein	Phvul.005G058100.1	GTPase activity,GTP binding
proteasome subunit PAB1	Phvul.005G059300.1	endopeptidase activity,threonine-type endopeptidase activity,proteasome core complex,ubiquitin-dependent protein catabolic process,proteasome core complex, alpha-subunit complex,proteolysis involved in cellular protein catabolic process
related to ubiquitin 1	Phvul.005G060100.1	protein binding,cytoskeleton
glyoxalase II 3	Phvul.005G062700.1	hydrolase activity
thioredoxin M-type 4	Phvul.005G071200.1	glycerol ether metabolic process,protein disulfide oxidoreductase activity,cell redox homeostasis
early nodulin-like protein 1	Phvul.005G073200.1	copper ion binding,electron carrier activity
gamma-glutamyl hydrolase 1	Phvul.005G080600.1	catalytic activity,glutamine metabolic process,omega peptidase activity,hydrolase activity
protochlorophyllide oxidoreductase A	Phvul.005G083700.1	metabolic process,oxidoreductase activity,protochlorophyllide reductase activity,oxidation-reduction process
light-harvesting chlorophyll B-binding protein 3	Phvul.005G085800.1	photosynthesis, light harvesting,membrane
ketol-acid reductoisomerase	Phvul.005G095900.1	ketol-acid reductoisomerase activity,cellular amino acid biosynthetic process,branched-chain amino acid biosynthetic process,oxidoreductase activity,oxidoreductase activity, acting on the CH-OH group of donors, NAD or NADP as acceptor,coenzyme binding,oxidation-reduction process
6UnknownS acidic ribosomal protein family	Phvul.005G104700.1	structural constituent of ribosome,intracellular,ribosome,translational elongation
ribosomal protein 5B	Phvul.005G107000.1	RNA binding,structural constituent of ribosome,translation,small ribosomal subunit
photosynthetic electron transfer C	Phvul.005G109400.1	ubiquinol-cytochrome-c reductase activity,plastoquinol--plastocyanin reductase activity,photosynthesis,membrane,oxidoreductase activity,oxidoreductase activity, acting on diphenols and related substances as donors,thylakoid membrane,electron transporter, transferring electrons within cytochrome b6/f complex of photosystem II activity,2 iron, 2 sulfur cluster binding,oxidation-reduction process
6UnknownS acidic ribosomal protein family	Phvul.005G126000.1	structural constituent of ribosome,intracellular,ribosome,translation,translational elongation
PDI-like 1-4	Phvul.005G135600.1	endoplasmic reticulum,glycerol ether metabolic process,protein disulfide oxidoreductase activity,isomerase activity,cell redox homeostasis
triosephosphate isomerase	Phvul.005G144100.1	catalytic activity,triose-phosphate isomerase activity,metabolic process
Leucine-rich repeat (LRR) family protein	Phvul.005G149200.1	protein binding
pfkB-like carbohydrate kinase family protein	Phvul.005G153300.1	ribokinase activity,D-ribose metabolic process,phosphotransferase activity, alcohol group as acceptor
homolog of carrot EP3-3 chitinase	Phvul.005G155800.1	chitinase activity,chitin catabolic process,chitin binding,cell wall macromolecule catabolic process
NDH-dependent cyclic electron flow 1	Phvul.005G170200.1	electron carrier activity,iron-sulfur cluster binding
Embryo-specific protein 3, (ATS3)	Phvul.005G177100.1	protein binding
isopropylmalate dehydrogenase 2	Phvul.005G181600.1	magnesium ion binding,3-isopropylmalate dehydrogenase activity,cytoplasm,leucine biosynthetic process,oxidoreductase activity, acting on the CH-OH group of donors, NAD or NADP as acceptor,NAD binding,oxidation-reduction process
cystatin B	Phvul.006G018600.1	cysteine-type endopeptidase inhibitor activity
NAD(P)-linked oxidoreductase superfamily protein	Phvul.006G028400.1	oxidoreductase activity,oxidation-reduction process
alanine:glyoxylate aminotransferase	Phvul.006G029100.1	catalytic activity,metabolic process,pyridoxal phosphate binding
endoribonuclease L-PSP family protein	Phvul.006G043400.1	deaminase activity
small ubiquitin-like modifier 2	Phvul.006G047600.1	protein binding
SHV3-like 2	Phvul.006G050400.1	glycerol metabolic process,lipid metabolic process,phosphoric diester hydrolase activity,glycerophosphodiester phosphodiesterase activity
Ribosomal protein S1Unknownp/S2Unknowne family protein	Phvul.006G055300.1	RNA binding,structural constituent of ribosome,intracellular,ribosome,translation
cyclophilin 5	Phvul.006G068200.1	peptidyl-prolyl cis-trans isomerase activity,protein folding
Phvul.UnknownUnknown6GUnknown729UnknownUnknown.1	Phvul.006G072900.1	nucleotide binding,nucleic acid binding,zinc ion binding
hydroxyproline-rich glycoprotein family protein	Phvul.006G083300.1	nucleus,cytoplasm
Ribosomal protein S11 family protein	Phvul.006G095400.1	structural constituent of ribosome,ribosome,translation
copper/zinc superoxide dismutase 1	Phvul.006G097000.1	superoxide dismutase activity,superoxide metabolic process,metal ion binding,oxidation-reduction process
O-acetylserine (thiol) lyase (OAS-TL) isoform A1	Phvul.006G099100.1	cysteine synthase activity,cysteine biosynthetic process from serine
Ribose 5-phosphate isomerase, type A protein	Phvul.006G100600.1	ribose-5-phosphate isomerase activity,pentose-phosphate shunt, non-oxidative branch
GDP-D-mannose 3\',5\'-epimerase	Phvul.006G101600.1	catalytic activity,cellular metabolic process,coenzyme binding
pathogenesis-related 4	Phvul.006G102200.1	chitin binding,defense response to bacterium,defense response to fungus
pathogenesis-related 4	Phvul.006G102300.1	defense response to bacterium,defense response to fungus
Li-tolerant lipase 1	Phvul.006G107100.1	lipid metabolic process,hydrolase activity, acting on ester bonds
GDSL-like Lipase/Acylhydrolase superfamily protein	Phvul.006G107300.1	lipid metabolic process,hydrolase activity, acting on ester bonds
non-photochemical quenching 1	Phvul.006G108200.1	chloroplast,violaxanthin de-epoxidase activity,oxidation-reduction process
ribosomal protein S1	Phvul.006G121100.1	RNA binding
tubulin beta 8	Phvul.006G126100.1	GTPase activity,structural constituent of cytoskeleton,GTP binding,microtubule,GTP catabolic process,microtubule-based process,protein complex,protein polymerization
peroxidase 2	Phvul.006G129600.1	peroxidase activity,response to oxidative stress,heme binding,oxidation-reduction process
Peroxidase superfamily protein	Phvul.006G129700.1	peroxidase activity,response to oxidative stress,heme binding,oxidation-reduction process
actin depolymerizing factor 3	Phvul.006G132700.1	actin binding,intracellular
Inositol monophosphatase family protein	Phvul.006G142400.1	phosphatidylinositol phosphorylation
fibrillin	Phvul.006G145100.1	structural molecule activity,chloroplast
ATPase, F1 complex, gamma subunit protein	Phvul.006G149700.1	ATP synthesis coupled proton transport,proton-transporting ATP synthase complex, catalytic core F(1),proton-transporting ATP synthase activity, rotational mechanism,proton-transporting ATPase activity, rotational mechanism
peroxiredoxin IIF	Phvul.006G151800.1	oxidoreductase activity
dehydratase family	Phvul.006G152700.1	catalytic activity,dihydroxy-acid dehydratase activity,metabolic process,branched-chain amino acid biosynthetic process
glutamine synthetase 2	Phvul.006G155800.1	catalytic activity,glutamate-ammonia ligase activity,glutamine biosynthetic process,nitrogen compound metabolic process
Ribosomal protein L18ae/LX family protein	Phvul.006G163400.1	structural constituent of ribosome,ribosome,translation
GDSL-like Lipase/Acylhydrolase superfamily protein	Phvul.006G169000.1	lipid metabolic process,hydrolase activity, acting on ester bonds
GDSL-like Lipase/Acylhydrolase superfamily protein	Phvul.006G169100.1	lipid metabolic process,hydrolase activity,hydrolase activity, acting on ester bonds
GDSL-like Lipase/Acylhydrolase superfamily protein	Phvul.006G169400.1	lipid metabolic process,hydrolase activity, acting on ester bonds
Aldolase-type TIM barrel family protein	Phvul.006G171100.1	catalytic activity,pyridoxal phosphate biosynthetic process
Cysteine proteinases superfamily protein	Phvul.006G176800.1	cysteine-type peptidase activity
P-loop containing nucleoside triphosphate hydrolases superfamily protein	Phvul.006G178400.1	nucleotide binding,ATP binding,porphyrin-containing compound biosynthetic process,photosynthesis,chlorophyll biosynthetic process,magnesium chelatase activity,nucleoside-triphosphatase activity
Ribosomal protein S6e	Phvul.006G184300.1	structural constituent of ribosome,intracellular,ribosome,translation
allantoinase	Phvul.006G186800.1	allantoin catabolic process,allantoinase activity,zinc ion binding,hydrolase activity,cobalt ion binding
Ribonuclease E inhibitor RraA/Dimethylmenaquinone methyltransferase	Phvul.006G196200.1	ribonuclease inhibitor activity,regulation of RNA metabolic process
CAP (Cysteine-rich secretory proteins, Antigen 5, and Pathogenesis-related 1 protein) superfamily protein	Phvul.006G197200.1	extracellular region
pyrophosphorylase 6	Phvul.006G198500.1	magnesium ion binding,inorganic diphosphatase activity,cytoplasm,phosphate-containing compound metabolic process
methionine sulfoxide reductase B 2	Phvul.006G198700.1	peptide-methionine (R)-S-oxide reductase activity,oxidation-reduction process
UDP-glucosyl transferase 78D2	Phvul.006G201100.1	metabolic process,transferase activity, transferring hexosyl groups
light harvesting complex photosystem II subunit 6	Phvul.006G207300.1	photosynthesis, light harvesting,membrane
beta-D-xylosidase 4	Phvul.006G208200.1	hydrolase activity, hydrolyzing O-glycosyl compounds,carbohydrate metabolic process
Ubiquinol-cytochrome C reductase hinge protein	Phvul.006G209400.1	mitochondrial electron transport, ubiquinol to cytochrome c,ubiquinol-cytochrome-c reductase activity
Plastid-lipid associated protein PAP / fibrillin family protein	Phvul.006G214200.1	structural molecule activity,chloroplast
2Fe-2S ferredoxin-like superfamily protein	Phvul.006G216700.1	electron carrier activity,electron transport chain,iron-sulfur cluster binding,2 iron, 2 sulfur cluster binding
2Fe-2S ferredoxin-like superfamily protein	Phvul.006G216800.1	electron carrier activity,electron transport chain,iron-sulfur cluster binding,2 iron, 2 sulfur cluster binding
chloroplast heat shock protein 7Unknown-2	Phvul.006G219500.1	ATP binding,protein folding,unfolded protein binding
chloroplast heat shock protein 7Unknown-2	Phvul.006G219600.1	ATP binding,protein folding,unfolded protein binding
RAB GTPase 11C	Phvul.006G220200.1	GTPase activity,GTP binding,intracellular,GTP catabolic process,intracellular protein transport,nucleocytoplasmic transport,signal transduction,small GTPase mediated signal transduction,protein transport
cyclophilin 2Unknown-2	Phvul.007G001100.1	peptidyl-prolyl cis-trans isomerase activity,protein folding
DnaJ/Hsp4Unknown cysteine-rich domain superfamily protein	Phvul.007G006200.1	heat shock protein binding,unfolded protein binding
Transketolase	Phvul.007G006600.1	catalytic activity,transketolase activity,metabolic process
dehydroascorbate reductase 2	Phvul.007G009800.1	protein binding
thioredoxin X	Phvul.007G015500.1	glycerol ether metabolic process,protein disulfide oxidoreductase activity,cell redox homeostasis
NADH-ubiquinone oxidoreductase B18 subunit, putative	Phvul.007G019800.1	NADH dehydrogenase activity,mitochondrion,NADH dehydrogenase (ubiquinone) activity
2UnknownS proteasome alpha subunit E2	Phvul.007G021000.1	endopeptidase activity,threonine-type endopeptidase activity,proteasome core complex,ubiquitin-dependent protein catabolic process,proteasome core complex, alpha-subunit complex,proteolysis involved in cellular protein catabolic process
2-oxoacid dehydrogenases acyltransferase family protein	Phvul.007G026300.1	metabolic process,transferase activity, transferring acyl groups
Rad23 UV excision repair protein family	Phvul.007G026400.1	damaged DNA binding,protein binding,nucleus,nucleotide-excision repair,proteasomal ubiquitin-dependent protein catabolic process
ATP synthase alpha/beta family protein	Phvul.007G034800.1	nucleotide binding,mitochondrial proton-transporting ATP synthase complex, catalytic core F(1),ATP binding,ATP catabolic process,ATP biosynthetic process,ATP synthesis coupled proton transport,ATP hydrolysis coupled proton transport,proton transport,hydrolase activity, acting on acid anhydrides, catalyzing transmembrane movement of substances,ATPase activity,nucleoside-triphosphatase activity,pro…
FAD/NAD(P)-binding oxidoreductase	Phvul.007G035000.1	oxidoreductase activity,oxidation-reduction process
PTEN 2	Phvul.007G038300.1	protein tyrosine phosphatase activity,protein binding,dephosphorylation,phosphatase activity
photosystem I subunit D-2	Phvul.007G055900.1	photosystem I,photosystem I reaction center,photosynthesis
Ribosomal protein S3Ae	Phvul.007G060700.1	structural constituent of ribosome,intracellular,ribosome,translation
phosphoglucomutase	Phvul.007G064900.1	magnesium ion binding,carbohydrate metabolic process,intramolecular transferase activity, phosphotransferases
membrane steroid binding protein 1	Phvul.007G068900.1	heme binding
Concanavalin A-like lectin protein kinase family protein	Phvul.007G070300.1	carbohydrate binding
Bacterial sec-independent translocation protein mttA/Hcf1Unknown6	Phvul.007G073200.1	plasma membrane,protein transporter activity,protein secretion,protein transport,membrane,integral to membrane
Unknown	Phvul.007G080400.1	response to stress
Ribosomal protein S13/S18 family	Phvul.007G080500.1	RNA binding,structural constituent of ribosome,intracellular,ribosome,translation
thioredoxin Y1	Phvul.007G080600.1	glycerol ether metabolic process,protein disulfide oxidoreductase activity,cell redox homeostasis
ribosomal protein 1	Phvul.007G081800.1	structural constituent of ribosome,intracellular,ribosome,translation
Peroxidase superfamily protein	Phvul.007G082600.1	peroxidase activity,response to oxidative stress,heme binding,oxidation-reduction process
Peroxidase superfamily protein	Phvul.007G082700.1	peroxidase activity,response to oxidative stress,heme binding,oxidation-reduction process
RAB GTPase homolog G3A	Phvul.007G085200.1	GTPase activity,GTP binding,intracellular,GTP catabolic process,intracellular protein transport,nucleocytoplasmic transport,signal transduction,small GTPase mediated signal transduction,protein transport
Ribosomal protein L21	Phvul.007G089400.1	RNA binding,structural constituent of ribosome,intracellular,ribosome,translation
Unknown	Phvul.007G091500.1	regulation of translational fidelity
ATP synthase D chain, mitochondrial	Phvul.007G092100.1	mitochondrial proton-transporting ATP synthase complex, coupling factor F(o),hydrogen ion transmembrane transporter activity,ATP synthesis coupled proton transport
Plastid-lipid associated protein PAP / fibrillin family protein	Phvul.007G124100.1	structural molecule activity,chloroplast
RNA-binding (RRM/RBD/RNP motifs) family protein	Phvul.007G130600.1	nucleotide binding,nucleic acid binding
lactate/malate dehydrogenase family protein	Phvul.007G140600.1	catalytic activity,carbohydrate metabolic process,malate metabolic process,oxidoreductase activity,malate dehydrogenase activity,oxidoreductase activity, acting on the CH-OH group of donors, NAD or NADP as acceptor,malate dehydrogenase (NADP+) activity,oxidation-reduction process
ATPase, AAA-type, CDC48 protein	Phvul.007G149400.1	nucleotide binding,ATP binding,hydrolase activity,nucleoside-triphosphatase activity
adenosine kinase 2	Phvul.007G150300.1	adenosine kinase activity,purine ribonucleoside salvage,phosphotransferase activity, alcohol group as acceptor
RNA-binding (RRM/RBD/RNP motifs) family protein	Phvul.007G150700.1	nucleotide binding,nucleic acid binding
photosystem II reaction center PSB28 protein	Phvul.007G153500.1	photosystem II,oxygen evolving complex,photosynthesis,membrane
Glutaredoxin family protein	Phvul.007G155300.1	electron carrier activity,protein disulfide oxidoreductase activity,cell redox homeostasis
photosystem I subunit E-2	Phvul.007G155500.1	photosystem I,photosystem I reaction center,photosynthesis
Ribosomal protein L4/L1 family	Phvul.007G162900.1	structural constituent of ribosome,ribosome,translation
chloroplast stem-loop binding protein of 41 kDa	Phvul.007G172100.1	catalytic activity,cellular metabolic process,coenzyme binding
ribosome recycling factor, chloroplast precursor	Phvul.007G172400.1	translation
glutathione reductase	Phvul.007G177200.1	glutathione-disulfide reductase activity,glutathione metabolic process,oxidoreductase activity,oxidoreductase activity, acting on a sulfur group of donors, NAD(P) as acceptor,cell redox homeostasis,flavin adenine dinucleotide binding,NADP binding,oxidation-reduction process
RNA-binding KH domain-containing protein	Phvul.007G178400.1	RNA binding
seryl-tRNA synthetase / serine--tRNA ligase	Phvul.007G180500.1	nucleotide binding,aminoacyl-tRNA ligase activity,serine-tRNA ligase activity,ATP binding,cytoplasm,tRNA aminoacylation for protein translation,seryl-tRNA aminoacylation
ATP citrate lyase (ACL) family protein	Phvul.007G190800.1	catalytic activity,ATP binding,metabolic process,metal ion binding
Rho termination factor	Phvul.007G192400.1	DNA-dependent transcription, termination
regulatory particle triple-A ATPase 5A	Phvul.007G197100.1	nucleotide binding,ATP binding,cytoplasm,hydrolase activity,nucleoside-triphosphatase activity,protein catabolic process
calreticulin 1a	Phvul.007G200800.1	calcium ion binding,endoplasmic reticulum,protein folding,unfolded protein binding
nuclear encoded CLP protease 5	Phvul.007G213700.1	serine-type endopeptidase activity,proteolysis
thioredoxin family protein	Phvul.007G215900.1	endoplasmic reticulum,glycerol ether metabolic process,protein disulfide oxidoreductase activity,isomerase activity,cell redox homeostasis
vacuolar membrane ATPase 1Unknown	Phvul.007G220600.1	proton transport,vacuolar proton-transporting V-type ATPase complex,hydrolase activity, acting on acid anhydrides, catalyzing transmembrane movement of substances
FKBP-like peptidyl-prolyl cis-trans isomerase family protein	Phvul.007G225600.1	protein folding
6UnknownS acidic ribosomal protein family	Phvul.007G230200.1	structural constituent of ribosome,intracellular,ribosome,translational elongation
monodehydroascorbate reductase 1	Phvul.007G230300.1	oxidoreductase activity,flavin adenine dinucleotide binding,oxidation-reduction process
RNA-binding (RRM/RBD/RNP motifs) family protein	Phvul.007G231600.1	nucleotide binding,nucleic acid binding
isopropyl malate isomerase large subunit 1	Phvul.007G232000.1	metabolic process,cellular amino acid biosynthetic process,hydro-lyase activity,4 iron, 4 sulfur cluster binding
Single hybrid motif superfamily protein	Phvul.007G233300.1	glycine cleavage complex,glycine catabolic process,glycine decarboxylation via glycine cleavage system
Transcriptional coactivator/pterin dehydratase	Phvul.007G240500.1	tetrahydrobiopterin biosynthetic process,4-alpha-hydroxytetrahydrobiopterin dehydratase activity
Proteinase inhibitor, propeptide	Phvul.007G245700.1	serine-type endopeptidase activity,identical protein binding,negative regulation of catalytic activity
ubiquitin E2 variant 1D-4	Phvul.007G270100.1	acid-amino acid ligase activity
Lactate/malate dehydrogenase family protein	Phvul.007G273500.1	catalytic activity,carbohydrate metabolic process,malate metabolic process,oxidoreductase activity,malate dehydrogenase activity,oxidoreductase activity, acting on the CH-OH group of donors, NAD or NADP as acceptor,L-malate dehydrogenase activity,oxidation-reduction process
Transketolase family protein	Phvul.008G00800.1	catalytic activity,metabolic process
Aldolase-type TIM barrel family protein	Phvul.008G003600.1	catalytic activity,sedoheptulose-7-phosphate:D-glyceraldehyde-3-phosphate glyceronetransferase activity,cytoplasm,carbohydrate metabolic process,pentose-phosphate shunt
general regulatory factor 3	Phvul.008G004300.1	protein domain specific binding
FKBP-like peptidyl-prolyl cis-trans isomerase family protein	Phvul.008G009400.1	protein folding
PsbP-like protein 1	Phvul.008G015100.1	calcium ion binding,photosystem II,oxygen evolving complex,photosynthesis,extrinsic to membrane
beta-hexosaminidase 1	Phvul.008G015400.1	hydrolase activity, hydrolyzing O-glycosyl compounds,carbohydrate metabolic process
allene oxide cyclase 4	Phvul.008G020200.1	chloroplast,isomerase activity
voltage dependent anion channel 1	Phvul.008G043800.1	mitochondrial outer membrane,anion transport,voltage-gated anion channel activity,regulation of anion transport,transmembrane transport
ATPase, V1 complex, subunit B protein	Phvul.008G050000.1	ATP binding,ATP hydrolysis coupled proton transport,proton transport,hydrolase activity, acting on acid anhydrides, catalyzing transmembrane movement of substances,proton-transporting two-sector ATPase complex, catalytic domain,proton-transporting V-type ATPase, V1 domain,ATP metabolic process
2-phosphoglycolate phosphatase 1	Phvul.008G051700.1	metabolic process,phosphatase activity
mitochondrial acyl carrier protein 2	Phvul.008G052400.1	fatty acid biosynthetic process
chloroplastic acetylcoenzyme A carboxylase 1	Phvul.008G053000.1	acetyl-CoA carboxylase activity,fatty acid biosynthetic process,acetyl-CoA carboxylase complex
thioredoxin F2	Phvul.008G053300.1	glycerol ether metabolic process,protein disulfide oxidoreductase activity,cell redox homeostasis
CAX interacting protein 1	Phvul.008G055800.1	electron carrier activity,protein disulfide oxidoreductase activity,cell redox homeostasis
Ribosomal L5P family protein	Phvul.008G059200.1	structural constituent of ribosome,intracellular,ribosome,translation
phosphomannomutase	Phvul.008G068100.1	catalytic activity,phosphomannomutase activity,cytoplasm,metabolic process,mannose biosynthetic process
Phosphoglycerate mutase, 2,3-bisphosphoglycerate-independent	Phvul.008G077900.1	catalytic activity,phosphoglycerate mutase activity,cytoplasm,glucose catabolic process,metabolic process,manganese ion binding,metal ion binding
elongation factor P (EF-P) family protein	Phvul.008G082900.1	translation elongation factor activity,cytoplasm,translational elongation,peptide biosynthetic process
lipid transfer protein 4	Phvul.008G087000.1	lipid transport,lipid binding
high cyclic electron flow 1	Phvul.008G112000.1	carbohydrate metabolic process,fructose 1,6-bisphosphate 1-phosphatase activity,phosphoric ester hydrolase activity
Mitochondrial glycoprotein family protein	Phvul.008G115200.1	mitochondrial matrix
Unknown	Phvul.008G118700.1	heat shock protein binding,unfolded protein binding
NAD(P)-binding Rossmann-fold superfamily protein	Phvul.008G119600.1	3-beta-hydroxy-delta5-steroid dehydrogenase activity,steroid biosynthetic process,oxidoreductase activity, acting on the CH-OH group of donors, NAD or NADP as acceptor,oxidation-reduction process
photosystem I subunit E-2	Phvul.008G133700.1	photosystem I,photosystem I reaction center,photosynthesis
Oxidoreductase, zinc-binding dehydrogenase family protein	Phvul.008G151800.1	zinc ion binding,oxidoreductase activity,transferase activity, transferring acyl groups other than amino-acyl groups,oxidation-reduction process
Glutaredoxin family protein	Phvul.008G156300.1	electron carrier activity,protein disulfide oxidoreductase activity,cell redox homeostasis
general regulatory factor 2	Phvul.008G162500.1	protein domain specific binding
cytochrome C oxidase 6B	Phvul.008G176600.1	cytochrome-c oxidase activity,mitochondrion
ascorbate peroxidase 4	Phvul.008G176700.1	peroxidase activity,response to oxidative stress,heme binding,oxidation-reduction process
Metallo-hydrolase/oxidoreductase superfamily protein	Phvul.008G187100.1	hydroxyacylglutathione hydrolase activity,glutathione biosynthetic process,zinc ion binding,hydrolase activity
Aldolase superfamily protein	Phvul.008G189200.1	catalytic activity,fructose-bisphosphate aldolase activity,glycolysis
rubisco activase	Phvul.008G192400.1	ATP binding
photosystem II subunit P-1	Phvul.008G196500.1	calcium ion binding,photosystem II,oxygen evolving complex,photosynthesis,extrinsic to membrane
Glutathione S-transferase, C-terminal-like;Translation elongation factor EF1B/ribosomal protein S6	Phvul.008G204800.1	translation elongation factor activity,eukaryotic translation elongation factor 1 complex,translational elongation
ethylene-forming enzyme	Phvul.008G214200.1	oxidoreductase activity,oxidoreductase activity, acting on paired donors, with incorporation or reduction of molecular oxygen, 2-oxoglutarate as one donor, and incorporation of one atom each of oxygen into both donors,oxidation-reduction process
Ribosomal protein S4 (RPS4A) family protein	Phvul.008G221000.1	RNA binding,structural constituent of ribosome,intracellular,ribosome,translation
Subtilase family protein	Phvul.008G228700.1	serine-type endopeptidase activity,proteolysis,identical protein binding,negative regulation of catalytic activity
Subtilisin-like serine endopeptidase family protein	Phvul.008G229400.1	serine-type endopeptidase activity,proteolysis,identical protein binding,negative regulation of catalytic activity
Subtilisin-like serine endopeptidase family protein	Phvul.008G229500.1	serine-type endopeptidase activity,proteolysis,identical protein binding,negative regulation of catalytic activity
high mobility group A	Phvul.008G236000.1	chromatin,nucleosome,DNA binding,nucleus,nucleosome assembly,regulation of transcription, DNA-dependent
UDP-glucose pyrophosphorylase 2	Phvul.008G240600.1	metabolic process,nucleotidyltransferase activity
eukaryotic translation initiation factor 2 beta subunit	Phvul.008G246100.1	translation initiation factor activity,translational initiation
peptide met sulfoxide reductase 4	Phvul.008G267100.1	peptide-methionine (S)-S-oxide reductase activity,oxidation-reduction process
Ribosomal protein L7Ae/L3Unknowne/S12e/Gadd45 family protein	Phvul.008G269000.1	RNA binding,nucleolus,ribonucleoprotein complex,ribosome biogenesis
Dihydrolipoamide succinyltransferase	Phvul.008G269300.1	dihydrolipoyllysine-residue succinyltransferase activity,tricarboxylic acid cycle,metabolic process,transferase activity, transferring acyl groups,oxoglutarate dehydrogenase complex
tubulin folding cofactor A (KIESEL)	Phvul.008G274500.1	microtubule,tubulin complex assembly,unfolded protein binding
HEAT SHOCK PROTEIN 81.4	Phvul.008G281400.1	ATP binding,protein folding,response to stress,unfolded protein binding
Aldolase superfamily protein	Phvul.008G282000.1	catalytic activity,fructose-bisphosphate aldolase activity,glycolysis
ADP glucose pyrophosphorylase 1	Phvul.008G284000.1	glycogen biosynthetic process,glucose-1-phosphate adenylyltransferase activity,biosynthetic process,nucleotidyltransferase activity
photosystem II light harvesting complex gene 2.1	Phvul.008G285100.1	photosynthesis, light harvesting,membrane
photosystem I light harvesting complex gene 3	Phvul.008G289700.1	photosynthesis, light harvesting,membrane
Coproporphyrinogen III oxidase	Phvul.008G289900.1	coproporphyrinogen oxidase activity,porphyrin-containing compound biosynthetic process,oxidation-reduction process
cold-regulated 47	Phvul.009G004400.1	response to stress,response to water stimulus
glyceraldehyde-3-phosphate dehydrogenase B subunit	Phvul.009G006600.1	glucose metabolic process,oxidoreductase activity, acting on the aldehyde or oxo group of donors, NAD or NADP as acceptor,NADP binding,NAD binding,oxidation-reduction process
catalase 2	Phvul.009G011100.1	catalase activity,response to oxidative stress,heme binding,oxidation-reduction process
Subtilisin-like serine endopeptidase family protein	Phvul.009G018600.1	serine-type endopeptidase activity,proteolysis,identical protein binding,negative regulation of catalytic activity
plastocyanin 1	Phvul.009G020300.1	copper ion binding,electron carrier activity
cold, circadian rhythm, and rna binding 2	Phvul.009G023700.1	nucleotide binding,nucleic acid binding
glycine-rich protein 2B	Phvul.009G025100.1	nucleic acid binding,DNA binding,regulation of transcription, DNA-dependent,zinc ion binding
RNA-binding (RRM/RBD/RNP motifs) family protein	Phvul.009G033600.1	nucleotide binding,nucleic acid binding
nascent polypeptide-associated complex subunit alpha-like protein 2	Phvul.009G038400.1	protein binding
Ribosomal protein L6 family	Phvul.009G039400.1	structural constituent of ribosome,intracellular,ribosome,translation,rRNA binding
3UnknownS ribosomal protein, putative	Phvul.009G045100.1	primary metabolic process
6UnknownS acidic ribosomal protein family	Phvul.009G045800.1	structural constituent of ribosome,intracellular,ribosome,translational elongation
ornithine carbamoyltransferase	Phvul.009G059600.1	cellular amino acid metabolic process,amino acid binding,carboxyl- or carbamoyltransferase activity
adenine phosphoribosyl transferase 1	Phvul.009G070900.1	adenine phosphoribosyltransferase activity,cytoplasm,adenine salvage,nucleoside metabolic process
KH domain-containing protein	Phvul.009G076600.1	RNA binding
KH domain-containing protein	Phvul.009G076800.1	RNA binding
ATPase, FUnknown complex, subunit B/B\', bacterial/chloroplast	Phvul.009G092400.1	hydrogen ion transmembrane transporter activity,ATP synthesis coupled proton transport,proton-transporting ATP synthase complex, coupling factor F(o)
RAN GTPase 3	Phvul.009G095400.1	GTPase activity,GTP binding,intracellular,GTP catabolic process,intracellular protein transport,nucleocytoplasmic transport,signal transduction,small GTPase mediated signal transduction,protein transport
N-terminal nucleophile aminohydrolases (Ntn hydrolases) superfamily protein	Phvul.009G103400.1	endopeptidase activity,threonine-type endopeptidase activity,proteasome core complex,proteolysis involved in cellular protein catabolic process
basic chitinase	Phvul.009G116600.1	chitinase activity,chitin catabolic process,chitin binding,cell wall macromolecule catabolic process
basic chitinase	Phvul.009G116700.1	chitinase activity,chitin catabolic process,chitin binding,cell wall macromolecule catabolic process
Ribosomal protein L3 family protein	Phvul.009G117700.1	structural constituent of ribosome,intracellular,ribosome,translation
glutamate-1-semialdehyde 2,1-aminomutase 2	Phvul.009G118500.1	catalytic activity,transaminase activity,pyridoxal phosphate binding,tetrapyrrole biosynthetic process,glutamate-1-semialdehyde 2,1-aminomutase activity
thylakoidal ascorbate peroxidase	Phvul.009G126500.1	peroxidase activity,response to oxidative stress,heme binding,oxidation-reduction process
PDI-like 1-2	Phvul.009G126800.1	endoplasmic reticulum,glycerol ether metabolic process,protein disulfide oxidoreductase activity,isomerase activity,cell redox homeostasis
Aldolase superfamily protein	Phvul.009G127100.1	catalytic activity,porphobilinogen synthase activity,tetrapyrrole biosynthetic process,metal ion binding
thioredoxin M-type 4	Phvul.009G133900.1	glycerol ether metabolic process,protein disulfide oxidoreductase activity,cell redox homeostasis
Mog1/PsbP/DUF1795-like photosystem II reaction center PsbP family protein	Phvul.009G134500.1	calcium ion binding,photosystem II,oxygen evolving complex,photosynthesis,extrinsic to membrane
manganese superoxide dismutase 1	Phvul.009G141600.1	superoxide dismutase activity,superoxide metabolic process,metal ion binding,oxidation-reduction process
Eukaryotic aspartyl protease family protein	Phvul.009G144100.1	aspartic-type endopeptidase activity,proteolysis
ribulose-bisphosphate carboxylases	Phvul.009G144500.1	magnesium ion binding,carbon fixation,ribulose-bisphosphate carboxylase activity
CLPC homologue 1	Phvul.009G162100.1	nucleotide binding,protein binding,ATP binding,nucleoside-triphosphatase activity,protein metabolic process
glyceraldehyde-3-phosphate dehydrogenase C2	Phvul.009G168400.1	oxidoreductase activity, acting on the aldehyde or oxo group of donors, NAD or NADP as acceptor,oxidation-reduction process
31-kDa RNA binding protein	Phvul.009G171500.1	nucleotide binding,nucleic acid binding
polygalacturonase inhibiting protein 1	Phvul.009G180400.1	protein binding
eukaryotic elongation factor 5A-1	Phvul.009G184600.1	RNA binding,translation elongation factor activity,translational frameshifting,peptidyl-lysine modification to hypusine,ribosome binding,positive regulation of translational elongation,positive regulation of translational termination
Cytosol aminopeptidase family protein	Phvul.009G195000.1	aminopeptidase activity,intracellular,cytoplasm,proteolysis,metalloexopeptidase activity,protein metabolic process,manganese ion binding
Tetratricopeptide repeat (TPR)-like superfamily protein	Phvul.009G195600.1	protein binding
Co-chaperone GrpE family protein	Phvul.009G196500.1	adenyl-nucleotide exchange factor activity,protein folding,protein homodimerization activity,chaperone binding
adenylate kinase family protein	Phvul.009G208900.1	adenylate kinase activity,ATP binding,nucleobase-containing compound metabolic process,phosphotransferase activity, phosphate group as acceptor,nucleobase-containing compound kinase activity
photosystem I subunit K	Phvul.009G216400.1	photosystem I,photosynthesis,membrane
chaperonin 2Unknown	Phvul.009G224900.1	ATP binding,cytoplasm,protein folding
aleurain-like protease	Phvul.009G227100.1	proteolysis,cysteine-type peptidase activity
germin 3	Phvul.009G227800.1	manganese ion binding,nutrient reservoir activity
Transducin family protein / WD-4Unknown repeat family protein	Phvul.009G232200.1	protein binding
plasma-membrane associated cation-binding protein 1	Phvul.009G245700.1	anchored to plasma membrane,cellular response to stimulus
MLP-like protein 423	Phvul.009G252400.1	defense response,response to biotic stimulus
MLP-like protein 423	Phvul.009G253000.1	defense response,response to biotic stimulus
lipoamide dehydrogenase 1	Phvul.009G254900.1	dihydrolipoyl dehydrogenase activity,oxidoreductase activity,oxidoreductase activity, acting on a sulfur group of donors, NAD(P) as acceptor,cell redox homeostasis,flavin adenine dinucleotide binding,oxidation-reduction process
Glycosyl hydrolase superfamily protein	Phvul.009G256400.1	hydrolase activity, hydrolyzing O-glycosyl compounds,carbohydrate metabolic process
light harvesting complex photosystem II	Phvul.010G002100.1	photosynthesis, light harvesting,membrane
NAD(P)-binding Rossmann-fold superfamily protein	Phvul.010G011300.1	3-beta-hydroxy-delta5-steroid dehydrogenase activity,steroid biosynthetic process,oxidoreductase activity, acting on the CH-OH group of donors, NAD or NADP as acceptor,oxidation-reduction process
uracil phosphoribosyltransferase	Phvul.010G015300.1	uracil phosphoribosyltransferase activity,uridine kinase activity,ATP binding,uracil salvage,nucleoside metabolic process,phosphotransferase activity, alcohol group as acceptor
NAD(P)-linked oxidoreductase superfamily protein	Phvul.010G017100.1	oxidoreductase activity,oxidation-reduction process
FK5Unknown6- and rapamycin-binding protein 15 kD-2	Phvul.010G024400.1	protein folding
Ribosomal protein S8e family protein	Phvul.010G024600.1	structural constituent of ribosome,intracellular,ribosome,translation
ATP synthase epsilon chain	Phvul.010G031400.1	ATP synthesis coupled proton transport,proton-transporting ATP synthase complex, catalytic core F(1),proton-transporting ATP synthase activity, rotational mechanism,proton-transporting ATPase activity, rotational mechanism
P-loop containing nucleoside triphosphate hydrolases superfamily protein	Phvul.010G040800.1	ATP binding,nucleobase-containing compound metabolic process,phosphotransferase activity, phosphate group as acceptor,nucleotide kinase activity,nucleobase-containing compound kinase activity,nucleotide phosphorylation
GroES-like family protein	Phvul.010G041700.1	cytoplasm,protein folding
ATPase, F1 complex, delta/epsilon subunit	Phvul.010G042900.1	ATP synthesis coupled proton transport,proton-transporting ATP synthase complex, catalytic core F(1),proton-transporting ATP synthase activity, rotational mechanism,proton-transporting ATPase activity, rotational mechanism
Nucleoside diphosphate kinase family protein	Phvul.010G045400.1	nucleoside diphosphate kinase activity,ATP binding,nucleoside diphosphate phosphorylation,GTP biosynthetic process,UTP biosynthetic process,CTP biosynthetic process
Acyl transferase/acyl hydrolase/lysophospholipase superfamily protein	Phvul.010G047000.1	lipid metabolic process
ribosomal protein L4	Phvul.010G048100.1	structural constituent of ribosome,ribosome,translation
photosystem II subunit Q-2	Phvul.010G052300.1	calcium ion binding,photosystem II,oxygen evolving complex,photosynthesis,extrinsic to membrane
lipid transfer protein 1	Phvul.010G066400.1	lipid transport,lipid binding
lipid transfer protein 3	Phvul.010G069100.1	lipid transport,lipid binding
lipid transfer protein 6	Phvul.010G069500.1	lipid transport,lipid binding
ribosomal protein S13A	Phvul.010G082900.1	structural constituent of ribosome,intracellular,ribosome,translation
Calcium-dependent lipid-binding (CaLB domain) family protein	Phvul.010G093800.1	protein binding
glyoxylate reductase 1	Phvul.010G109500.1	phosphogluconate dehydrogenase (decarboxylating) activity,pentose-phosphate shunt,valine metabolic process,3-hydroxyisobutyrate dehydrogenase activity,oxidoreductase activity,oxidoreductase activity, acting on the CH-OH group of donors, NAD or NADP as acceptor,coenzyme binding,oxidation-reduction process
ribosomal protein L5 B	Phvul.010G117700.1	structural constituent of ribosome,intracellular,ribosome,translation,5S rRNA binding
purple acid phosphatase 29	Phvul.010G121500.1	hydrolase activity
4Unknowns ribosomal protein SA B	Phvul.010G125100.1	structural constituent of ribosome,intracellular,ribosome,translation,small ribosomal subunit
Subtilase family protein	Phvul.010G128600.1	serine-type endopeptidase activity,proteolysis,identical protein binding,negative regulation of catalytic activity
germin 3	Phvul.010G129600.1	manganese ion binding,nutrient reservoir activity
germin-like protein 1	Phvul.010G129900.1	manganese ion binding,nutrient reservoir activity
GDSL-like Lipase/Acylhydrolase superfamily protein	Phvul.010G143600.1	lipid metabolic process,hydrolase activity, acting on ester bonds
HAD superfamily, subfamily IIIB acid phosphatase	Phvul.010G144300.1	acid phosphatase activity,nutrient reservoir activity
Isochorismatase family protein	Phvul.010G147700.1	catalytic activity,metabolic process
photosystem I subunit H2	Phvul.010G148800.1	photosystem I,photosystem I reaction center,photosynthesis
Rubredoxin-like superfamily protein	Phvul.010G153300.1	cytochrome-c oxidase activity,mitochondrial envelope
Aconitase/3-isopropylmalate dehydratase protein	Phvul.010G153800.1	3-isopropylmalate dehydratase activity,metabolic process,leucine biosynthetic process,3-isopropylmalate dehydratase complex
methyl-CPG-binding domain 1Unknown	Phvul.010G155700.1	DNA binding,nucleus
Ribosomal protein L7Ae/L3Unknowne/S12e/Gadd45 family protein	Phvul.010G160500.1	structural constituent of ribosome,intracellular,ribosome,translation
Ribosomal protein L1p/L1Unknowne family	Phvul.011G011500.1	RNA binding,structural constituent of ribosome,translation,large ribosomal subunit
chloroplast signal recognition particle component (CAO)	Phvul.011G025300.1	protein binding
rotamase CYP 3	Phvul.011G026900.1	peptidyl-prolyl cis-trans isomerase activity,protein folding
ribosomal protein L12-C	Phvul.011G027700.1	structural constituent of ribosome,intracellular,ribosome,translation
glycine-rich protein 2B	Phvul.011G033900.1	nucleic acid binding,DNA binding,regulation of transcription, DNA-dependent,zinc ion binding
fructose-bisphosphate aldolase 2	Phvul.011G039100.1	catalytic activity,fructose-bisphosphate aldolase activity,glycolysis
cold, circadian rhythm, and rna binding 2	Phvul.011G045000.1	nucleotide binding,nucleic acid binding
RAB GTPase homolog G3F	Phvul.011G046100.1	GTPase activity,GTP binding,intracellular,GTP catabolic process,intracellular protein transport,nucleocytoplasmic transport,signal transduction,small GTPase mediated signal transduction,protein transport
homolog of carrot EP3-3 chitinase	Phvul.011G051500.1	chitinase activity,chitin catabolic process,cell wall macromolecule catabolic process
FKBP-like peptidyl-prolyl cis-trans isomerase family protein	Phvul.011G051700.1	protein folding
lipoxygenase 2	Phvul.011G056500.1	iron ion binding,protein binding,lipoxygenase activity,oxidoreductase activity, acting on single donors with incorporation of molecular oxygen, incorporation of two atoms of oxygen,metal ion binding,oxidation-reduction process
RAB GTPase homolog A2B	Phvul.011G061100.1	GTPase activity,GTP binding,intracellular,GTP catabolic process,intracellular protein transport,nucleocytoplasmic transport,signal transduction,small GTPase mediated signal transduction,protein transport
Histone superfamily protein	Phvul.011G066500.1	nucleosome,DNA binding,nucleus,nucleosome assembly,protein heterodimerization activity
Ras-related small GTP-binding family protein	Phvul.011G066700.1	GTPase activity,GTP binding,intracellular,GTP catabolic process,intracellular protein transport,nucleocytoplasmic transport,signal transduction,small GTPase mediated signal transduction,protein transport
ribosomal protein L23AB	Phvul.011G067600.1	nucleotide binding,structural constituent of ribosome,intracellular,ribosome,translation
ascorbate peroxidase 1	Phvul.011G071300.1	peroxidase activity,response to oxidative stress,heme binding,oxidation-reduction process
Glycosyl hydrolase superfamily protein	Phvul.011G077900.1	hydrolase activity, hydrolyzing O-glycosyl compounds,carbohydrate metabolic process
Ribosomal protein L11 family protein	Phvul.011G079400.1	structural constituent of ribosome,ribosome,translation
chaperonin-6Unknownalpha	Phvul.011G082600.1	ATP binding,cytoplasm,protein folding,protein refolding,cellular protein metabolic process
lactoylglutathione lyase family protein / glyoxalase I family protein	Phvul.011G084400.1	lactoylglutathione lyase activity,metal ion binding
copper/zinc superoxide dismutase 2	Phvul.011G086300.1	superoxide dismutase activity,superoxide metabolic process,metal ion binding,oxidation-reduction process
ribosomal protein L9	Phvul.011G086500.1	structural constituent of ribosome,intracellular,ribosome,translation
ribulose-bisphosphate carboxylases	Phvul.011G089000.1	magnesium ion binding
protein tyrosine phosphatases;protein tyrosine phosphatases	Phvul.011G091000.1	protein tyrosine phosphatase activity,protein dephosphorylation
beta-amylase 5	Phvul.011G107700.1	polysaccharide catabolic process,carbohydrate metabolic process,beta-amylase activity
lumazine-binding family protein	Phvul.011G114100.1	riboflavin synthase activity,riboflavin biosynthetic process
ketol-acid reductoisomerase	Phvul.011G134200.1	ketol-acid reductoisomerase activity,cellular amino acid biosynthetic process,branched-chain amino acid biosynthetic process,oxidoreductase activity,oxidoreductase activity, acting on the CH-OH group of donors, NAD or NADP as acceptor,coenzyme binding,oxidation-reduction process
Cyclophilin-like peptidyl-prolyl cis-trans isomerase family protein	Phvul.011G148100.1	peptidyl-prolyl cis-trans isomerase activity,protein folding
thioredoxin M-type 4	Phvul.011G157700.1	glycerol ether metabolic process,protein disulfide oxidoreductase activity,cell redox homeostasis
Lactate/malate dehydrogenase family protein	Phvul.011G159000.1	catalytic activity,carbohydrate metabolic process,malate metabolic process,oxidoreductase activity,malate dehydrogenase activity,oxidoreductase activity, acting on the CH-OH group of donors, NAD or NADP as acceptor,L-malate dehydrogenase activity,oxidation-reduction process
chitinase A	Phvul.011G167300.1	hydrolase activity, hydrolyzing O-glycosyl compounds,carbohydrate metabolic process
kunitz trypsin inhibitor 1	Phvul.011G169800.1	endopeptidase inhibitor activity
Kunitz family trypsin and protease inhibitor protein	Phvul.011G169900.1	endopeptidase inhibitor activity
Glycosyl hydrolase superfamily protein	Phvul.011G177000.1	hydrolase activity, hydrolyzing O-glycosyl compounds,carbohydrate metabolic process
metacaspase 5	Phvul.011G180300.1	cysteine-type endopeptidase activity,proteolysis
Eukaryotic aspartyl protease family protein	Phvul.011G206100.1	aspartic-type endopeptidase activity,proteolysis
	Phvul.L002800.1	isopentenyl-diphosphate delta-isomerase activity,isoprenoid biosynthetic process,hydrolase activity

## Sheet: Supplementary Table S4
Supplementary Table 4. Output of gene set enrichment analysis as performed by Pathway Studio software.
Pathway	Number of Entities	Number of Measured Entities	Percent Coverage	A195 p-value	Sacramento p-value
anchored to membrane	250	38	0.152	0.00530471	0.00942533
anther development	65	6	0.0923077	0.0426414	0.0574956
apoplast	680	74	0.108824	0.0730564	0.0119224
aromatic amino acid family biosynthetic process	100	9	0.09	0.041872	0.0333019
ATP binding	6003	81	0.0134933	0.0123393	3.79846e-05
ATP synthesis coupled proton transport	73	5	0.0684932	0.00417874	0.0136675
ATPase activity	324	22	0.0679012	0.000268306	2.30144e-07
brassinosteroid biosynthetic process	120	6	0.05	0.0252471	0.224063
carbohydrate metabolic process	917	19	0.0207197	0.0111263	0.248185
chloroplast photosystem II	17	7	0.411765	0.0479668	0.644198
chloroplast thylakoid membrane	518	84	0.162162	0.000621045	0.263915
cobalt ion binding	56	5	0.0892857	0.0162449	0.319231
cuticle development	47	6	0.12766	0.0130788	0.0676063
cysteine biosynthetic process	212	43	0.20283	0.00309832	0.0376286
cysteine-type endopeptidase activity	130	10	0.0769231	0.0240232	0.134424
cysteine-type peptidase activity	176	15	0.0852273	0.0240687	0.534307
cytosolic ribosome	226	14	0.0619469	0.0634273	0.0369882
defense response	934	11	0.0117773	0.262331	0.00996689
defense response to bacterium	415	43	0.103614	4.17263e-06	9.59818e-05
defense response to fungus	618	23	0.0372168	0.00105819	0.00596053
defense response, incompatible interaction	85	21	0.247059	6.90497e-05	0.000567036
detection of biotic stimulus	102	17	0.166667	0.00187578	0.00803695
extracellular matrix	38	5	0.131579	0.0286363	0.065161
extracellular region	2888	137	0.0474377	0.110762	5.68514e-06
fatty acid biosynthetic process	272	6	0.0220588	0.0139515	0.226453
glycolysis	364	48	0.131868	0.0411344	0.137296
Golgi apparatus	1204	63	0.0523256	0.0181517	0.866052
innate immune response	179	5	0.027933	0.0400015	0.134307
jasmonic acid mediated signaling pathway	286	22	0.0769231	0.000677387	0.00173113
lipid binding	195	43	0.220513	0.000663107	4.53693e-19
lipid transport	378	52	0.137566	5.04617e-05	2.25041e-23
MAPK cascade	223	22	0.0986547	0.000677387	0.00173113
NAD binding	170	7	0.0411765	0.207025	0.0336178
negative regulation of defense response	270	22	0.0814815	0.000677387	0.00173113
nucleoside-triphosphatase activity	310	12	0.0387097	0.00866694	2.80527e-05
nucleosome	142	6	0.0422535	0.00910701	0.999087
nucleosome assembly	162	7	0.0432099	0.028589	0.998711
peroxidase activity	370	15	0.0405405	0.929332	0.0327998
phosphoglycerate kinase activity	13	5	0.384615	0.00108856	0.0241933
photosynthesis, light reaction	151	40	0.264901	0.0012368	0.00314254
photosynthetic electron transport in photosystem I	50	21	0.42	0.0290093	0.0238065
photosystem I reaction center	21	5	0.238095	0.00400293	0.36132
photosystem II assembly	154	28	0.181818	0.00155169	0.00600049
plant-type cell wall	314	16	0.0509554	0.144983	0.0292531
plant-type cell wall biogenesis	105	5	0.047619	0.0220834	0.132272
plastid organization	85	23	0.270588	0.000307983	0.000971032
plastoglobule	74	18	0.243243	0.00259055	0.49848
poly(U) RNA binding	22	9	0.409091	0.00131725	0.0435436
protein disulfide oxidoreductase activity	260	22	0.0846154	0.338235	0.039942
protein targeting to chloroplast	53	7	0.132075	0.0114613	0.0682909
protein targeting to membrane	365	23	0.0630137	0.000573048	0.000719468
proteolysis	1149	63	0.0548303	0.809496	0.0415549
reductive pentose-phosphate cycle	28	10	0.357143	3.77055e-05	0.021424
regulation of hydrogen peroxide metabolic process	187	22	0.117647	0.000971367	0.00950165
regulation of multi-organism process	91	17	0.186813	0.00187578	0.00803695
regulation of plant-type hypersensitive response	367	23	0.0626703	0.000573048	0.000719468
regulation of protein dephosphorylation	136	19	0.139706	0.0158368	0.0697627
regulation of proton transport	81	14	0.17284	0.0193151	0.092527
response to bacterium	186	9	0.0483871	0.0378302	0.00294654
response to blue light	113	25	0.221239	0.00643099	0.13063
response to chitin	423	18	0.0425532	0.00448699	0.0153124
response to cold	453	52	0.11479	0.000496304	0.00301755
response to far red light	108	26	0.240741	0.0146726	0.196615
response to glucose stimulus	80	5	0.0625	0.00315616	0.0166322
response to light stimulus	239	16	0.0669456	0.0878212	0.027905
response to red light	109	26	0.238532	0.0146726	0.196615
response to sucrose stimulus	207	18	0.0869565	0.0172291	0.0640297
salicylic acid biosynthetic process	211	26	0.123223	0.000512836	0.00136228
signal transduction	538	8	0.0148699	4.94989e-05	5.83775e-05
stromule	47	17	0.361702	0.00603652	0.0628426
systemic acquired resistance, salicylic acid mediated signaling pathway	255	23	0.0901961	0.000872355	0.00473628
thylakoid	218	77	0.353211	0.0101348	0.221785
very long-chain fatty acid metabolic process	45	5	0.111111	0.0329815	0.165599

## Sheet: Supplementary Table S5
Supplementary Table 5. Relative quantitation by Spectral Counting AND average MS2 TIC
			Spectral Count	Total Spectral Count (0.1 added to 0 values)											Average MS2 TIC	Average MS2 TIC (100 added to 0 values)
Protein	Accession Number	Molecular Weight	T-Test (P-Value)	A195_1	A195_2	A195_3	Sac_1	Sac_2	Sac_3	Fold Change A195/Sac		Protein	Accession Number	Molecular Weight	T-Test (P-Value)	A195_1	A195_2	A195_3	Sac_1	Sac_2	Sac_3	Fold Change A195/Sac
light-harvesting chlorophyll B-binding protein 3	Phvul.005G085800.1|PACid:27148435	29 kDa	< 0.00010	6	6	7	0.1	0.1	0.1	63.3333		Unknown	Phvul.003G074600.1|PACid:27143731	31 kDa	0.0001	100	100	100	15949	13373	15831	0.00664408
light harvesting complex photosystem II subunit 6	Phvul.006G207300.1|PACid:27166485	27 kDa	< 0.00010	5	5	6	0.1	0.1	0.1	53.3333		Peroxidase superfamily protein	Phvul.007G082600.1|PACid:27161387	38 kDa	0.00015	100	100	100	9501.4	7773	7705.7	0.0120096
Unknown	Phvul.003G074600.1|PACid:27143731	31 kDa	0.00048	0.1	0.1	0.1	6	7	5	0.0166667		light-harvesting chlorophyll B-binding protein 3	Phvul.005G085800.1|PACid:27148435	29 kDa	0.00087	20893	18740	14130	100	100	100	179.21
Peroxidase superfamily protein	Phvul.007G082600.1|PACid:27161387	38 kDa	0.0023	0.1	0.1	0.1	4	3	5	0.025		light harvesting complex photosystem II subunit 6	Phvul.006G207300.1|PACid:27166485	27 kDa	0.0031	13710	11086	18824	100	100	100	145.4
Embryo-specific protein 3, (ATS3)	Phvul.005G177100.1|PACid:27149941	20 kDa	0.0023	0.1	0.1	0.1	5	3	4	0.025		light harvesting complex photosystem II subunit 6	Phvul.002G207500.1|PACid:27170403	28 kDa	0.0032	10284	6180.9	7187.9	100	100	100	78.8427
CP12 domain-containing protein 2	Phvul.001G212900.1|PACid:27164757	14 kDa	0.0072	11	10	12	18	16	15	0.673469		allantoinase	Phvul.006G186800.1|PACid:27164938	57 kDa	0.0039	100	100	100	9160.5	9537.4	14876	0.00893551
Ribosomal L5P family protein	Phvul.008G059200.1|PACid:27153603	29 kDa	0.022	9	6	10	13	16	13	0.595238		Embryo-specific protein 3, (ATS3)	Phvul.005G177100.1|PACid:27149941	20 kDa	0.0048	100	100	100	11616	15180	8114.8	0.00859333
light harvesting complex photosystem II subunit 6	Phvul.002G207500.1|PACid:27170403	28 kDa	0.026	4	2	6	0.1	0.1	0.1	40		elongation factor Ts family protein	Phvul.004G168100.1|PACid:27157476	122 kDa	0.0095	10424	11430	9216.5	6031.1	7489.3	5684.3	1.61786
allantoinase	Phvul.006G186800.1|PACid:27164938	57 kDa	0.045	0.1	0.1	0.1	10	5	3	0.0166667		FKBP-like peptidyl-prolyl cis-trans isomerase family protein	Phvul.011G051700.1|PACid:27151439	29 kDa	0.01	100	15998	100	44101	34135	30147	0.149451
RNA-binding (RRM/RBD/RNP motifs) family protein	Phvul.005G039000.1|PACid:27150205	26 kDa	0.053	14	12	15	23	20	16	0.694915		metacaspase 5	Phvul.011G180300.1|PACid:27150868	45 kDa	0.015	16308	18387	17360	31460	48081	34886	0.454919
FASCICLIN-like arabinogalactan-protein 1Unknown	Phvul.008G075000.1|PACid:27155369	43 kDa	0.079	4	0.1	0.1	8	3	8	0.221053		Oxidoreductase, zinc-binding dehydrogenase family protein	Phvul.003G060300.1|PACid:27143379	41 kDa	0.018	18467	21214	20817	25190	23050	24741	0.828955
Ribosomal protein S19e family protein	Phvul.005G018600.1|PACid:27149117 (+1)	16 kDa	0.089	4	0.1	0.1	4	4	6	0.3		Ribosomal L5P family protein	Phvul.008G059200.1|PACid:27153603	29 kDa	0.033	16423	17868	17807	19577	24905	23735	0.76371
plastid ribosomal protein l11	Phvul.004G090600.1|PACid:27158071	23 kDa	0.0011	2	2	0.1	11	9	12	0.128125		thioredoxin M-type 4	Phvul.005G071200.1|PACid:27149735	20 kDa	0.043	16634	16549	14910	18341	20367	23520	0.772851
uridylyltransferase-related	Phvul.005G181700.1|PACid:27149150	30 kDa	0.0052	16	21	17	9	10	9	1.92857		protochlorophyllide oxidoreductase A	Phvul.005G083700.1|PACid:27149633 (+1)	43 kDa	0.048	9002.4	6800.3	10130	11986	11555	15217	0.669093
2Fe-2S ferredoxin-like superfamily protein	Phvul.002G045400.1|PACid:27168785	16 kDa	0.017	5	3	5	16	14	9	0.333333		photosystem II subunit R	Phvul.005G055200.1|PACid:27148459	14 kDa	0.052	15517	23846	18494	26849	26822	24866	0.736685
plastid transcriptionally active 16	Phvul.011G061600.1|PACid:27152979	55 kDa	0.019	11	16	10	0.1	6	0.1	5.96774		CP12 domain-containing protein 2	Phvul.001G212900.1|PACid:27164757	14 kDa	0.053	10073.8	13358	12084	16215	13831	17897	0.740792
cold, circadian rhythm, and rna binding 2	Phvul.009G023700.1|PACid:27146551	18 kDa	0.027	5	8	5	12	9	13	0.529412		copper/zinc superoxide dismutase 1	Phvul.006G097000.1|PACid:27167484	15 kDa	0.055	17453	14377	14418	17529	18941	18730	0.837826
DnaJ/Hsp4Unknown cysteine-rich domain superfamily protein	Phvul.003G164500.1|PACid:27144762	14 kDa	0.03	5	0.1	5	14	8	12	0.297059		Ribosomal protein S19e family protein	Phvul.005G018600.1|PACid:27149117 (+1)	16 kDa	0.06	16094	100	100	29381	37972	15298	0.197142
copper ion binding;cobalt ion binding;zinc ion binding	Phvul.002G265700.1|PACid:27169903	28 kDa	0.035	7	7	9	5	5	6	1.4375		FASCICLIN-like arabinogalactan-protein 1Unknown	Phvul.008G075000.1|PACid:27155369	43 kDa	0.061	14469	100	100	27486	14244	20428	0.235995
FASCICLIN-like arabinogalactan 2	Phvul.008G288800.1|PACid:27153618	43 kDa	0.036	6	6	12	16	13	18	0.510638		peroxiredoxin IIF	Phvul.006G151800.1|PACid:27166483	21 kDa	0.063	10455	13430	13890	23193	17197	16121	0.668454
2-cysteine peroxiredoxin B	Phvul.001G194100.1|PACid:27163227 (+1)	29 kDa	0.038	34	29	26	13	23	19	1.61818		glycine decarboxylase P-protein 2	Phvul.001G035500.1|PACid:27163200	115 kDa	0.069	21597	20397	19435	14167	17055	18935	1.22473
GDSL-like Lipase/Acylhydrolase superfamily protein	Phvul.006G169100.1|PACid:27166530	40 kDa	0.045	0.1	8	0.1	14	9	19	0.195238		DPP6 N-terminal domain-like protein	Phvul.009G128300.1|PACid:27146137	76 kDa	0.072	10656	10773	7289	11469	13769	15770	0.700302
ATP synthase delta-subunit gene	Phvul.003G211100.1|PACid:27143051	27 kDa	0.049	21	30	20	5	16	12	2.15152		photosystem I light harvesting complex gene 1	Phvul.004G071500.1|PACid:27156956	26 kDa	0.078	28424	24858	34844	100	25253	100	3.4623
actin-11	Phvul.004G001000.1|PACid:27156550	42 kDa	0.05	11	6	8	4	3	5	2.08333		GTP binding Elongation factor Tu family protein	Phvul.004G075100.1|PACid:27158020	49 kDa	0.088	23545	23631	15399	35450	37752	23801	0.645083
FKBP-like peptidyl-prolyl cis-trans isomerase family protein	Phvul.008G009400.1|PACid:27154683	30 kDa	0.052	0.1	6	3	9	8	7	0.379167		RNA-binding (RRM/RBD/RNP motifs) family protein	Phvul.005G039000.1|PACid:27150205	26 kDa	0.089	10324	12779	12491	9378.7	8617.2	10831	1.23475
Transketolase	Phvul.007G006600.1|PACid:27159083	80 kDa	0.054	32	40	24	15	23	14	1.84615		plastid transcriptionally active 16	Phvul.011G061600.1|PACid:27152979	55 kDa	0.11	14650	14001	13118	100	13500	100	3.04883
FASCICLIN-like arabinogalactan 1	Phvul.006G057400.1|PACid:27165543	44 kDa	0.06	0.1	0.1	3	5	4	3	0.266667		Glycosyl hydrolase superfamily protein	Phvul.009G256400.1|PACid:27145669 (+1)	41 kDa	0.11	20655	11930	23562	100	100	16117	3.44101
germin 3	Phvul.009G227800.1|PACid:27146968	22 kDa	0.06	16	16	16	17	22	22	0.786885		basic chitinase	Phvul.009G116600.1|PACid:27147911	35 kDa	0.11	18773	26009	20423	100	100	20462	3.15579
poly(A) binding protein 2	Phvul.003G047500.1|PACid:27144812	70 kDa	0.062	6	7	10	17	11	12	0.575		NAD(P)-binding Rossmann-fold superfamily protein	Phvul.010G011300.1|PACid:27140467	28 kDa	0.11	25432	25722	15073	27015	32413	30923	0.732997
2UnknownS proteasome alpha subunit E2	Phvul.007G021000.1|PACid:27159393	26 kDa	0.072	10	6	11	0.1	6	4	2.67327		beta-1,3-glucanase 1	Phvul.001G128500.1|PACid:27163215	37 kDa	0.12	18264	100	23666	100	100	100	140.1
Ribosomal protein S5/Elongation factor G/III/V family protein	Phvul.005G058100.1|PACid:27149231 (+1)	94 kDa	0.083	14	10	12	9	10	7	1.38462		Cytochrome c	Phvul.002G098700.1|PACid:27171338	19 kDa	0.12	100	100	100	9933.9	9463.6	100	0.0153866
glutamine synthetase 2	Phvul.006G155800.1|PACid:27167409 (+1)	47 kDa	0.083	15	25	18	7	14	12	1.75758		NADP-malic enzyme 3	Phvul.002G309600.1|PACid:27169865	72 kDa	0.12	100	100	100	16510	100	17731	0.00873591
early nodulin-like protein 1	Phvul.005G073200.1|PACid:27149914	46 kDa	0.091	3	3	4	0.1	0.1	3	3.125		S-adenosyl-L-homocysteine hydrolase	Phvul.003G051200.1|PACid:27144134	53 kDa	0.12	18242	100	14489	100	100	100	109.437
lipid transfer protein 4	Phvul.008G087000.1|PACid:27153492	12 kDa	0.094	6	6	8	16	9	10	0.571429		cold shock domain protein 1	Phvul.003G263300.1|PACid:27144039	24 kDa	0.12	100	100	100	11641	100	9021.6	0.0144491
cyclophilin 38	Phvul.004G017000.1|PACid:27158411	49 kDa	0.094	11	17	14	10	9	11	1.4		phosphatase-related	Phvul.004G104600.1|PACid:27156862 (+1)	41 kDa	0.12	15204	100	14789	100	100	100	100.31
chlorophyll A/B binding protein 1	Phvul.004G091600.1|PACid:27157179 (+1)	28 kDa	0.099	20	18	12	10	12	12	1.47059		NAD(P)-linked oxidoreductase superfamily protein	Phvul.006G028400.1|PACid:27166311	41 kDa	0.12	100	100	100	11681	11634	100	0.0128123
cold, circadian rhythm, and rna binding 2	Phvul.011G045000.1|PACid:27151288	17 kDa	0.1	12	9	11	22	17	12	0.627451		Ribosomal protein S11 family protein	Phvul.006G095400.1|PACid:27167311 (+2)	16 kDa	0.12	15433	100	14096	100	100	100	98.7633
ascorbate peroxidase 4	Phvul.008G176700.1|PACid:27156217	38 kDa	0.1	10	18	14	0.1	8	10	2.32044		Li-tolerant lipase 1	Phvul.006G107100.1|PACid:27166559	41 kDa	0.12	100	100	100	100	24099	30370	0.00549763
chaperonin-6Unknownalpha	Phvul.011G082600.1|PACid:27152566	62 kDa	0.1	52	43	39	19	41	26	1.55814		ribosomal protein S1	Phvul.006G121100.1|PACid:27166308	44 kDa	0.12	100	100	100	100	13033	11471	0.0121931
FKBP-like peptidyl-prolyl cis-trans isomerase family protein	Phvul.011G051700.1|PACid:27151439	29 kDa	0.16	0.1	4	0.1	3	4	4	0.381818		phosphoglucomutase	Phvul.007G064900.1|PACid:27160641	68 kDa	0.12	16096	100	14763	100	100	100	103.197
photosystem I light harvesting complex gene 1	Phvul.004G071500.1|PACid:27156956	26 kDa	0.16	3	4	2	0.1	3	0.1	2.8125		adenosine kinase 2	Phvul.007G150300.1|PACid:27160112	37 kDa	0.12	13788	100	16563	100	100	100	101.503
peroxiredoxin IIF	Phvul.006G151800.1|PACid:27166483	21 kDa	0.2	9	11	13	8	9	10	1.22222		seryl-tRNA synthetase / serine--tRNA ligase	Phvul.007G180500.1|PACid:27159615 (+1)	51 kDa	0.12	8705.6	7882.8	100	100	100	100	55.628
elongation factor Ts family protein	Phvul.004G168100.1|PACid:27157476	122 kDa	0.25	9	8	9	9	16	10	0.742857		heat shock cognate protein 7Unknown-1	Phvul.008G013000.1|PACid:27155656	71 kDa	0.12	14527	100	13434	100	100	100	93.5367
GTP binding Elongation factor Tu family protein	Phvul.004G075100.1|PACid:27158020	49 kDa	0.25	4	2	2	4	3	4	0.727273		ornithine carbamoyltransferase	Phvul.009G059600.1|PACid:27147348	40 kDa	0.12	100	12414	16555	100	100	100	96.8967
protochlorophyllide oxidoreductase A	Phvul.005G083700.1|PACid:27149633 (+1)	43 kDa	0.35	5	4	5	2	4	5	1.27273		KH domain-containing protein	Phvul.009G076800.1|PACid:27145260	66 kDa	0.12	100	100	100	100	13496	12856	0.0113413
DPP6 N-terminal domain-like protein	Phvul.009G128300.1|PACid:27146137	76 kDa	0.35	5	6	3	4	3	4	1.27273		photosystem I subunit K	Phvul.009G216400.1|PACid:27147271	13 kDa	0.12	28609	32375	100	100	100	100	203.613
photosystem II subunit R	Phvul.005G055200.1|PACid:27148459	14 kDa	0.46	13	17	16	24	15	15	0.851852		light harvesting complex photosystem II	Phvul.010G002100.1|PACid:27140216	31 kDa	0.12	24219	30739	100	100	100	100	183.527
thioredoxin M-type 4	Phvul.005G071200.1|PACid:27149735	20 kDa	0.64	10	13	11	13	15	9	0.918919		Protein prenylyltransferase superfamily protein	Phvul.002G187000.1|PACid:27170414	32 kDa	0.12	10832	100	12693	100	100	100	78.75
Oxidoreductase, zinc-binding dehydrogenase family protein	Phvul.003G060300.1|PACid:27143379	41 kDa	0.67	27	29	30	28	30	26	1.02381		FK5Unknown6-binding protein 13	Phvul.002G187500.1|PACid:27167853	23 kDa	0.12	100	100	100	19179	100	15862	0.00853704
copper/zinc superoxide dismutase 1	Phvul.006G097000.1|PACid:27167484	15 kDa	0.67	12	8	18	14	12	7	1.15152		DNAJ heat shock family protein	Phvul.002G257300.1|PACid:27170908 (+1)	47 kDa	0.12	100	100	100	14908	17238	100	0.00930348
glycine decarboxylase P-protein 2	Phvul.001G035500.1|PACid:27163200	115 kDa	0.71	11	27	9	15	28	13	0.839286		reversibly glycosylated polypeptide 3	Phvul.003G040000.1|PACid:27142537	50 kDa	0.12	22889	100	19801	100	100	100	142.633
metacaspase 5	Phvul.011G180300.1|PACid:27150868	45 kDa	0.75	5	6	7	8	3	9	0.9		2-oxoacid dehydrogenases acyltransferase family protein	Phvul.007G026300.1|PACid:27161528	48 kDa	0.12	100	12887	14703	100	100	100	92.3
RNA-binding (RRM/RBD/RNP motifs) family protein	Phvul.007G130600.1|PACid:27159662 (+1)	48 kDa	0.11	0.1	0.1	5	4	6	6	0.325		lactate/malate dehydrogenase family protein	Phvul.007G140600.1|PACid:27158684	48 kDa	0.12	19353	25301	100	100	100	100	149.18
chloroplast heat shock protein 7Unknown-2	Phvul.006G219600.1|PACid:27166564	74 kDa	0.11	40	52	47	29	43	34	1.31132		ADP glucose pyrophosphorylase 1	Phvul.008G284000.1|PACid:27154630	56 kDa	0.12	13066	10936	100	100	100	100	80.34
Glycosyl hydrolase superfamily protein	Phvul.009G256400.1|PACid:27145669 (+1)	41 kDa	0.12	30	16	31	0.1	0.1	23	3.31897		ribosomal protein L5 B	Phvul.010G117700.1|PACid:27141214	34 kDa	0.12	11877	100	12762	100	100	100	82.4633
beta-1,3-glucanase 1	Phvul.001G128500.1|PACid:27163215	37 kDa	0.12	6	0.1	6	0.1	0.1	0.1	40.3333		Ras-related small GTP-binding family protein	Phvul.011G066700.1|PACid:27151583	24 kDa	0.12	17247	100	12919	100	100	100	100.887
Cytochrome c	Phvul.002G098700.1|PACid:27171338	19 kDa	0.12	0.1	0.1	0.1	4	5	0.1	0.032967		GroES-like family protein	Phvul.002G095400.1|PACid:27171245	11 kDa	0.12	100	100	100	33704	31066	100	0.00462463
NADP-malic enzyme 3	Phvul.002G309600.1|PACid:27169865	72 kDa	0.12	0.1	0.1	0.1	6	0.1	6	0.0247934		germin 3	Phvul.010G129600.1|PACid:27140606	22 kDa	0.12	100	100	100	17157	18160	100	0.00847051
S-adenosyl-L-homocysteine hydrolase	Phvul.003G051200.1|PACid:27144134	53 kDa	0.12	9	0.1	7	0.1	0.1	0.1	53.6667		MD-2-related lipid recognition domain-containing protein	Phvul.011G100100.1|PACid:27151261	17 kDa	0.12	100	100	100	14033	16083	100	0.00992851
cold shock domain protein 1	Phvul.003G263300.1|PACid:27144039	24 kDa	0.12	0.1	0.1	0.1	6	0.1	5	0.027027		Photosystem II 5 kD protein	Phvul.011G009700.1|PACid:27152166	11 kDa	0.12	100	34560	34660	100	100	100	231.067
phosphatase-related	Phvul.004G104600.1|PACid:27156862 (+1)	41 kDa	0.12	7	0.1	6	0.1	0.1	0.1	43.6667		Nucleic acid-binding, OB-fold-like protein	Phvul.001G199400.1|PACid:27163065 (+1)	8 kDa	0.12	100	100	100	100	24941	20313	0.00661463
NAD(P)-linked oxidoreductase superfamily protein	Phvul.006G028400.1|PACid:27166311	41 kDa	0.12	0.1	0.1	0.1	3	4	0.1	0.0422535		DC1 domain-containing protein	Phvul.003G061100.1|PACid:27143600	64 kDa	0.12	10821	100	11919	100	100	100	76.1333
Ribosomal protein S11 family protein	Phvul.006G095400.1|PACid:27167311 (+2)	16 kDa	0.12	3	0.1	3	0.1	0.1	0.1	20.3333		vacuolar membrane ATPase 1Unknown	Phvul.007G220600.1|PACid:27161482	12 kDa	0.12	100	100	100	16083	14696	100	0.00971534
Li-tolerant lipase 1	Phvul.006G107100.1|PACid:27166559	41 kDa	0.12	0.1	0.1	0.1	0.1	5	5	0.029703		allene oxide cyclase 4	Phvul.008G020200.1|PACid:27155432	27 kDa	0.12	100	100	100	17083	100	19849	0.0081011
ribosomal protein S1	Phvul.006G121100.1|PACid:27166308	44 kDa	0.12	0.1	0.1	0.1	0.1	7	8	0.0198675		photosystem II light harvesting complex gene 2.1	Phvul.008G285100.1|PACid:27154358	29 kDa	0.12	25033	100	23698	100	100	100	162.77
phosphoglucomutase	Phvul.007G064900.1|PACid:27160641	68 kDa	0.12	2	0.1	2	0.1	0.1	0.1	13.6667		ribosomal protein S13A	Phvul.010G082900.1|PACid:27140954	17 kDa	0.12	18433	100	18980	100	100	100	125.043
adenosine kinase 2	Phvul.007G150300.1|PACid:27160112	37 kDa	0.12	3	0.1	4	0.1	0.1	0.1	23.6667		photosystem II family protein	Phvul.005G105900.1|PACid:27148554	18 kDa	0.12	29406	23897	25192	23928	22274	18037	1.22192
seryl-tRNA synthetase / serine--tRNA ligase	Phvul.007G180500.1|PACid:27159615 (+1)	51 kDa	0.12	3	4	0.1	0.1	0.1	0.1	23.6667		Subtilisin-like serine endopeptidase family protein	Phvul.008G229500.1|PACid:27155948	76 kDa	0.12	16064	30001	19956	31403	27648	40090	0.66593
heat shock cognate protein 7Unknown-1	Phvul.008G013000.1|PACid:27155656	71 kDa	0.12	18	0.1	17	0.1	0.1	0.1	117		D-ribulose-5-phosphate-3-epimerase	Phvul.003G188800.1|PACid:27143201	30 kDa	0.12	20338	22324	17265	11424	16127	18039	1.31448
ornithine carbamoyltransferase	Phvul.009G059600.1|PACid:27147348	40 kDa	0.12	0.1	3	3	0.1	0.1	0.1	20.3333		lactoylglutathione lyase family protein / glyoxalase I family protein	Phvul.011G084400.1|PACid:27151118	26 kDa	0.12	17636	100	23127	36460	38803	19516	0.43114
KH domain-containing protein	Phvul.009G076800.1|PACid:27145260	66 kDa	0.12	0.1	0.1	0.1	0.1	8	9	0.0175439		plastid ribosomal protein l11	Phvul.004G090600.1|PACid:27158071	23 kDa	0.13	19729	15893	100	27185	20904	22890	0.503276
photosystem I subunit K	Phvul.009G216400.1|PACid:27147271	13 kDa	0.12	3	4	0.1	0.1	0.1	0.1	23.6667		isopropyl malate isomerase large subunit 1	Phvul.007G232000.1|PACid:27159414	55 kDa	0.13	15371	100	22020	100	100	100	124.97
light harvesting complex photosystem II	Phvul.010G002100.1|PACid:27140216	31 kDa	0.12	3	3	0.1	0.1	0.1	0.1	20.3333		Ribosomal protein L7Ae/L3Unknowne/S12e/Gadd45 family protein	Phvul.010G160500.1|PACid:27140145	15 kDa	0.13	28983	100	41806	100	100	100	236.297
isopropyl malate isomerase large subunit 1	Phvul.007G232000.1|PACid:27159414	55 kDa	0.12	3	0.1	3	0.1	0.1	0.1	20.3333		Ribosomal protein S1Unknownp/S2Unknowne family protein	Phvul.006G055300.1|PACid:27164994	22 kDa	0.13	100	100	100	100	29925	19779	0.00602361
Ribosomal protein L7Ae/L3Unknowne/S12e/Gadd45 family protein	Phvul.010G160500.1|PACid:27140145	15 kDa	0.12	3	0.1	4	0.1	0.1	0.1	23.6667		actin-11	Phvul.008G011000.1|PACid:27155877	42 kDa	0.13	13344	100	8750.2	100	100	100	73.9807
Transketolase	Phvul.003G037400.1|PACid:27144133	79 kDa	0.12	8	0.1	7	0.1	0.1	0.1	50.3333		protein tyrosine phosphatases;protein tyrosine phosphatases	Phvul.011G091000.1|PACid:27152953	30 kDa	0.13	100	100	100	100	26873	19422	0.00646621
pfkB-like carbohydrate kinase family protein	Phvul.005G153300.1|PACid:27150378	35 kDa	0.12	3	3	7	0.1	0.1	3	4.0625		Inositol monophosphatase family protein	Phvul.006G142400.1|PACid:27165516 (+1)	33 kDa	0.13	9526.3	100	14499	100	100	100	80.4177
glyoxalase II 3	Phvul.005G062700.1|PACid:27150501	32 kDa	0.12	0.1	4	3	0.1	0.1	0.1	23.6667		Transcriptional coactivator/pterin dehydratase	Phvul.007G240500.1|PACid:27160038	24 kDa	0.13	11677	100	12717	16768	19347	13635	0.492342
heat shock factor binding protein	Phvul.007G106500.1|PACid:27160354	10 kDa	0.12	0.1	0.1	4	4	4	4	0.35		tubulin alpha-2 chain	Phvul.002G007900.1|PACid:27167631	50 kDa	0.13	21926	100	16079	100	100	100	127.017
alpha-xylosidase 1	Phvul.003G035400.1|PACid:27143076	103 kDa	0.12	5	6	7	13	9	7	0.62069		heat shock protein 7Unknown	Phvul.011G065000.1|PACid:27152952	71 kDa	0.13	15234	13131	14044	7221.5	7673.7	14176	1.4588
Bifunctional inhibitor/lipid-transfer protein/seed storage 2S albumin superfamily protein	Phvul.006G207500.1|PACid:27165626	18 kDa	0.12	5	8	6	0.1	0.1	6	3.06452		chaperonin 2Unknown	Phvul.003G128900.1|PACid:27144657	27 kDa	0.13	14973	100	22307	21624	28126	26658	0.489216
glyceraldehyde-3-phosphate dehydrogenase C2	Phvul.009G168400.1|PACid:27146643	40 kDa	0.12	19	8	17	0.1	7	10	2.5731		RAN GTPase 3	Phvul.009G095400.1|PACid:27146252 (+2)	25 kDa	0.13	26207	100	26904	25030	44436	58811	0.414813
Unknown	Phvul.007G080400.1|PACid:27161686	29 kDa	0.12	7	9	8	9	10	9	0.857143		acyl carrier protein 4	Phvul.002G282800.1|PACid:27167585	18 kDa	0.13	18104	12852	23191	32098	19722	30100	0.660974
chlorophyll A/B binding protein 1	Phvul.002G196400.1|PACid:27168445	28 kDa	0.12	24	18	12	8	12	12	1.6875		plastocyanin 1	Phvul.009G020300.1|PACid:27145939	17 kDa	0.14	19785	19307	27434	17311	16111	18341	1.2852
ATPase, FUnknown complex, subunit B/B\', bacterial/chloroplast	Phvul.009G092400.1|PACid:27147636	51 kDa	0.12	10	13	6	5	6	6	1.70588		neurofilament protein-related	Phvul.007G206100.1|PACid:27160092 (+1)	105 kDa	0.14	3592.5	4480.3	5772.5	3163	1475.7	3882.4	1.62483
Protein prenylyltransferase superfamily protein	Phvul.002G187000.1|PACid:27170414	32 kDa	0.13	2	0.1	3	0.1	0.1	0.1	17		cold, circadian rhythm, and rna binding 2	Phvul.011G045000.1|PACid:27151288	17 kDa	0.15	10044.5	10338	11611	9915.4	9836.9	7916.3	1.15631
FK5Unknown6-binding protein 13	Phvul.002G187500.1|PACid:27167853	23 kDa	0.13	0.1	0.1	0.1	3	0.1	2	0.0588235		Transketolase	Phvul.003G037400.1|PACid:27144133	79 kDa	0.15	20125	100	38022	100	100	100	194.157
DNAJ heat shock family protein	Phvul.002G257300.1|PACid:27170908 (+1)	47 kDa	0.13	0.1	0.1	0.1	6	4	0.1	0.029703		pfkB-like carbohydrate kinase family protein	Phvul.005G153300.1|PACid:27150378	35 kDa	0.15	11618	7392.4	14820	100	100	11108	2.99172
reversibly glycosylated polypeptide 3	Phvul.003G040000.1|PACid:27142537	50 kDa	0.13	3	0.1	2	0.1	0.1	0.1	17		Lactoylglutathione lyase / glyoxalase I family protein	Phvul.003G134400.1|PACid:27142532	23 kDa	0.15	100	27289	100	35225	20682	24904	0.340164
2-oxoacid dehydrogenases acyltransferase family protein	Phvul.007G026300.1|PACid:27161528	48 kDa	0.13	0.1	2	3	0.1	0.1	0.1	17		Unknown	Phvul.002G041600.1|PACid:27168988	18 kDa	0.15	100	100	100	14554	25766	100	0.00742207
lactate/malate dehydrogenase family protein	Phvul.007G140600.1|PACid:27158684	48 kDa	0.13	2	3	0.1	0.1	0.1	0.1	17		osmotin 34	Phvul.002G155500.1|PACid:27169514	26 kDa	0.15	12602	8022.7	11046	100	100	10914	2.84962
ADP glucose pyrophosphorylase 1	Phvul.008G284000.1|PACid:27154630	56 kDa	0.13	6	4	0.1	0.1	0.1	0.1	33.6667		GDSL-like Lipase/Acylhydrolase superfamily protein	Phvul.006G169000.1|PACid:27165367	40 kDa	0.15	100	13386	100	16802	12951	10020.3	0.341586
ribosomal protein L5 B	Phvul.010G117700.1|PACid:27141214	34 kDa	0.13	6	0.1	4	0.1	0.1	0.1	33.6667		photosystem I subunit H2	Phvul.010G148800.1|PACid:27139821	15 kDa	0.15	31922	29633	31285	42856	34835	32445	0.842958
Ras-related small GTP-binding family protein	Phvul.011G066700.1|PACid:27151583	24 kDa	0.13	4	0.1	6	0.1	0.1	0.1	33.6667		glyoxalase II 3	Phvul.005G062700.1|PACid:27150501	32 kDa	0.16	100	8282.4	16298	100	100	100	82.268
Ribosomal protein S1Unknownp/S2Unknowne family protein	Phvul.006G055300.1|PACid:27164994	22 kDa	0.13	0.1	0.1	0.1	0.1	2	3	0.0588235		Ribosomal protein S21 family protein	Phvul.001G094500.1|PACid:27164512	20 kDa	0.16	6179.9	100	100	5931.5	11444	4367.4	0.293425
actin-11	Phvul.008G011000.1|PACid:27155877	42 kDa	0.13	13	0.1	9	0.1	0.1	0.1	73.6667		related to ubiquitin 1	Phvul.005G060100.1|PACid:27150216	17 kDa	0.16	10793	15696	14020	10958	11576	10170	1.23866
protein tyrosine phosphatases;protein tyrosine phosphatases	Phvul.011G091000.1|PACid:27152953	30 kDa	0.13	0.1	0.1	0.1	0.1	3	2	0.0588235		2 iron, 2 sulfur cluster binding	Phvul.004G125800.1|PACid:27157790	12 kDa	0.17	25612	32916	29023	25600	26615	17603	1.25399
6UnknownS acidic ribosomal protein family	Phvul.009G045800.1|PACid:27146569	11 kDa	0.13	0.1	0.1	6	9	4	7	0.31		Cyclophilin-like peptidyl-prolyl cis-trans isomerase family protein	Phvul.011G148100.1|PACid:27152035	46 kDa	0.17	19060	13512	7354.6	21985	48059	19030	0.448241
Uncharacterised BCR, YbaB family COGUnknown718	Phvul.005G005700.1|PACid:27150107	21 kDa	0.13	0.1	4	4	6	7	4	0.476471		DnaJ/Hsp4Unknown cysteine-rich domain superfamily protein	Phvul.001G007500.1|PACid:27162776	17 kDa	0.17	100	100	5971.3	5789.7	4007.3	7130.4	0.364575
HISTIDINE TRIAD NUCLEOTIDE-BINDING 2	Phvul.009G240300.1|PACid:27145569	19 kDa	0.13	0.1	3	4	4	5	5	0.507143		Aldolase superfamily protein	Phvul.008G189200.1|PACid:27156044	39 kDa	0.17	14568	13344	10848	7036.9	11171	11454	1.30673
GroES-like family protein	Phvul.002G095400.1|PACid:27171245	11 kDa	0.14	0.1	0.1	0.1	5	3	0.1	0.037037		heat shock factor binding protein	Phvul.007G106500.1|PACid:27160354	10 kDa	0.18	100	100	11179	11380	13547	6732.8	0.359415
germin 3	Phvul.010G129600.1|PACid:27140606	22 kDa	0.14	0.1	0.1	0.1	3	5	0.1	0.037037		biotin/lipoyl attachment domain-containing protein	Phvul.001G247000.1|PACid:27162259	31 kDa	0.18	26404	100	24017	24886	38307	31976	0.530856
MD-2-related lipid recognition domain-containing protein	Phvul.011G100100.1|PACid:27151261	17 kDa	0.14	0.1	0.1	0.1	7	4	0.1	0.027027		ferredoxin-NADP(+)-oxidoreductase 1	Phvul.003G263200.1|PACid:27142088	41 kDa	0.18	17008	21456	17381	7362.8	18423	13242	1.4309
CP12 domain-containing protein 2	Phvul.007G214200.1|PACid:27161496	14 kDa	0.14	6	8	10	23	9	15	0.510638		poly(A) binding protein 2	Phvul.003G047500.1|PACid:27144812	70 kDa	0.19	15457	12866	13951	15770	20748	14930	0.821684
Photosystem II 5 kD protein	Phvul.011G009700.1|PACid:27152166	11 kDa	0.15	0.1	9	5	0.1	0.1	0.1	47		glycine-rich protein 2B	Phvul.011G033900.1|PACid:27151676	19 kDa	0.19	8681.9	10423	10720	9846.6	12671	15058	0.793731
Inositol monophosphatase family protein	Phvul.006G142400.1|PACid:27165516 (+1)	33 kDa	0.15	6	0.1	11	0.1	0.1	0.1	57		MLP-like protein 423	Phvul.003G109100.1|PACid:27142580	17 kDa	0.19	18686	14560	25554	100	100	21339	2.72993
Transcriptional coactivator/pterin dehydratase	Phvul.007G240500.1|PACid:27160038	24 kDa	0.15	5	0.1	3	8	6	4	0.45		light harvesting complex of photosystem II 5	Phvul.004G128200.1|PACid:27158466	31 kDa	0.19	14108	10356	10644	9320	10875	5273.4	1.37849
Lactoylglutathione lyase / glyoxalase I family protein	Phvul.003G134400.1|PACid:27142532	23 kDa	0.15	0.1	6	0.1	7	7	4	0.344444		2Fe-2S ferredoxin-like superfamily protein	Phvul.002G045400.1|PACid:27168785	16 kDa	0.2	21508	16812	14525	12173	13260	16387	1.26363
ATP synthase alpha/beta family protein	Phvul.007G034800.1|PACid:27160532	60 kDa	0.15	13	15	5	0.1	7	6	2.51908		alpha-xylosidase 1	Phvul.003G035400.1|PACid:27143076	103 kDa	0.2	14247	16684	19778	21215	21689	17469	0.839928
Glycine cleavage T-protein family	Phvul.003G080400.1|PACid:27143356	44 kDa	0.15	20	33	17	14	16	13	1.62791		pathogenesis-related 4	Phvul.006G102300.1|PACid:27166843	16 kDa	0.2	16737	14233	37939	100	100	21255	3.21179
Nucleic acid-binding, OB-fold-like protein	Phvul.001G199400.1|PACid:27163065 (+1)	8 kDa	0.16	0.1	0.1	0.1	0.1	3	6	0.032967		Rad23 UV excision repair protein family	Phvul.007G026400.1|PACid:27161353	42 kDa	0.2	12019	13110	20001	20837	17958	18655	0.785553
DC1 domain-containing protein	Phvul.003G061100.1|PACid:27143600	64 kDa	0.16	4	0.1	2	0.1	0.1	0.1	20.3333		Phosphoglycerate mutase, 2,3-bisphosphoglycerate-independent	Phvul.008G077900.1|PACid:27155277	61 kDa	0.2	22737	100	18876	7149.4	100	100	5.6757
tubulin alpha-2 chain	Phvul.002G007900.1|PACid:27167631	50 kDa	0.16	6	0.1	3	0.1	0.1	0.1	30.3333		serine hydroxymethyltransferase 4	Phvul.001G266600.1|PACid:27162877 (+1)	52 kDa	0.2	15502	100	18299	16100	21057	25380	0.542095
GroES-like family protein	Phvul.010G041700.1|PACid:27141362	15 kDa	0.16	5	9	5	9	8	9	0.730769		ascorbate peroxidase 4	Phvul.008G176700.1|PACid:27156217	38 kDa	0.21	17052	13764	14454	100	9124.7	15609	1.82293
Tautomerase/MIF superfamily protein	Phvul.008G092500.1|PACid:27153936	12 kDa	0.16	7	5	6	10	9	6	0.72		thioredoxin Y1	Phvul.007G080600.1|PACid:27160155	20 kDa	0.21	31119	19369	22510	32041	26487	32021	0.806171
mitochondrial lipoamide dehydrogenase 1	Phvul.003G118800.1|PACid:27145068	53 kDa	0.16	16	16	12	14	10	6	1.46667		photosystem I reaction center subunit PSI-N, chloroplast, putative / PSI-N, putative (PSAN)	Phvul.002G269400.1|PACid:27171035	18 kDa	0.22	23601	29492	27527	38837	29236	28724	0.832877
Protein of unknown function, DUF642	Phvul.001G053100.1|PACid:27162892	40 kDa	0.16	13	12	14	9	10	13	1.21875		Translation elongation factor EF1B/ribosomal protein S6 family protein	Phvul.001G007700.1|PACid:27162385	25 kDa	0.22	14373	19049	18053	100	14927	14337	1.753
calcium sensing receptor	Phvul.003G180100.1|PACid:27143766	41 kDa	0.16	8	13	6	7	0.1	5	2.2314		FASCICLIN-like arabinoogalactan 9	Phvul.005G099500.1|PACid:27149459	26 kDa	0.23	100	20474	100	18602	15436	15504	0.417302
4Unknowns ribosomal protein SA B	Phvul.010G125100.1|PACid:27140930 (+2)	34 kDa	0.16	14	5	12	3	4	8	2.06667		Unknown	Phvul.008G118700.1|PACid:27154152	14 kDa	0.23	6176.7	15769	10096.9	7376.3	100	8330.4	2.02715
thylakoid rhodanese-like	Phvul.010G112100.1|PACid:27140271	47 kDa	0.16	6	10	6	2	2	7	2		glycosylphosphatidylinositol-anchored lipid protein transfer 1	Phvul.001G262400.1|PACid:27162408	20 kDa	0.23	100	11979	53612	60710	44643	35493	0.466403
Transducin/WD4Unknown repeat-like superfamily protein	Phvul.002G070400.1|PACid:27167818	36 kDa	0.16	6	4	6	7	6	10	0.695652		DegP protease 1	Phvul.004G013600.1|PACid:27156458	45 kDa	0.24	12925	15455	100	16211	13033	21794	0.558016
vacuolar membrane ATPase 1Unknown	Phvul.007G220600.1|PACid:27161482	12 kDa	0.17	0.1	0.1	0.1	11	5	0.1	0.0186335		GDSL-like Lipase/Acylhydrolase superfamily protein	Phvul.006G169100.1|PACid:27166530	40 kDa	0.25	100	17624	100	13354	14400	13928	0.427619
PDI-like 1-2	Phvul.009G126800.1|PACid:27147260	58 kDa	0.17	29	11	20	2	7	17	2.30769		ATP synthase alpha/beta family protein	Phvul.007G034800.1|PACid:27160532	60 kDa	0.25	18779	19818	19813	100	17986	16952	1.66705
ribosome recycling factor, chloroplast precursor	Phvul.007G172400.1|PACid:27161702	30 kDa	0.17	9	15	15	24	21	13	0.672414		NmrA-like negative transcriptional regulator family protein	Phvul.009G059000.1|PACid:27147962	34 kDa	0.25	15304	13896	20420	100	100	20802	2.36263
allene oxide cyclase 4	Phvul.008G020200.1|PACid:27155432	27 kDa	0.18	0.1	0.1	0.1	5	0.1	2	0.0422535		rubisco activase	Phvul.008G192400.1|PACid:27154954	52 kDa	0.25	17491	15937	16848	26530	20131	15991	0.802464
photosystem II light harvesting complex gene 2.1	Phvul.008G285100.1|PACid:27154358	29 kDa	0.18	15	0.1	6	0.1	0.1	0.1	70.3333		basic chitinase	Phvul.009G116700.1|PACid:27148034	38 kDa	0.25	16987	10772	15319	100	100	17913	2.37829
UDP-glucose pyrophosphorylase 2	Phvul.008G240600.1|PACid:27154606	52 kDa	0.18	7	17	8	0.1	7	6	2.44275		RAB GTPase homolog E1B	Phvul.003G205600.1|PACid:27144536	52 kDa	0.25	17509	10908	15438	100	13611	11586	1.7336
Unknown	Phvul.002G041600.1|PACid:27168988	18 kDa	0.19	0.1	0.1	0.1	11	4	0.1	0.0198675		BolA-like family protein	Phvul.007G281100.1|PACid:27159858 (+1)	18 kDa	0.25	20305	27069	17607	21851	27380	31731	0.802611
Hyaluronan / mRNA binding family	Phvul.007G003500.1|PACid:27160423	39 kDa	0.19	0.1	0.1	3	2	3	3	0.4		NAD(P)-binding Rossmann-fold superfamily protein	Phvul.008G119600.1|PACid:27156284	36 kDa	0.26	17392	13341	16814	12988	15391	13350	1.13942
plastid transcriptionally active 4	Phvul.008G099200.1|PACid:27154097 (+1)	36 kDa	0.19	3	5	6	4	0.1	3	1.97183		O-acetylserine (thiol) lyase isoform C	Phvul.003G060200.1|PACid:27141782	35 kDa	0.26	19477	20926	17912	28113	19170	22015	0.841511
Ribosomal protein S5 family protein	Phvul.003G018300.1|PACid:27144624	30 kDa	0.19	9	6	8	5	6	7	1.27778		photosynthetic electron transfer C	Phvul.005G109400.1|PACid:27148765	24 kDa	0.26	12333	16482	13775	21429	14816	15771	0.818787
subtilase 4.12	Phvul.001G238100.1|PACid:27163105	78 kDa	0.2	46	31	54	23	17	43	1.57831		purple acid phosphatase 26	Phvul.003G170500.2|PACid:27143543	53 kDa	0.26	15684	8851.5	20326	12735	100	11399	1.85118
Ribulose bisphosphate carboxylase (small chain) family protein	Phvul.004G064800.1|PACid:27157331 (+1)	20 kDa	0.2	44	46	32	27	36	35	1.2449		Tetratricopeptide repeat (TPR)-like superfamily protein	Phvul.001G235600.1|PACid:27162446	24 kDa	0.26	11460	11696	16601	10259	8957.5	12643	1.24789
glycine-rich protein 2B	Phvul.009G025100.1|PACid:27146047	19 kDa	0.2	4	3	7	17	9	5	0.451613		actin-11	Phvul.004G001000.1|PACid:27156550	42 kDa	0.27	13624	10866	8606.1	6452.1	6233.9	11661	1.35935
ribosomal protein S13A	Phvul.010G082900.1|PACid:27140954	17 kDa	0.21	6	0.1	2	0.1	0.1	0.1	27		subtilase 4.12	Phvul.001G238100.1|PACid:27163105	78 kDa	0.27	26387	14947	30660	14204	12293	23406	1.44268
heat shock protein 7Unknown	Phvul.011G065000.1|PACid:27152952	71 kDa	0.21	18	10	16	7	4	15	1.69231		alanine:glyoxylate aminotransferase	Phvul.006G029100.1|PACid:27165422 (+1)	44 kDa	0.27	23029	19202	100	11328	100	100	3.67202
glycine-rich protein 2B	Phvul.011G033900.1|PACid:27151676	19 kDa	0.21	8	11	15	19	12	16	0.723404		Leucine-rich repeat (LRR) family protein	Phvul.005G149200.1|PACid:27149882	38 kDa	0.27	23617	18574	26579	23774	25994	31256	0.848761
Eukaryotic aspartyl protease family protein	Phvul.009G144100.1|PACid:27146478	47 kDa	0.21	0.1	0.1	2	0.1	5	8	0.167939		FASCICLIN-like arabinogalactan 1	Phvul.006G057400.1|PACid:27165543	44 kDa	0.28	100	100	13251	9883.1	9784.4	10304	0.448793
chloroplastic acetylcoenzyme A carboxylase 1	Phvul.008G053000.1|PACid:27156321	28 kDa	0.21	7	6	8	5	5	7	1.23529		Cyclophilin-like peptidyl-prolyl cis-trans isomerase family protein	Phvul.003G178500.1|PACid:27144974	42 kDa	0.28	17768	14103	13254	12716	13454	13629	1.13382
small ubiquitin-like modifier 2	Phvul.006G047600.1|PACid:27166464	11 kDa	0.21	0.1	0.1	2	5	0.1	5	0.217822		photosystem II subunit P-1	Phvul.003G247600.1|PACid:27144472	28 kDa	0.28	33605	36164	30708	44973	34218	35281	0.877743
Enolase	Phvul.001G186100.1|PACid:27162935	48 kDa	0.21	42	36	52	20	34	41	1.36842		2UnknownS proteasome alpha subunit E2	Phvul.007G021000.1|PACid:27159393	26 kDa	0.29	31646	14309	15641	100	14926	18043	1.86265
chloroplast stem-loop binding protein of 41 kDa	Phvul.007G172100.1|PACid:27158479	44 kDa	0.21	5	9	0.1	0.1	2	0.1	6.40909		Glyoxalase/Bleomycin resistance protein/Dioxygenase superfamily protein	Phvul.002G310700.1|PACid:27167538	39 kDa	0.29	20646	13522	17164	26118	16475	21369	0.802539
chloroplast RNA-binding protein 33	Phvul.001G196700.1|PACid:27162780	34 kDa	0.21	8	4	8	0.1	7	2	2.1978		FKBP-like peptidyl-prolyl cis-trans isomerase family protein	Phvul.008G009400.1|PACid:27154683	30 kDa	0.3	100	19165	10147	16896	18817	13799	0.594038
triosephosphate isomerase	Phvul.005G144100.1|PACid:27148403	27 kDa	0.22	29	28	27	2	24	25	1.64706		Bifunctional inhibitor/lipid-transfer protein/seed storage 2S albumin superfamily protein	Phvul.006G207500.1|PACid:27165626	18 kDa	0.3	38706	29918	25115	100	100	41780	2.23294
Cobalamin-independent synthase family protein	Phvul.001G113800.1|PACid:27163218	84 kDa	0.22	28	8	27	8	13	13	1.85294		chaperonin 2Unknown	Phvul.009G224900.1|PACid:27147885	26 kDa	0.3	32461	36235	31048	31635	32629	28176	1.07901
Glutathione S-transferase, C-terminal-like;Translation elongation factor EF1B/ribosomal protein S6	Phvul.008G204800.1|PACid:27153650	24 kDa	0.22	9	7	11	0.1	7	8	1.78808		ketol-acid reductoisomerase	Phvul.011G134200.1|PACid:27152507	63 kDa	0.3	100	100	11244	24179	100	15970	0.28433
osmotin 34	Phvul.002G155500.1|PACid:27169514	26 kDa	0.23	28	10	38	0.1	0.1	26	2.90076		glycine-rich RNA-binding protein 3	Phvul.003G184700.1|PACid:27144667	29 kDa	0.3	100	16704	10875	13717	14772	16632	0.613439
ribosomal protein L23AB	Phvul.011G067600.1|PACid:27152268	17 kDa	0.23	9	0.1	6	0.1	0.1	3	4.71875		lipid transfer protein 4	Phvul.008G087000.1|PACid:27153492	12 kDa	0.31	28904	22204	31828	28107	22171	19243	1.19296
thioredoxin M-type 4	Phvul.009G133900.1|PACid:27147068	20 kDa	0.23	4	15	7	23	12	12	0.553191		RNA-binding (RRM/RBD/RNP motifs) family protein	Phvul.007G130600.1|PACid:27159662 (+1)	48 kDa	0.31	100	100	10232	5581.5	6202.1	12682	0.426395
O-acetylserine (thiol) lyase (OAS-TL) isoform A1	Phvul.006G099100.1|PACid:27165095	34 kDa	0.23	10	8	7	4	4	9	1.47059		6UnknownS acidic ribosomal protein family	Phvul.009G045800.1|PACid:27146569	11 kDa	0.31	100	100	11652	8099.9	7952.3	9177	0.469773
profilin 2	Phvul.002G307600.1|PACid:27169401	14 kDa	0.23	8	7	3	5	3	3	1.63636		Eukaryotic aspartyl protease family protein	Phvul.009G144100.1|PACid:27146478	47 kDa	0.31	100	100	13856	100	18305	28331	0.300753
beta-D-xylosidase 4	Phvul.006G208200.1|PACid:27167166	84 kDa	0.23	7	4	12	0.1	3	7	2.27723		photosystem I light harvesting complex gene 3	Phvul.008G289700.1|PACid:27154013	30 kDa	0.31	24290	40322	27373	50919	43839	26970	0.75566
FASCICLIN-like arabinoogalactan 9	Phvul.005G099500.1|PACid:27149459	26 kDa	0.24	0.1	11	0.1	10	6	12	0.4		Calcium-binding EF-hand family protein	Phvul.002G060300.1|PACid:27167863	16 kDa	0.31	30844	22847	31267	33600	29248	32652	0.889613
3UnknownS ribosomal protein, putative	Phvul.009G045100.1|PACid:27147476	37 kDa	0.24	7	3	4	0.1	4	3	1.97183		photosystem II reaction center PSB28 protein	Phvul.007G153500.1|PACid:27160448	20 kDa	0.31	19822	28300	21284	23521	17868	15747	1.21475
adenine phosphoribosyl transferase 1	Phvul.009G070900.1|PACid:27146925	27 kDa	0.24	9	5	10	0.1	2	9	2.16216		post-illumination chlorophyll fluorescence increase	Phvul.010G156300.1|PACid:27141410	30 kDa	0.31	100	20676	100	34539	32212	100	0.312277
eukaryotic elongation factor 5A-1	Phvul.009G184600.1|PACid:27146450	18 kDa	0.25	4	4	6	3	4	4	1.27273		chlorophyll A/B binding protein 1	Phvul.004G091600.1|PACid:27157179 (+1)	28 kDa	0.32	32283	23787	39607	24931	26684	28295	1.19731
chloroplast thylakoid lumen protein	Phvul.003G166300.1|PACid:27142618	35 kDa	0.25	5	14	5	0.1	5	5	2.37624		GroES-like family protein	Phvul.010G041700.1|PACid:27141362	15 kDa	0.32	15481	17896	17706	18310	19993	16836	0.92644
chaperonin 2Unknown	Phvul.003G128900.1|PACid:27144657	27 kDa	0.26	6	0.1	4	6	6	5	0.594118		Glucose-methanol-choline (GMC) oxidoreductase family protein	Phvul.003G213000.1|PACid:27143592	63 kDa	0.32	12712	100	100	100	18216	20856	0.329623
2 iron, 2 sulfur cluster binding	Phvul.004G125800.1|PACid:27157790	12 kDa	0.26	5	12	6	18	10	9	0.621622		P-loop containing nucleoside triphosphate hydrolases superfamily protein	Phvul.006G178400.1|PACid:27167211	46 kDa	0.32	23910	21634	26113	100	16155	27715	1.62968
aleurain-like protease	Phvul.009G227100.1|PACid:27148097	39 kDa	0.26	10	19	16	14	10	9	1.36364		Hyaluronan / mRNA binding family	Phvul.007G003500.1|PACid:27160423	39 kDa	0.33	100	100	18401	12826	12483	13446	0.479964
photosystem I subunit F	Phvul.003G186300.1|PACid:27143658	24 kDa	0.26	0.1	9	5	0.1	3	0.1	4.40625		S-adenosylmethionine synthetase family protein	Phvul.003G120000.1|PACid:27144204	43 kDa	0.33	16530	11554	16740	19605	13858	20071	0.8373
Ribosomal protein S4 (RPS4A) family protein	Phvul.008G221000.1|PACid:27153328 (+1)	30 kDa	0.26	7	0.1	5	0.1	0.1	3	3.78125		proteasome subunit PAB1	Phvul.005G059300.1|PACid:27149616	26 kDa	0.33	22199	15682	17998	100	14472	20227	1.60576
NAD(P)-binding Rossmann-fold superfamily protein	Phvul.008G119600.1|PACid:27156284	36 kDa	0.27	11	15	21	10	11	14	1.34286		thioredoxin X	Phvul.007G015500.1|PACid:27160930	20 kDa	0.33	20042	15692	100	17129	23408	16849	0.624438
acetyl Co-enzyme a carboxylase biotin carboxylase subunit	Phvul.002G302900.1|PACid:27167697	58 kDa	0.27	6	3	5	6	5	7	0.777778		copper/zinc superoxide dismutase 2	Phvul.011G086300.1|PACid:27152804	21 kDa	0.33	20179	17331	15282	15622	14782	17127	1.11069
Subtilase family protein	Phvul.010G128600.1|PACid:27141368	83 kDa	0.27	7	10	12	19	12	10	0.707317		Transketolase	Phvul.007G006600.1|PACid:27159083	80 kDa	0.34	17423	17790	16902	26164	19553	16068	0.84349
glutamate synthase 1	Phvul.001G123900.1|PACid:27162883	176 kDa	0.27	17	28	33	7	20	24	1.52941		ATP synthase epsilon chain	Phvul.010G031400.1|PACid:27141616	8 kDa	0.34	37013	20406	28463	26230	24379	17730	1.25671
alanine:glyoxylate aminotransferase	Phvul.006G029100.1|PACid:27165422 (+1)	44 kDa	0.28	3	8	0.1	2	0.1	0.1	5.04545		dehydroascorbate reductase 2	Phvul.007G009800.1|PACid:27158987	23 kDa	0.34	20105	27270	21707	28710	33930	20781	0.828113
methyl-CPG-binding domain 1Unknown	Phvul.010G155700.1|PACid:27140389	32 kDa	0.28	3	7	6	7	6	8	0.761905		triosephosphate isomerase	Phvul.005G144100.1|PACid:27148403	27 kDa	0.35	19219	21688	24773	9235.5	23255	18935	1.27719
catalase 2	Phvul.009G011100.1|PACid:27146649	57 kDa	0.28	5	3	4	0.1	3	4	1.69014		glyoxalase I homolog	Phvul.003G079700.1|PACid:27145095	32 kDa	0.35	15013	100	15093	100	10695	100	2.77246
NmrA-like negative transcriptional regulator family protein	Phvul.009G059000.1|PACid:27147962	34 kDa	0.29	10	6	9	0.1	0.1	11	2.23214		Ribosomal protein L1p/L1Unknowne family	Phvul.011G011500.1|PACid:27152548	38 kDa	0.35	16719	15570	21485	100	18636	15879	1.55349
D-mannose binding lectin protein with Apple-like carbohydrate-binding domain	Phvul.005G066000.1|PACid:27150055	50 kDa	0.29	4	5	6	4	5	3	1.25		Cysteine proteinases superfamily protein	Phvul.001G220100.1|PACid:27164419 (+1)	40 kDa	0.35	100	100	9544.6	14479	100	12339	0.362011
Lactate/malate dehydrogenase family protein	Phvul.007G273500.1|PACid:27159288	35 kDa	0.29	24	16	25	0.1	9	26	1.85185		MLP-like protein 423	Phvul.009G253000.1|PACid:27146855	17 kDa	0.35	13106	100	22800	100	100	11473	3.08455
Unknown	Phvul.008G216800.1|PACid:27154777	15 kDa	0.29	0.1	13	9	6	0.1	0.1	3.56452		RAB GTPase 11C	Phvul.006G220200.1|PACid:27166794	24 kDa	0.35	100	100	18853	23043	100	30918	0.352435
plastocyanin 1	Phvul.009G020300.1|PACid:27145939	17 kDa	0.3	36	67	37	74	70.1	45	0.740349		photosystem II subunit Q-2	Phvul.010G052300.1|PACid:27141041	24 kDa	0.35	38882	51321	37369	34570	40442	37647	1.13237
MLP-like protein 423	Phvul.003G109100.1|PACid:27142580	17 kDa	0.3	18	9	42	0.1	0.1	24	2.85124		Hyaluronan / mRNA binding family	Phvul.008G047300.1|PACid:27154232	39 kDa	0.36	19384	5628.2	12917	100	100	16616	2.25554
gamma-glutamyl hydrolase 1	Phvul.005G080600.1|PACid:27148830	38 kDa	0.3	14	3	28	5	5	9	2.36842		ribosomal protein L23AB	Phvul.011G067600.1|PACid:27152268	17 kDa	0.37	12944	100	12506	100	100	9366	2.67092
germin 3	Phvul.003G131400.1|PACid:27142835	21 kDa	0.3	15	11	12	11	18	19	0.791667		chloroplastic drought-induced stress protein of 32 kD	Phvul.001G002100.1|PACid:27163238	34 kDa	0.37	100	20590	100	100	100	100	69.3
calreticulin 1a	Phvul.007G200800.1|PACid:27161178	48 kDa	0.3	14	6	23	0.1	9	12	2.03791		GYF domain-containing protein	Phvul.001G015100.3|PACid:27162510	188 kDa	0.37	100	100	5169.8	100	100	100	17.8993
S-adenosylmethionine synthetase 1	Phvul.001G216700.1|PACid:27164697	43 kDa	0.3	3	0.1	0.1	0.1	4	11	0.211921		ribosomal protein S9	Phvul.001G017500.1|PACid:27162426	22 kDa	0.37	10624	100	100	100	100	100	36.08
Cyclophilin-like peptidyl-prolyl cis-trans isomerase family protein	Phvul.011G148100.1|PACid:27152035	46 kDa	0.31	6	14	4	6	4	3	1.84615		phospholipase A 2A	Phvul.001G020100.1|PACid:27163730	45 kDa	0.37	100	100	10075.7	100	100	100	34.2523
Phosphoglycerate kinase family protein	Phvul.005G050700.1|PACid:27148804	50 kDa	0.31	65	74	58	55	65	58	1.10674		poly(A) binding protein 2	Phvul.001G023500.1|PACid:27162666	72 kDa	0.37	100	100	100	10888	100	100	0.0270563
thioredoxin family protein	Phvul.007G215900.1|PACid:27159210	40 kDa	0.31	8	0.1	8	0.1	0.1	5	3.09615		Tetratricopeptide repeat (TPR)-like superfamily protein	Phvul.001G081700.1|PACid:27162130	58 kDa	0.37	100	100	5086.8	100	100	100	17.6227
hydroxymethylbilane synthase	Phvul.002G034500.1|PACid:27168859	42 kDa	0.31	16	9	14	7	12	11	1.3		CCR-like	Phvul.001G085200.1|PACid:27164772	15 kDa	0.37	100	18408	100	100	100	100	62.0267
tubulin beta 8	Phvul.006G126100.1|PACid:27165097	50 kDa	0.32	19	8	7	4	7	9	1.7		calmodulin 5	Phvul.001G102700.1|PACid:27162315 (+3)	17 kDa	0.37	100	100	14918	100	100	100	50.3933
6UnknownS acidic ribosomal protein family	Phvul.001G188200.1|PACid:27162099	23 kDa	0.32	11	7	10	16	13	8	0.756757		photosynthetic electron transfer A	Phvul.001G117600.1|PACid:27164709	11 kDa	0.37	100	100	100	15637	100	100	0.018943
Cyclophilin-like peptidyl-prolyl cis-trans isomerase family protein	Phvul.003G178500.1|PACid:27144974	42 kDa	0.33	8	14	6	7	6	7	1.4		Ribosomal protein S1Unknownp/S2Unknowne family protein	Phvul.001G139900.1|PACid:27162563	14 kDa	0.37	34622	100	100	100	100	100	116.073
photosystem II subunit P-1	Phvul.003G247600.1|PACid:27144472	28 kDa	0.33	35	52	46	37	38	41	1.14655		Ribosomal protein L14p/L23e family protein	Phvul.001G164200.1|PACid:27162831 (+1)	15 kDa	0.37	100	100	100	38968	100	100	0.00765931
glyoxalase I homolog	Phvul.003G079700.1|PACid:27145095	32 kDa	0.33	4	0.1	5	0.1	3	0.1	2.84375		GroES-like zinc-binding dehydrogenase family protein	Phvul.001G167100.1|PACid:27164087 (+1)	41 kDa	0.37	11354	100	100	100	100	100	38.5133
Quinone reductase family protein	Phvul.002G219700.1|PACid:27170433	22 kDa	0.33	0.1	2	6	5	4	5	0.578571		histone H4	Phvul.001G169200.1|PACid:27164686 (+11)	11 kDa	0.37	100	100	23926	100	100	100	80.42
NADP-malic enzyme 4	Phvul.004G170800.1|PACid:27157719	65 kDa	0.33	4	0.1	5	0.1	0.1	3	2.84375		Pyridoxal-dependent decarboxylase family protein	Phvul.001G177300.1|PACid:27164551	54 kDa	0.37	17362	100	100	100	100	100	58.54
glutamate-1-semialdehyde 2,1-aminomutase 2	Phvul.009G118500.1|PACid:27146116	50 kDa	0.33	10	4	3	2	2	5	1.88889		ribosomal protein L2	Phvul.001G180400.1|PACid:27164062	15 kDa	0.37	17340	100	100	100	100	100	58.4667
cytochrome C oxidase 6B	Phvul.008G176600.1|PACid:27154052	20 kDa	0.33	5	5	9	6	4	4	1.35714		starch branching enzyme 2.2	Phvul.001G187600.1|PACid:27163434	99 kDa	0.37	100	8147.3	100	100	100	100	27.8243
rubisco activase	Phvul.008G192400.1|PACid:27154954	52 kDa	0.34	39	48	37	49	50	40	0.892086		Tubulin/FtsZ family protein	Phvul.001G189700.1|PACid:27164336	50 kDa	0.37	100	100	100	100	13615	100	0.0217155
basic chitinase	Phvul.009G116700.1|PACid:27148034	38 kDa	0.34	20	2	20	0.1	0.1	16	2.59259		Ribosomal protein L19e family protein	Phvul.001G210100.1|PACid:27164432	25 kDa	0.37	9224.3	100	100	100	100	100	31.4143
carbonic anhydrase 1	Phvul.004G013500.1|PACid:27157066 (+4)	37 kDa	0.34	31	46	32	32	31	30	1.17204		Photosystem II reaction center PsbP family protein	Phvul.001G224100.1|PACid:27163853	29 kDa	0.37	100	100	8331.2	100	100	100	28.4373
photosystem I reaction center subunit PSI-N, chloroplast, putative / PSI-N, putative (PSAN)	Phvul.002G269400.1|PACid:27171035	18 kDa	0.35	20	37	30	25	24	22	1.22535		Protein of unknown function, DUF538	Phvul.001G224400.1|PACid:27164202	18 kDa	0.37	100	100	100	100	100	27406	0.0108672
photosystem I light harvesting complex gene 3	Phvul.008G289700.1|PACid:27154013	30 kDa	0.35	9	11	6	6	7	8	1.2381		haloacid dehalogenase-like hydrolase family protein	Phvul.001G224700.1|PACid:27163351	116 kDa	0.37	100	100	100	13185	100	100	0.0224131
Unknown	Phvul.006G082200.1|PACid:27166837	27 kDa	0.35	7	7	10	0.1	9	6	1.5894		Unknown	Phvul.001G252000.1|PACid:27162615	32 kDa	0.37	100	100	100	18243	100	100	0.0162663
Tim1Unknown/DDP family zinc finger protein	Phvul.011G064100.1|PACid:27151760	11 kDa	0.35	0.1	0.1	5	7	0.1	7	0.368794		Thioredoxin superfamily protein	Phvul.002G023500.1|PACid:27170374	29 kDa	0.37	100	7046.3	100	100	100	100	24.1543
Papain family cysteine protease	Phvul.001G009900.1|PACid:27164490	40 kDa	0.35	0.1	4	3	5	2	5	0.591667		O-acetylserine (thiol) lyase (OAS-TL) isoform A1	Phvul.002G045200.1|PACid:27170844	34 kDa	0.37	100	6787.4	100	100	100	100	23.2913
Glycosyl hydrolase superfamily protein	Phvul.011G177000.1|PACid:27152442	37 kDa	0.36	24	4	31	0.1	0.1	24	2.43802		stress-inducible protein, putative	Phvul.002G060800.1|PACid:27170425	65 kDa	0.37	100	100	100	100	100	19691	0.0150822
Uroporphyrinogen decarboxylase	Phvul.001G248800.1|PACid:27164776	43 kDa	0.36	7	0.1	3	0.1	0.1	3	3.15625		Unknown	Phvul.002G069000.1|PACid:27170749	20 kDa	0.37	100	100	100	13330	100	100	0.0221729
pathogenesis-related 4	Phvul.006G102200.1|PACid:27165793	21 kDa	0.36	23	4	26	5	0.1	20	2.11155		carbonic anhydrase 2	Phvul.002G071200.1|PACid:27169236 (+1)	30 kDa	0.37	100	100	100	100	19095	100	0.0155481
ATPase, V1 complex, subunit B protein	Phvul.008G050000.1|PACid:27155571	54 kDa	0.36	10	0.1	7	0.1	3	4	2.40845		pyruvate dehydrogenase complex E1 alpha subunit	Phvul.002G077600.1|PACid:27171151	43 kDa	0.37	100	13380	100	100	100	100	45.2667
photosystem II family protein	Phvul.005G105900.1|PACid:27148554	18 kDa	0.37	14	17	11	15	15	18	0.875		Cyclophilin-like peptidyl-prolyl cis-trans isomerase family protein	Phvul.002G088300.1|PACid:27171333	25 kDa	0.37	100	100	13166	100	100	100	44.5533
Unknown	Phvul.008G118700.1|PACid:27154152	14 kDa	0.37	5	7	5	6	0.1	5	1.53153		Plastid-lipid associated protein PAP / fibrillin family protein	Phvul.002G137800.1|PACid:27168752	39 kDa	0.37	100	100	6960	100	100	100	23.8667
chloroplastic drought-induced stress protein of 32 kD	Phvul.001G002100.1|PACid:27163238	34 kDa	0.37	0.1	3	0.1	0.1	0.1	0.1	10.6667		alanine-2-oxoglutarate aminotransferase 2	Phvul.002G150800.1|PACid:27168605	54 kDa	0.37	100	14813	100	100	100	100	50.0433
GYF domain-containing protein	Phvul.001G015100.3|PACid:27162510	188 kDa	0.37	0.1	0.1	2	0.1	0.1	0.1	7.33333		Double Clp-N motif protein	Phvul.002G151400.1|PACid:27170113	26 kDa	0.37	100	100	100	100	3461.1	100	0.0819426
ribosomal protein S9	Phvul.001G017500.1|PACid:27162426	22 kDa	0.37	6	0.1	0.1	0.1	0.1	0.1	20.6667		glutathione peroxidase 8	Phvul.002G157200.1|PACid:27170792	19 kDa	0.37	100	100	19254	100	100	100	64.8467
phospholipase A 2A	Phvul.001G020100.1|PACid:27163730	45 kDa	0.37	0.1	0.1	2	0.1	0.1	0.1	7.33333		double-stranded DNA-binding family protein	Phvul.002G197500.1|PACid:27168531	15 kDa	0.37	100	100	22370	100	100	100	75.2333
poly(A) binding protein 2	Phvul.001G023500.1|PACid:27162666	72 kDa	0.37	0.1	0.1	0.1	4	0.1	0.1	0.0714286		ortholog of human splicing factor SC35	Phvul.002G208600.1|PACid:27169938 (+2)	31 kDa	0.37	28622	100	100	100	100	100	96.0733
Tetratricopeptide repeat (TPR)-like superfamily protein	Phvul.001G081700.1|PACid:27162130	58 kDa	0.37	0.1	0.1	3	0.1	0.1	0.1	10.6667		MLP-like protein 423	Phvul.002G209400.1|PACid:27170360 (+1)	16 kDa	0.37	100	100	25443	100	100	100	85.4767
CCR-like	Phvul.001G085200.1|PACid:27164772	15 kDa	0.37	0.1	6	0.1	0.1	0.1	0.1	20.6667		Cox19-like CHCH family protein	Phvul.002G214000.1|PACid:27170329	14 kDa	0.37	100	100	100	100	100	6396.2	0.0454807
calmodulin 5	Phvul.001G102700.1|PACid:27162315 (+3)	17 kDa	0.37	0.1	0.1	8	0.1	0.1	0.1	27.3333		NAD(P)-linked oxidoreductase superfamily protein	Phvul.002G216600.1|PACid:27169853	34 kDa	0.37	10025.9	100	100	100	100	100	34.0863
photosynthetic electron transfer A	Phvul.001G117600.1|PACid:27164709	11 kDa	0.37	0.1	0.1	0.1	5	0.1	0.1	0.0576923		Pyridoxal phosphate (PLP)-dependent transferases superfamily protein	Phvul.002G217100.1|PACid:27171146	50 kDa	0.37	21637	100	100	100	100	100	72.79
Ribosomal protein S1Unknownp/S2Unknowne family protein	Phvul.001G139900.1|PACid:27162563	14 kDa	0.37	3	0.1	0.1	0.1	0.1	0.1	10.6667		Clathrin light chain protein	Phvul.002G227200.1|PACid:27169935	35 kDa	0.37	100	100	3215.6	100	100	100	11.3853
Ribosomal protein L14p/L23e family protein	Phvul.001G164200.1|PACid:27162831 (+1)	15 kDa	0.37	0.1	0.1	0.1	6	0.1	0.1	0.0483871		NAD(P)-binding Rossmann-fold superfamily protein	Phvul.002G241100.1|PACid:27169058	66 kDa	0.37	100	11330	100	100	100	100	38.4333
GroES-like zinc-binding dehydrogenase family protein	Phvul.001G167100.1|PACid:27164087 (+1)	41 kDa	0.37	2	0.1	0.1	0.1	0.1	0.1	7.33333		translocon at the outer envelope membrane of chloroplasts 159	Phvul.002G246700.1|PACid:27169011	145 kDa	0.37	100	100	5483.7	100	100	100	18.9457
histone H4	Phvul.001G169200.1|PACid:27164686 (+11)	11 kDa	0.37	0.1	0.1	4	0.1	0.1	0.1	14		evolutionarily conserved C-terminal region 2	Phvul.002G247000.1|PACid:27168522	74 kDa	0.37	100	100	100	100	100	4522	0.0635324
Pyridoxal-dependent decarboxylase family protein	Phvul.001G177300.1|PACid:27164551	54 kDa	0.37	3	0.1	0.1	0.1	0.1	0.1	10.6667		Haloacid dehalogenase-like hydrolase (HAD) superfamily protein	Phvul.002G257400.1|PACid:27170278	34 kDa	0.37	100	27003	100	100	100	100	90.6767
ribosomal protein L2	Phvul.001G180400.1|PACid:27164062	15 kDa	0.37	3	0.1	0.1	0.1	0.1	0.1	10.6667		FK5Unknown6-binding protein 16-2	Phvul.002G262400.1|PACid:27169155 (+2)	23 kDa	0.37	100	46940	100	100	100	100	157.133
starch branching enzyme 2.2	Phvul.001G187600.1|PACid:27163434	99 kDa	0.37	0.1	4	0.1	0.1	0.1	0.1	14		Histone superfamily protein	Phvul.002G269200.1|PACid:27168833 (+6)	15 kDa	0.37	20482	100	100	100	100	100	68.94
Tubulin/FtsZ family protein	Phvul.001G189700.1|PACid:27164336	50 kDa	0.37	0.1	0.1	0.1	0.1	4	0.1	0.0714286		osmotin 34	Phvul.002G286600.1|PACid:27170781	24 kDa	0.37	100	100	14527	100	100	100	49.09
Ribosomal protein L19e family protein	Phvul.001G210100.1|PACid:27164432	25 kDa	0.37	3	0.1	0.1	0.1	0.1	0.1	10.6667		Nucleic acid-binding, OB-fold-like protein	Phvul.002G287600.1|PACid:27168248	82 kDa	0.37	100	100	100	19331	100	100	0.0153602
Photosystem II reaction center PsbP family protein	Phvul.001G224100.1|PACid:27163853	29 kDa	0.37	0.1	0.1	6	0.1	0.1	0.1	20.6667		ATP-dependent caseinolytic (Clp) protease/crotonase family protein	Phvul.002G314900.1|PACid:27169398	45 kDa	0.37	5314.7	100	100	100	100	100	18.3823
Protein of unknown function, DUF538	Phvul.001G224400.1|PACid:27164202	18 kDa	0.37	0.1	0.1	0.1	0.1	0.1	3	0.09375		Ribosomal protein S7e family protein	Phvul.002G317200.1|PACid:27168404 (+1)	22 kDa	0.37	20197	100	100	100	100	100	67.99
haloacid dehalogenase-like hydrolase family protein	Phvul.001G224700.1|PACid:27163351	116 kDa	0.37	0.1	0.1	0.1	3	0.1	0.1	0.09375		Ribosomal protein S19 family protein	Phvul.002G320200.1|PACid:27171246 (+2)	17 kDa	0.37	100	100	100	100	100	4282.8	0.0669225
Unknown	Phvul.001G252000.1|PACid:27162615	32 kDa	0.37	0.1	0.1	0.1	3	0.1	0.1	0.09375		Ribosomal protein S5 domain 2-like superfamily protein	Phvul.002G324300.1|PACid:27169399	17 kDa	0.37	18927	100	100	100	100	100	63.7567
Thioredoxin superfamily protein	Phvul.002G023500.1|PACid:27170374	29 kDa	0.37	0.1	2	0.1	0.1	0.1	0.1	7.33333		Peptidase M2Unknown/M25/M4Unknown family protein	Phvul.003G001200.1|PACid:27142394	51 kDa	0.37	100	100	14237	100	100	100	48.1233
O-acetylserine (thiol) lyase (OAS-TL) isoform A1	Phvul.002G045200.1|PACid:27170844	34 kDa	0.37	0.1	2	0.1	0.1	0.1	0.1	7.33333		Ribosomal protein L6 family protein	Phvul.003G025200.1|PACid:27143706	26 kDa	0.37	20735	100	100	100	100	100	69.7833
stress-inducible protein, putative	Phvul.002G060800.1|PACid:27170425	65 kDa	0.37	0.1	0.1	0.1	0.1	0.1	4	0.0714286		MLP-like protein 423	Phvul.003G109200.1|PACid:27143989 (+5)	16 kDa	0.37	100	100	29513	100	100	100	99.0433
Unknown	Phvul.002G069000.1|PACid:27170749	20 kDa	0.37	0.1	0.1	0.1	3	0.1	0.1	0.09375		eukaryotic translation initiation factor 4A1	Phvul.003G134800.1|PACid:27142123 (+1)	47 kDa	0.37	20271	100	100	100	100	100	68.2367
carbonic anhydrase 2	Phvul.002G071200.1|PACid:27169236 (+1)	30 kDa	0.37	0.1	0.1	0.1	0.1	5	0.1	0.0576923		MIF4G domain-containing protein / MA3 domain-containing protein	Phvul.003G154900.1|PACid:27143615	87 kDa	0.37	100	100	15331	100	100	100	51.77
pyruvate dehydrogenase complex E1 alpha subunit	Phvul.002G077600.1|PACid:27171151	43 kDa	0.37	0.1	5	0.1	0.1	0.1	0.1	17.3333		blue-copper-binding protein	Phvul.003G166500.1|PACid:27142914	18 kDa	0.37	100	100	20963	100	100	100	70.5433
Cyclophilin-like peptidyl-prolyl cis-trans isomerase family protein	Phvul.002G088300.1|PACid:27171333	25 kDa	0.37	0.1	0.1	3	0.1	0.1	0.1	10.6667		copper ion binding;electron carriers	Phvul.003G166700.1|PACid:27142355	35 kDa	0.37	100	100	18630	100	100	100	62.7667
Plastid-lipid associated protein PAP / fibrillin family protein	Phvul.002G137800.1|PACid:27168752	39 kDa	0.37	0.1	0.1	3	0.1	0.1	0.1	10.6667		Ribosomal protein S4	Phvul.003G191200.1|PACid:27143899 (+2)	23 kDa	0.37	22166	100	100	100	100	100	74.5533
alanine-2-oxoglutarate aminotransferase 2	Phvul.002G150800.1|PACid:27168605	54 kDa	0.37	0.1	6	0.1	0.1	0.1	0.1	20.6667		peroxin 14	Phvul.003G200200.1|PACid:27142144 (+2)	57 kDa	0.37	100	100	100	7326.8	100	100	0.0398576
Double Clp-N motif protein	Phvul.002G151400.1|PACid:27170113	26 kDa	0.37	0.1	0.1	0.1	0.1	2	0.1	0.136364		Ribosomal protein L18e/L15 superfamily protein	Phvul.003G204100.1|PACid:27144122	16 kDa	0.37	22676	100	100	100	100	100	76.2533
glutathione peroxidase 8	Phvul.002G157200.1|PACid:27170792	19 kDa	0.37	0.1	0.1	3	0.1	0.1	0.1	10.6667		Translation elongation factor EFG/EF2 protein	Phvul.003G217300.1|PACid:27143871	86 kDa	0.37	13541	100	100	100	100	100	45.8033
double-stranded DNA-binding family protein	Phvul.002G197500.1|PACid:27168531	15 kDa	0.37	0.1	0.1	3	0.1	0.1	0.1	10.6667		Subtilase family protein	Phvul.003G237300.1|PACid:27142189	84 kDa	0.37	100	100	15888	100	100	100	53.6267
ortholog of human splicing factor SC35	Phvul.002G208600.1|PACid:27169938 (+2)	31 kDa	0.37	3	0.1	0.1	0.1	0.1	0.1	10.6667		Late embryogenesis abundant protein, group 6	Phvul.003G237400.1|PACid:27142183	9 kDa	0.37	100	100	100	17242	100	100	0.0171999
MLP-like protein 423	Phvul.002G209400.1|PACid:27170360 (+1)	16 kDa	0.37	0.1	0.1	19	0.1	0.1	0.1	64		peptidylprolyl cis/trans isomerase, NIMA-interacting 1	Phvul.003G260800.1|PACid:27141914	13 kDa	0.37	100	22081	100	100	100	100	74.27
Cox19-like CHCH family protein	Phvul.002G214000.1|PACid:27170329	14 kDa	0.37	0.1	0.1	0.1	0.1	0.1	2	0.136364		Ribosomal protein L2 family	Phvul.003G261000.1|PACid:27143511 (+1)	28 kDa	0.37	100	100	15724	100	100	100	53.08
NAD(P)-linked oxidoreductase superfamily protein	Phvul.002G216600.1|PACid:27169853	34 kDa	0.37	3	0.1	0.1	0.1	0.1	0.1	10.6667		S phase kinase-associated protein 1	Phvul.003G265900.1|PACid:27144802	18 kDa	0.37	100	100	8060.4	100	100	100	27.5347
Pyridoxal phosphate (PLP)-dependent transferases superfamily protein	Phvul.002G217100.1|PACid:27171146	50 kDa	0.37	6	0.1	0.1	0.1	0.1	0.1	20.6667		biotin carboxyl carrier protein 2	Phvul.004G035000.2|PACid:27157060	28 kDa	0.37	100	100	100	100	100	8117.6	0.0360681
Clathrin light chain protein	Phvul.002G227200.1|PACid:27169935	35 kDa	0.37	0.1	0.1	6	0.1	0.1	0.1	20.6667		HIS triad family protein 3	Phvul.004G053100.1|PACid:27156937	17 kDa	0.37	100	100	11797	100	100	100	39.99
NAD(P)-binding Rossmann-fold superfamily protein	Phvul.002G241100.1|PACid:27169058	66 kDa	0.37	0.1	4	0.1	0.1	0.1	0.1	14		translocase of outer membrane 2Unknown kDa subunit 3	Phvul.004G072400.1|PACid:27156942	23 kDa	0.37	100	100	100	100	100	15297	0.0193586
translocon at the outer envelope membrane of chloroplasts 159	Phvul.002G246700.1|PACid:27169011	145 kDa	0.37	0.1	0.1	7	0.1	0.1	0.1	24		Calcium-dependent lipid-binding (CaLB domain) family protein	Phvul.004G110400.1|PACid:27157817	33 kDa	0.37	100	100	11730	100	100	100	39.7667
evolutionarily conserved C-terminal region 2	Phvul.002G247000.1|PACid:27168522	74 kDa	0.37	0.1	0.1	0.1	0.1	0.1	3	0.09375		Ribosomal protein L6 family	Phvul.004G116200.1|PACid:27156820	25 kDa	0.37	100	100	20721	100	100	100	69.7367
Haloacid dehalogenase-like hydrolase (HAD) superfamily protein	Phvul.002G257400.1|PACid:27170278	34 kDa	0.37	0.1	5	0.1	0.1	0.1	0.1	17.3333		pyrimidine 1	Phvul.004G148000.1|PACid:27156570	46 kDa	0.37	100	100	100	13723	100	100	0.0215471
FK5Unknown6-binding protein 16-2	Phvul.002G262400.1|PACid:27169155 (+2)	23 kDa	0.37	0.1	3	0.1	0.1	0.1	0.1	10.6667		Ribosomal L5P family protein	Phvul.005G011400.1|PACid:27149890 (+1)	21 kDa	0.37	20503	100	100	100	100	100	69.01
Histone superfamily protein	Phvul.002G269200.1|PACid:27168833 (+6)	15 kDa	0.37	3	0.1	0.1	0.1	0.1	0.1	10.6667		Mog1/PsbP/DUF1795-like photosystem II reaction center PsbP family protein	Phvul.005G020200.1|PACid:27149895	26 kDa	0.37	100	100	100	13620	100	100	0.0217077
osmotin 34	Phvul.002G286600.1|PACid:27170781	24 kDa	0.37	0.1	0.1	38	0.1	0.1	0.1	127.333		6UnknownS acidic ribosomal protein family	Phvul.005G104700.1|PACid:27148874 (+1)	16 kDa	0.37	100	100	100	11975	100	100	0.0246407
Nucleic acid-binding, OB-fold-like protein	Phvul.002G287600.1|PACid:27168248	82 kDa	0.37	0.1	0.1	0.1	5	0.1	0.1	0.0576923		PDI-like 1-4	Phvul.005G135600.1|PACid:27149283	63 kDa	0.37	3047.6	100	100	100	100	100	10.8253
ATP-dependent caseinolytic (Clp) protease/crotonase family protein	Phvul.002G314900.1|PACid:27169398	45 kDa	0.37	3	0.1	0.1	0.1	0.1	0.1	10.6667		NDH-dependent cyclic electron flow 1	Phvul.005G170200.1|PACid:27148383	23 kDa	0.37	100	100	100	16876	100	100	0.0175685
Ribosomal protein S7e family protein	Phvul.002G317200.1|PACid:27168404 (+1)	22 kDa	0.37	4	0.1	0.1	0.1	0.1	0.1	14		SHV3-like 2	Phvul.006G050400.1|PACid:27165410	71 kDa	0.37	100	100	100	100	100	18870	0.0157315
Ribosomal protein S19 family protein	Phvul.002G320200.1|PACid:27171246 (+2)	17 kDa	0.37	0.1	0.1	0.1	0.1	0.1	5	0.0576923		TBP-associated factor 15B	Phvul.006G072900.1|PACid:27165540	51 kDa	0.37	100	100	100	1797	100	100	0.150225
Ribosomal protein S5 domain 2-like superfamily protein	Phvul.002G324300.1|PACid:27169399	17 kDa	0.37	5	0.1	0.1	0.1	0.1	0.1	17.3333		peroxidase 2	Phvul.006G129600.1|PACid:27165136	38 kDa	0.37	100	100	100	100	100	24586	0.0121036
Peptidase M2Unknown/M25/M4Unknown family protein	Phvul.003G001200.1|PACid:27142394	51 kDa	0.37	0.1	0.1	2	0.1	0.1	0.1	7.33333		actin depolymerizing factor 3	Phvul.006G132700.1|PACid:27165655	16 kDa	0.37	100	100	8753.1	100	100	100	29.8437
Ribosomal protein L6 family protein	Phvul.003G025200.1|PACid:27143706	26 kDa	0.37	4	0.1	0.1	0.1	0.1	0.1	14		Ribosomal protein L18ae/LX family protein	Phvul.006G163400.1|PACid:27167130	21 kDa	0.37	10302	100	100	100	100	100	35.0067
MLP-like protein 423	Phvul.003G109200.1|PACid:27143989 (+5)	16 kDa	0.37	0.1	0.1	19	0.1	0.1	0.1	64		GDSL-like Lipase/Acylhydrolase superfamily protein	Phvul.006G169400.1|PACid:27165381	42 kDa	0.37	100	100	23368	100	100	100	78.56
eukaryotic translation initiation factor 4A1	Phvul.003G134800.1|PACid:27142123 (+1)	47 kDa	0.37	6	0.1	0.1	0.1	0.1	0.1	20.6667		Cysteine proteinases superfamily protein	Phvul.006G176800.1|PACid:27165555	16 kDa	0.37	100	100	22753	100	100	100	76.51
MIF4G domain-containing protein / MA3 domain-containing protein	Phvul.003G154900.1|PACid:27143615	87 kDa	0.37	0.1	0.1	2	0.1	0.1	0.1	7.33333		Ribosomal protein S6e	Phvul.006G184300.1|PACid:27165294	28 kDa	0.37	30359	100	100	100	100	100	101.863
blue-copper-binding protein	Phvul.003G166500.1|PACid:27142914	18 kDa	0.37	0.1	0.1	5	0.1	0.1	0.1	17.3333		UDP-glucosyl transferase 78D2	Phvul.006G201100.1|PACid:27166155	50 kDa	0.37	12707	100	100	100	100	100	43.0233
copper ion binding;electron carriers	Phvul.003G166700.1|PACid:27142355	35 kDa	0.37	0.1	0.1	3	0.1	0.1	0.1	10.6667		2Fe-2S ferredoxin-like superfamily protein	Phvul.006G216800.1|PACid:27167359	16 kDa	0.37	100	100	100	100	2734.9	100	0.102218
Ribosomal protein S4	Phvul.003G191200.1|PACid:27143899 (+2)	23 kDa	0.37	8	0.1	0.1	0.1	0.1	0.1	27.3333		chloroplast heat shock protein 7Unknown-2	Phvul.006G219500.1|PACid:27166164	74 kDa	0.37	100	100	100	14187	100	100	0.0208522
peroxin 14	Phvul.003G200200.1|PACid:27142144 (+2)	57 kDa	0.37	0.1	0.1	0.1	3	0.1	0.1	0.09375		DnaJ/Hsp4Unknown cysteine-rich domain superfamily protein	Phvul.007G006200.1|PACid:27159241	19 kDa	0.37	100	100	100	21608	100	100	0.0137564
Ribosomal protein L18e/L15 superfamily protein	Phvul.003G204100.1|PACid:27144122	16 kDa	0.37	6	0.1	0.1	0.1	0.1	0.1	20.6667		PTEN 2	Phvul.007G038300.1|PACid:27159803	68 kDa	0.37	100	100	6434.6	100	100	100	22.1153
Translation elongation factor EFG/EF2 protein	Phvul.003G217300.1|PACid:27143871	86 kDa	0.37	2	0.1	0.1	0.1	0.1	0.1	7.33333		thiazole biosynthetic enzyme, chloroplast (ARA6) (THI1) (THI4)	Phvul.007G052900.1|PACid:27160951	38 kDa	0.37	100	14587	100	100	100	100	49.29
Subtilase family protein	Phvul.003G237300.1|PACid:27142189	84 kDa	0.37	0.1	0.1	5	0.1	0.1	0.1	17.3333		Ribosomal protein S3Ae	Phvul.007G060700.1|PACid:27159612	30 kDa	0.37	100	100	9844.7	100	100	100	33.4823
Late embryogenesis abundant protein, group 6	Phvul.003G237400.1|PACid:27142183	9 kDa	0.37	0.1	0.1	0.1	2	0.1	0.1	0.136364		ribosomal protein 1	Phvul.007G081800.1|PACid:27159239	45 kDa	0.37	21776	100	100	100	100	100	73.2533
peptidylprolyl cis/trans isomerase, NIMA-interacting 1	Phvul.003G260800.1|PACid:27141914	13 kDa	0.37	0.1	4	0.1	0.1	0.1	0.1	14		RAB GTPase homolog G3A	Phvul.007G085200.1|PACid:27160795	23 kDa	0.37	100	100	100	6862.4	100	100	0.0424785
Ribosomal protein L2 family	Phvul.003G261000.1|PACid:27143511 (+1)	28 kDa	0.37	0.1	0.1	5	0.1	0.1	0.1	17.3333		Unknown	Phvul.007G091500.1|PACid:27159790	16 kDa	0.37	100	100	100	24108	100	100	0.0123416
S phase kinase-associated protein 1	Phvul.003G265900.1|PACid:27144802	18 kDa	0.37	0.1	0.1	2	0.1	0.1	0.1	7.33333		Unknown	Phvul.007G105600.1|PACid:27160650	15 kDa	0.37	100	100	100	7881.4	100	100	0.0371223
biotin carboxyl carrier protein 2	Phvul.004G035000.2|PACid:27157060	28 kDa	0.37	0.1	0.1	0.1	0.1	0.1	4	0.0714286		Plastid-lipid associated protein PAP / fibrillin family protein	Phvul.007G124100.1|PACid:27160607	29 kDa	0.37	100	15395	100	100	100	100	51.9833
HIS triad family protein 3	Phvul.004G053100.1|PACid:27156937	17 kDa	0.37	0.1	0.1	2	0.1	0.1	0.1	7.33333		ATPase, AAA-type, CDC48 protein	Phvul.007G149400.1|PACid:27158515 (+1)	90 kDa	0.37	23105	100	100	100	100	100	77.6833
translocase of outer membrane 2Unknown kDa subunit 3	Phvul.004G072400.1|PACid:27156942	23 kDa	0.37	0.1	0.1	0.1	0.1	0.1	2	0.136364		Ribosomal protein L4/L1 family	Phvul.007G162900.1|PACid:27159061	45 kDa	0.37	19115	100	100	100	100	100	64.3833
Calcium-dependent lipid-binding (CaLB domain) family protein	Phvul.004G110400.1|PACid:27157817	33 kDa	0.37	0.1	0.1	3	0.1	0.1	0.1	10.6667		RNA-binding KH domain-containing protein	Phvul.007G178400.1|PACid:27161424	63 kDa	0.37	100	100	100	100	100	8510.8	0.03444
Ribosomal protein L6 family	Phvul.004G116200.1|PACid:27156820	25 kDa	0.37	0.1	0.1	6	0.1	0.1	0.1	20.6667		ATP citrate lyase (ACL) family protein	Phvul.007G190800.1|PACid:27160158	45 kDa	0.37	100	100	17492	100	100	100	58.9733
pyrimidine 1	Phvul.004G148000.1|PACid:27156570	46 kDa	0.37	0.1	0.1	0.1	2	0.1	0.1	0.136364		regulatory particle triple-A ATPase 5A	Phvul.007G197100.1|PACid:27160080	47 kDa	0.37	100	100	100	100	100	15766	0.0187899
Ribosomal L5P family protein	Phvul.005G011400.1|PACid:27149890 (+1)	21 kDa	0.37	3	0.1	0.1	0.1	0.1	0.1	10.6667		FKBP-like peptidyl-prolyl cis-trans isomerase family protein	Phvul.007G225600.1|PACid:27158652	25 kDa	0.37	100	10924	100	100	100	100	37.08
Mog1/PsbP/DUF1795-like photosystem II reaction center PsbP family protein	Phvul.005G020200.1|PACid:27149895	26 kDa	0.37	0.1	0.1	0.1	5	0.1	0.1	0.0576923		RNA-binding (RRM/RBD/RNP motifs) family protein	Phvul.007G231600.1|PACid:27159497	31 kDa	0.37	100	100	25731	100	100	100	86.4367
6UnknownS acidic ribosomal protein family	Phvul.005G104700.1|PACid:27148874 (+1)	16 kDa	0.37	0.1	0.1	0.1	3	0.1	0.1	0.09375		Single hybrid motif superfamily protein	Phvul.007G233300.1|PACid:27158913	20 kDa	0.37	100	100	8931.6	100	100	100	30.4387
PDI-like 1-4	Phvul.005G135600.1|PACid:27149283	63 kDa	0.37	3	0.1	0.1	0.1	0.1	0.1	10.6667		Proteinase inhibitor, propeptide	Phvul.007G245700.1|PACid:27161164	14 kDa	0.37	100	100	100	12884	100	100	0.0229288
NDH-dependent cyclic electron flow 1	Phvul.005G170200.1|PACid:27148383	23 kDa	0.37	0.1	0.1	0.1	5	0.1	0.1	0.0576923		Transketolase family protein	Phvul.008G000800.1|PACid:27154521	39 kDa	0.37	100	10826	100	100	100	100	36.7533
SHV3-like 2	Phvul.006G050400.1|PACid:27165410	71 kDa	0.37	0.1	0.1	0.1	0.1	0.1	3	0.09375		general regulatory factor 3	Phvul.008G004300.1|PACid:27155699 (+1)	29 kDa	0.37	11813	100	100	100	100	100	40.0433
TBP-associated factor 15B	Phvul.006G072900.1|PACid:27165540	51 kDa	0.37	0.1	0.1	0.1	2	0.1	0.1	0.136364		Bifunctional inhibitor/lipid-transfer protein/seed storage 2S albumin superfamily protein	Phvul.008G008200.1|PACid:27154166	10 kDa	0.37	100	100	100	32840	100	100	0.0090799
peroxidase 2	Phvul.006G129600.1|PACid:27165136	38 kDa	0.37	0.1	0.1	0.1	0.1	0.1	3	0.09375		PsbP-like protein 1	Phvul.008G015100.1|PACid:27153440	27 kDa	0.37	100	100	14459	100	100	100	48.8633
actin depolymerizing factor 3	Phvul.006G132700.1|PACid:27165655	16 kDa	0.37	0.1	0.1	3	0.1	0.1	0.1	10.6667		voltage dependent anion channel 1	Phvul.008G043800.1|PACid:27155470	30 kDa	0.37	100	16677	100	100	100	100	56.2567
Ribosomal protein L18ae/LX family protein	Phvul.006G163400.1|PACid:27167130	21 kDa	0.37	4	0.1	0.1	0.1	0.1	0.1	14		2-phosphoglycolate phosphatase 1	Phvul.008G051700.1|PACid:27154549	41 kDa	0.37	100	100	100	100	100	27893	0.0106788
GDSL-like Lipase/Acylhydrolase superfamily protein	Phvul.006G169400.1|PACid:27165381	42 kDa	0.37	0.1	0.1	5	0.1	0.1	0.1	17.3333		mitochondrial acyl carrier protein 2	Phvul.008G052400.1|PACid:27154153	14 kDa	0.37	100	100	25933	100	100	100	87.11
Cysteine proteinases superfamily protein	Phvul.006G176800.1|PACid:27165555	16 kDa	0.37	0.1	0.1	5	0.1	0.1	0.1	17.3333		phosphomannomutase	Phvul.008G068100.1|PACid:27155643	28 kDa	0.37	100	100	100	100	100	20741	0.014326
Ribosomal protein S6e	Phvul.006G184300.1|PACid:27165294	28 kDa	0.37	6	0.1	0.1	0.1	0.1	0.1	20.6667		elongation factor P (EF-P) family protein	Phvul.008G082900.1|PACid:27154982	26 kDa	0.37	100	14195	100	100	100	100	47.9833
UDP-glucosyl transferase 78D2	Phvul.006G201100.1|PACid:27166155	50 kDa	0.37	6	0.1	0.1	0.1	0.1	0.1	20.6667		Mitochondrial glycoprotein family protein	Phvul.008G115200.1|PACid:27155468	28 kDa	0.37	2600.2	100	100	100	100	100	9.334
2Fe-2S ferredoxin-like superfamily protein	Phvul.006G216800.1|PACid:27167359	16 kDa	0.37	0.1	0.1	0.1	0.1	3	0.1	0.09375		general regulatory factor 2	Phvul.008G162500.1|PACid:27154327	29 kDa	0.37	8310.7	100	100	100	100	100	28.369
chloroplast heat shock protein 7Unknown-2	Phvul.006G219500.1|PACid:27166164	74 kDa	0.37	0.1	0.1	0.1	26	0.1	0.1	0.0114504		Unknown	Phvul.008G203100.1|PACid:27154593 (+1)	13 kDa	0.37	100	100	100	16986	100	100	0.0174561
DnaJ/Hsp4Unknown cysteine-rich domain superfamily protein	Phvul.007G006200.1|PACid:27159241	19 kDa	0.37	0.1	0.1	0.1	4	0.1	0.1	0.0714286		Subtilisin-like serine endopeptidase family protein	Phvul.008G229400.1|PACid:27155274	74 kDa	0.37	100	100	100	100	100	30988	0.00961908
PTEN 2	Phvul.007G038300.1|PACid:27159803	68 kDa	0.37	0.1	0.1	3	0.1	0.1	0.1	10.6667		high mobility group A	Phvul.008G236000.1|PACid:27155653	19 kDa	0.37	14657	100	100	100	100	100	49.5233
thiazole biosynthetic enzyme, chloroplast (ARA6) (THI1) (THI4)	Phvul.007G052900.1|PACid:27160951	38 kDa	0.37	0.1	4	0.1	0.1	0.1	0.1	14		eukaryotic translation initiation factor 2 beta subunit	Phvul.008G246100.1|PACid:27156325	30 kDa	0.37	100	100	12380	100	100	100	41.9333
Ribosomal protein S3Ae	Phvul.007G060700.1|PACid:27159612	30 kDa	0.37	0.1	0.1	2	0.1	0.1	0.1	7.33333		tubulin folding cofactor A (KIESEL)	Phvul.008G274500.1|PACid:27155300	13 kDa	0.37	100	100	16220	100	100	100	54.7333
ribosomal protein 1	Phvul.007G081800.1|PACid:27159239	45 kDa	0.37	2	0.1	0.1	0.1	0.1	0.1	7.33333		HEAT SHOCK PROTEIN 81.4	Phvul.008G281400.1|PACid:27156117	80 kDa	0.37	30470	100	100	100	100	100	102.233
RAB GTPase homolog G3A	Phvul.007G085200.1|PACid:27160795	23 kDa	0.37	0.1	0.1	0.1	2	0.1	0.1	0.136364		Subtilisin-like serine endopeptidase family protein	Phvul.009G018600.1|PACid:27147831	81 kDa	0.37	100	12157	100	100	100	100	41.19
Unknown	Phvul.007G091500.1|PACid:27159790	16 kDa	0.37	0.1	0.1	0.1	6	0.1	0.1	0.0483871		Ribosomal protein L6 family	Phvul.009G039400.1|PACid:27147144	22 kDa	0.37	20192	100	100	100	100	100	67.9733
Unknown	Phvul.007G105600.1|PACid:27160650	15 kDa	0.37	0.1	0.1	0.1	3	0.1	0.1	0.09375		Unknown	Phvul.009G043000.1|PACid:27147756	6 kDa	0.37	100	100	100	15542	100	100	0.0190573
Plastid-lipid associated protein PAP / fibrillin family protein	Phvul.007G124100.1|PACid:27160607	29 kDa	0.37	0.1	5	0.1	0.1	0.1	0.1	17.3333		ribulose-bisphosphate carboxylases	Phvul.009G144500.1|PACid:27148212	29 kDa	0.37	29111	100	100	100	100	100	97.7033
ATPase, AAA-type, CDC48 protein	Phvul.007G149400.1|PACid:27158515 (+1)	90 kDa	0.37	4	0.1	0.1	0.1	0.1	0.1	14		plasmodesmata callose-binding protein 3	Phvul.009G192000.1|PACid:27147835	25 kDa	0.37	100	100	100	100	100	18762	0.0158211
Ribosomal protein L4/L1 family	Phvul.007G162900.1|PACid:27159061	45 kDa	0.37	6	0.1	0.1	0.1	0.1	0.1	20.6667		Tetratricopeptide repeat (TPR)-like superfamily protein	Phvul.009G195600.1|PACid:27146782 (+2)	198 kDa	0.37	100	100	100	100	11256	100	0.0261872
RNA-binding KH domain-containing protein	Phvul.007G178400.1|PACid:27161424	63 kDa	0.37	0.1	0.1	0.1	0.1	0.1	2	0.136364		Co-chaperone GrpE family protein	Phvul.009G196500.1|PACid:27145485	33 kDa	0.37	100	100	100	100	100	8119.5	0.0360599
ATP citrate lyase (ACL) family protein	Phvul.007G190800.1|PACid:27160158	45 kDa	0.37	0.1	0.1	4	0.1	0.1	0.1	14		adenylate kinase family protein	Phvul.009G208900.1|PACid:27147986	67 kDa	0.37	100	8002.4	100	100	100	100	27.3413
regulatory particle triple-A ATPase 5A	Phvul.007G197100.1|PACid:27160080	47 kDa	0.37	0.1	0.1	0.1	0.1	0.1	3	0.09375		Transducin family protein / WD-4Unknown repeat family protein	Phvul.009G232200.1|PACid:27147801	56 kDa	0.37	100	100	100	100	100	11244	0.0262146
FKBP-like peptidyl-prolyl cis-trans isomerase family protein	Phvul.007G225600.1|PACid:27158652	25 kDa	0.37	0.1	4	0.1	0.1	0.1	0.1	14		plasma-membrane associated cation-binding protein 1	Phvul.009G245700.1|PACid:27147901	23 kDa	0.37	100	3580.8	100	100	100	100	12.6027
RNA-binding (RRM/RBD/RNP motifs) family protein	Phvul.007G231600.1|PACid:27159497	31 kDa	0.37	0.1	0.1	5	0.1	0.1	0.1	17.3333		Ribosomal protein S8e family protein	Phvul.010G024600.1|PACid:27140318	25 kDa	0.37	10520	100	100	100	100	100	35.7333
Single hybrid motif superfamily protein	Phvul.007G233300.1|PACid:27158913	20 kDa	0.37	0.1	0.1	8	0.1	0.1	0.1	27.3333		ATPase, F1 complex, delta/epsilon subunit	Phvul.010G042900.1|PACid:27141258	21 kDa	0.37	100	100	53681	100	100	100	179.603
Proteinase inhibitor, propeptide	Phvul.007G245700.1|PACid:27161164	14 kDa	0.37	0.1	0.1	0.1	5	0.1	0.1	0.0576923		ribosomal protein L4	Phvul.010G048100.1|PACid:27140429	34 kDa	0.37	100	100	34753	100	100	100	116.51
Transketolase family protein	Phvul.008G000800.1|PACid:27154521	39 kDa	0.37	0.1	3	0.1	0.1	0.1	0.1	10.6667		lipid transfer protein 3	Phvul.010G069100.1|PACid:27141617	12 kDa	0.37	100	14794	100	100	100	100	49.98
general regulatory factor 3	Phvul.008G004300.1|PACid:27155699 (+1)	29 kDa	0.37	5	0.1	0.1	0.1	0.1	0.1	17.3333		Unknown	Phvul.010G094000.1|PACid:27141474	26 kDa	0.37	100	100	100	13291	100	100	0.022237
Bifunctional inhibitor/lipid-transfer protein/seed storage 2S albumin superfamily protein	Phvul.008G008200.1|PACid:27154166	10 kDa	0.37	0.1	0.1	0.1	5	0.1	0.1	0.0576923		glyoxylate reductase 1	Phvul.010G109500.1|PACid:27140222	31 kDa	0.37	100	100	100	100	18238	100	0.0162707
PsbP-like protein 1	Phvul.008G015100.1|PACid:27153440	27 kDa	0.37	0.1	0.1	8	0.1	0.1	0.1	27.3333		photosystem I P subunit	Phvul.010G120100.1|PACid:27140391	18 kDa	0.37	100	100	10098.9	100	100	100	34.3297
voltage dependent anion channel 1	Phvul.008G043800.1|PACid:27155470	30 kDa	0.37	0.1	2	0.1	0.1	0.1	0.1	7.33333		germin-like protein 1	Phvul.010G129900.1|PACid:27140700	22 kDa	0.37	100	100	100	28385	100	100	0.010495
2-phosphoglycolate phosphatase 1	Phvul.008G051700.1|PACid:27154549	41 kDa	0.37	0.1	0.1	0.1	0.1	0.1	4	0.0714286		Isochorismatase family protein	Phvul.010G147700.1|PACid:27141488	30 kDa	0.37	100	100	11106	100	100	100	37.6867
mitochondrial acyl carrier protein 2	Phvul.008G052400.1|PACid:27154153	14 kDa	0.37	0.1	0.1	7	0.1	0.1	0.1	24		Unknown	Phvul.011G024500.1|PACid:27150936	154 kDa	0.37	100	100	10264	100	100	100	34.88
phosphomannomutase	Phvul.008G068100.1|PACid:27155643	28 kDa	0.37	0.1	0.1	0.1	0.1	0.1	4	0.0714286		RAB GTPase homolog A2B	Phvul.011G061100.1|PACid:27151920	24 kDa	0.37	100	100	15535	100	100	100	52.45
elongation factor P (EF-P) family protein	Phvul.008G082900.1|PACid:27154982	26 kDa	0.37	0.1	4	0.1	0.1	0.1	0.1	14		lumazine-binding family protein	Phvul.011G114100.1|PACid:27151172	30 kDa	0.37	19178	100	100	100	100	100	64.5933
Mitochondrial glycoprotein family protein	Phvul.008G115200.1|PACid:27155468	28 kDa	0.37	2	0.1	0.1	0.1	0.1	0.1	7.33333		thioredoxin M-type 4	Phvul.011G157700.1|PACid:27151243	19 kDa	0.37	100	100	100	15402	100	100	0.0192283
general regulatory factor 2	Phvul.008G162500.1|PACid:27154327	29 kDa	0.37	6	0.1	0.1	0.1	0.1	0.1	20.6667		kunitz trypsin inhibitor 1	Phvul.011G169800.1|PACid:27151630	23 kDa	0.37	100	100	8084.4	100	100	100	27.6147
Unknown	Phvul.008G203100.1|PACid:27154593 (+1)	13 kDa	0.37	0.1	0.1	0.1	3	0.1	0.1	0.09375		Eukaryotic aspartyl protease family protein	Phvul.011G206100.1|PACid:27151368	47 kDa	0.37	100	100	100	100	100	16679	0.0177736
Subtilisin-like serine endopeptidase family protein	Phvul.008G229400.1|PACid:27155274	74 kDa	0.37	0.1	0.1	0.1	0.1	0.1	17	0.0174419		Ubiquitin-activating enzyme active site	REVERSE_Phvul.006G072200.1|PACid:27167354-DECOY (+1)	121 kDa	0.37	100	100	20195	100	100	100	67.9833
high mobility group A	Phvul.008G236000.1|PACid:27155653	19 kDa	0.37	3	0.1	0.1	0.1	0.1	0.1	10.6667		RNA polymerase Rpb1, domain 2	REVERSE_Phvul.011G206900.1|PACid:27152868-DECOY	227 kDa	0.37	100	19107	100	100	100	100	64.3567
eukaryotic translation initiation factor 2 beta subunit	Phvul.008G246100.1|PACid:27156325	30 kDa	0.37	0.1	0.1	4	0.1	0.1	0.1	14		glyceraldehyde-3-phosphate dehydrogenase B subunit	Phvul.009G006600.1|PACid:27147865	48 kDa	0.37	30377	22991	21796	23918	17383	23466	1.16053
tubulin folding cofactor A (KIESEL)	Phvul.008G274500.1|PACid:27155300	13 kDa	0.37	0.1	0.1	3	0.1	0.1	0.1	10.6667		photosystem I P subunit	Phvul.009G258500.1|PACid:27146197	19 kDa	0.37	23742	27465	100	17704	32831	30305	0.634673
HEAT SHOCK PROTEIN 81.4	Phvul.008G281400.1|PACid:27156117	80 kDa	0.37	8	0.1	0.1	0.1	0.1	0.1	27.3333		Concanavalin A-like lectin protein kinase family protein	Phvul.007G070300.1|PACid:27160454	33 kDa	0.37	100	8010.7	100	12958	9322.2	100	0.366873
Subtilisin-like serine endopeptidase family protein	Phvul.009G018600.1|PACid:27147831	81 kDa	0.37	0.1	3	0.1	0.1	0.1	0.1	10.6667		methionine sulfoxide reductase B 2	Phvul.006G198700.1|PACid:27166655	21 kDa	0.37	100	100	10600	15565	100	13119	0.375208
Ribosomal protein L6 family	Phvul.009G039400.1|PACid:27147144	22 kDa	0.37	7	0.1	0.1	0.1	0.1	0.1	24		Heavy metal transport/detoxification superfamily protein	Phvul.004G019800.1|PACid:27157513	19 kDa	0.37	21614	24746	22192	21404	25159	29967	0.895753
Unknown	Phvul.009G043000.1|PACid:27147756	6 kDa	0.37	0.1	0.1	0.1	4	0.1	0.1	0.0714286		Ribosomal protein L7Ae/L3Unknowne/S12e/Gadd45 family protein	Phvul.008G269000.1|PACid:27156013	14 kDa	0.37	18159	100	7551.5	18031	17510	8579.1	0.585005
ribulose-bisphosphate carboxylases	Phvul.009G144500.1|PACid:27148212	29 kDa	0.37	3	0.1	0.1	0.1	0.1	0.1	10.6667		Cobalamin-independent synthase family protein	Phvul.001G113800.1|PACid:27163218	84 kDa	0.38	28975	12747	27206	18623	15586	19208	1.29038
plasmodesmata callose-binding protein 3	Phvul.009G192000.1|PACid:27147835	25 kDa	0.37	0.1	0.1	0.1	0.1	0.1	4	0.0714286		3UnknownS ribosomal protein, putative	Phvul.009G045100.1|PACid:27147476	37 kDa	0.38	10445	15629	16345	100	12996	14558	1.53392
Tetratricopeptide repeat (TPR)-like superfamily protein	Phvul.009G195600.1|PACid:27146782 (+2)	198 kDa	0.37	0.1	0.1	0.1	0.1	3	0.1	0.09375		adenine phosphoribosyl transferase 1	Phvul.009G070900.1|PACid:27146925	27 kDa	0.38	14574	21042	20147	100	13493	22141	1.5605
Co-chaperone GrpE family protein	Phvul.009G196500.1|PACid:27145485	33 kDa	0.37	0.1	0.1	0.1	0.1	0.1	3	0.09375		Phosphoglycerate kinase family protein	Phvul.005G050700.1|PACid:27148804	50 kDa	0.38	22207	20972	25400	21842	19284	22554	1.07693
adenylate kinase family protein	Phvul.009G208900.1|PACid:27147986	67 kDa	0.37	0.1	2	0.1	0.1	0.1	0.1	7.33333		Mog1/PsbP/DUF1795-like photosystem II reaction center PsbP family protein	Phvul.009G134500.1|PACid:27147631	29 kDa	0.38	19446	7956.5	9524.2	11028	4658	9120.6	1.48858
Transducin family protein / WD-4Unknown repeat family protein	Phvul.009G232200.1|PACid:27147801	56 kDa	0.37	0.1	0.1	0.1	0.1	0.1	3	0.09375		Unknown	Phvul.010G014200.1|PACid:27141106	21 kDa	0.38	12234	100	13895	29378	100	27044	0.464049
plasma-membrane associated cation-binding protein 1	Phvul.009G245700.1|PACid:27147901	23 kDa	0.37	0.1	2	0.1	0.1	0.1	0.1	7.33333		CP12 domain-containing protein 2	Phvul.007G214200.1|PACid:27161496	14 kDa	0.39	10592	14165	8006.6	10040	7374.8	9642	1.21092
Ribosomal protein S8e family protein	Phvul.010G024600.1|PACid:27140318	25 kDa	0.37	5	0.1	0.1	0.1	0.1	0.1	17.3333		Quinone reductase family protein	Phvul.002G219700.1|PACid:27170433	22 kDa	0.39	100	14128	15731	12498	14070	18912	0.658729
ATPase, F1 complex, delta/epsilon subunit	Phvul.010G042900.1|PACid:27141258	21 kDa	0.37	0.1	0.1	3	0.1	0.1	0.1	10.6667		Unknown	Phvul.006G082200.1|PACid:27166837	27 kDa	0.39	34490	20597	26599	100	26537	26733	1.53056
ribosomal protein L4	Phvul.010G048100.1|PACid:27140429	34 kDa	0.37	0.1	0.1	4	0.1	0.1	0.1	14		Chaperone protein htpG family protein	Phvul.001G005200.1|PACid:27163885	94 kDa	0.39	13430	100	7792.9	100	100	7785.8	2.6701
lipid transfer protein 3	Phvul.010G069100.1|PACid:27141617	12 kDa	0.37	0.1	7	0.1	0.1	0.1	0.1	24		Ankyrin repeat family protein	Phvul.006G038600.1|PACid:27166813	19 kDa	0.39	100	9431	17503	18662	10082.5	14408	0.626476
Unknown	Phvul.010G094000.1|PACid:27141474	26 kDa	0.37	0.1	0.1	0.1	6	0.1	0.1	0.0483871		glyceraldehyde-3-phosphate dehydrogenase C2	Phvul.009G168400.1|PACid:27146643	40 kDa	0.4	20414	13607	19939	100	16890	18871	1.5047
glyoxylate reductase 1	Phvul.010G109500.1|PACid:27140222	31 kDa	0.37	0.1	0.1	0.1	0.1	2	0.1	0.136364		Glycosyl hydrolase superfamily protein	Phvul.011G177000.1|PACid:27152442	37 kDa	0.4	25682	12510	25980	100	100	31788	2.00613
photosystem I P subunit	Phvul.010G120100.1|PACid:27140391	18 kDa	0.37	0.1	0.1	3	0.1	0.1	0.1	10.6667		Heat shock protein 7Unknown (Hsp 7Unknown) family protein	Phvul.002G301400.1|PACid:27167727	73 kDa	0.4	15353	6033.3	17883	100	6192.6	16339	1.73515
germin-like protein 1	Phvul.010G129900.1|PACid:27140700	22 kDa	0.37	0.1	0.1	0.1	9	0.1	0.1	0.0326087		sedoheptulose-bisphosphatase	Phvul.001G240200.1|PACid:27164106	42 kDa	0.4	19633	34862	28868	16242	28058	23298	1.23322
Isochorismatase family protein	Phvul.010G147700.1|PACid:27141488	30 kDa	0.37	0.1	0.1	2	0.1	0.1	0.1	7.33333		glutathione peroxidase 1	Phvul.001G041100.1|PACid:27162927	30 kDa	0.41	100	21828	100	28420	24854	100	0.41271
Unknown	Phvul.011G024500.1|PACid:27150936	154 kDa	0.37	0.1	0.1	7	0.1	0.1	0.1	24		chloroplast RNA-binding protein 31B	Phvul.003G206700.1|PACid:27144868	34 kDa	0.41	17611	20991	22964	34324	22814	18252	0.816634
RAB GTPase homolog A2B	Phvul.011G061100.1|PACid:27151920	24 kDa	0.37	0.1	0.1	6	0.1	0.1	0.1	20.6667		NADP-malic enzyme 4	Phvul.004G170800.1|PACid:27157719	65 kDa	0.42	25631	100	19311	100	100	18598	2.39611
lumazine-binding family protein	Phvul.011G114100.1|PACid:27151172	30 kDa	0.37	5	0.1	0.1	0.1	0.1	0.1	17.3333		uracil phosphoribosyltransferase	Phvul.010G015300.1|PACid:27140500	31 kDa	0.42	100	100	12558	18042	100	12800	0.41232
thioredoxin M-type 4	Phvul.011G157700.1|PACid:27151243	19 kDa	0.37	0.1	0.1	0.1	8	0.1	0.1	0.0365854		Ribosomal protein L21	Phvul.007G089400.1|PACid:27159913	24 kDa	0.42	13017	100	100	100	20886	12141	0.39898
kunitz trypsin inhibitor 1	Phvul.011G169800.1|PACid:27151630	23 kDa	0.37	0.1	0.1	2	0.1	0.1	0.1	7.33333		Oxidoreductase, zinc-binding dehydrogenase family protein	Phvul.008G151800.1|PACid:27154209	34 kDa	0.42	20499	22018	27016	18228	24604	19148	1.12186
Eukaryotic aspartyl protease family protein	Phvul.011G206100.1|PACid:27151368	47 kDa	0.37	0.1	0.1	0.1	0.1	0.1	9	0.0326087		ferredoxin-NADP(+)-oxidoreductase 2	Phvul.002G108000.1|PACid:27167711	41 kDa	0.42	14759	13212	17589	3274.5	12183	18055	1.35949
Ubiquitin-activating enzyme active site	REVERSE_Phvul.006G072200.1|PACid:27167354-DECOY (+1)	121 kDa	0.37	0.1	0.1	3	0.1	0.1	0.1	10.6667		PDI-like 1-2	Phvul.009G126800.1|PACid:27147260	58 kDa	0.43	18939	10341	14506	8273	14749	12602	1.22912
RNA polymerase Rpb1, domain 2	REVERSE_Phvul.011G206900.1|PACid:27152868-DECOY	227 kDa	0.37	0.1	2	0.1	0.1	0.1	0.1	7.33333		aleurain-like protease	Phvul.009G227100.1|PACid:27148097	39 kDa	0.43	15594	13922	15050	18089	13793	16166	0.927531
WPP domain protein 2	Phvul.009G068700.1|PACid:27145715	17 kDa	0.37	0.1	0.1	2	2	0.1	4	0.360656		WPP domain protein 2	Phvul.009G068700.1|PACid:27145715	17 kDa	0.43	100	100	5921.4	7496.5	100	6422.1	0.436663
CAX interacting protein 1	Phvul.008G055800.1|PACid:27153099	20 kDa	0.37	9	9	7	7	11	12	0.833333		ATP synthase D chain, mitochondrial	Phvul.007G092100.1|PACid:27159460	20 kDa	0.43	25026	20160	18383	20038	23766	27637	0.889811
ribosomal protein 5B	Phvul.005G107000.1|PACid:27150398	23 kDa	0.38	11	0.1	6	0.1	0.1	6	2.75806		RmlC-like cupins superfamily protein	Phvul.007G113400.1|PACid:27159828	11 kDa	0.43	10139	10535	14078	14196	12551	11814	0.901221
Single hybrid motif superfamily protein	Phvul.002G006000.1|PACid:27171133	18 kDa	0.38	17	26	23	30	28	20	0.846154		26S proteasome regulatory complex, non-ATPase subcomplex, Rpn2/Psmd1 subunit	Phvul.002G324700.1|PACid:27170952	109 kDa	0.43	100	100	2967.8	3244.2	100	3669.8	0.45164
Subtilisin-like serine endopeptidase family protein	Phvul.008G229500.1|PACid:27155948	76 kDa	0.39	14	30	12	21	22	33	0.736842		early nodulin-like protein 1	Phvul.005G073200.1|PACid:27149914	46 kDa	0.44	8219.5	8962.4	16761	100	100	17284	1.94137
glyceraldehyde-3-phosphate dehydrogenase B subunit	Phvul.009G006600.1|PACid:27147865	48 kDa	0.39	30	49	31	36	31	21	1.25		plastid transcriptionally active 4	Phvul.008G099200.1|PACid:27154097 (+1)	36 kDa	0.44	28265	30268	27445	31533	100	28604	1.42733
Remorin family protein	Phvul.004G116700.1|PACid:27157927	22 kDa	0.39	11	18	7	18	14	14	0.782609		FK5Unknown6- and rapamycin-binding protein 15 kD-2	Phvul.010G024400.1|PACid:27140309	17 kDa	0.44	100	100	19745	20565	100	25379	0.433173
lipid transfer protein 1	Phvul.010G066400.1|PACid:27140848	12 kDa	0.39	18	14	16	18	8	13	1.23077		protein containing PDZ domain, a K-box domain, and a TPR region	Phvul.002G247200.1|PACid:27167565	37 kDa	0.44	18262	17683	10578	17733	13393	29149	0.771846
neurofilament protein-related	Phvul.007G206100.1|PACid:27160092 (+1)	105 kDa	0.4	4	14	8	9	2	5	1.625		ADP-ribosylation factor A1F	Phvul.001G215400.1|PACid:27162755 (+4)	21 kDa	0.44	20786	100	18333	100	6227.4	13297	1.99848
DnaJ/Hsp4Unknown cysteine-rich domain superfamily protein	Phvul.001G007500.1|PACid:27162776	17 kDa	0.4	0.1	0.1	6	4	2	7	0.476923		endoribonuclease L-PSP family protein	Phvul.006G043400.1|PACid:27166401	20 kDa	0.44	14067	10290	100	24032	100	22858	0.520472
Aconitase/3-isopropylmalate dehydratase protein	Phvul.010G153800.1|PACid:27140298	27 kDa	0.4	3	7	10	0.1	6	6	1.65289		D-mannose binding lectin protein with Apple-like carbohydrate-binding domain	Phvul.005G066000.1|PACid:27150055	50 kDa	0.45	35864	36291	44023	28034	36127	40548	1.10953
Dihydrolipoamide succinyltransferase	Phvul.008G269300.1|PACid:27153844	50 kDa	0.4	6	8	4	3	3	7	1.38462		Plant basic secretory protein (BSP) family protein	Phvul.007G040900.1|PACid:27160861	25 kDa	0.45	17142	100	18230	100	100	15483	2.26181
pyrophosphorylase 6	Phvul.006G198500.1|PACid:27167321	32 kDa	0.4	7	8	24	21	17	17	0.709091		high cyclic electron flow 1	Phvul.008G112000.1|PACid:27156195	44 kDa	0.45	22430	25891	24184	26839	22029	30035	0.918913
O-acetylserine (thiol) lyase isoform C	Phvul.003G060200.1|PACid:27141782	35 kDa	0.41	15	20	13	17	13	10	1.2		Ribose 5-phosphate isomerase, type A protein	Phvul.006G100600.1|PACid:27165968	30 kDa	0.45	19827	28234	23593	22185	18785	23660	1.10868
photosystem I subunit E-2	Phvul.007G155500.1|PACid:27161570	14 kDa	0.41	13	20	11	9	11	15	1.25714		Leucine-rich repeat (LRR) family protein	Phvul.002G092200.1|PACid:27169164	50 kDa	0.46	18205	20791	25183	19723	100	25140	1.42737
RAN GTPase 3	Phvul.009G095400.1|PACid:27146252 (+2)	25 kDa	0.42	4	0.1	6	12	3	4	0.531579		Uncharacterised BCR, YbaB family COGUnknown718	Phvul.005G005700.1|PACid:27150107	21 kDa	0.47	100	13368	10803	12796	9293.6	12333	0.705089
Calcium-binding EF-hand family protein	Phvul.002G060300.1|PACid:27167863	16 kDa	0.42	4	5	7	7	5	7	0.842105		Lactate/malate dehydrogenase family protein	Phvul.007G273500.1|PACid:27159288	35 kDa	0.47	13462	10744	11833	100	12135	13444	1.40344
Chaperone protein htpG family protein	Phvul.001G005200.1|PACid:27163885	94 kDa	0.42	8	0.1	2	0.1	0.1	3	3.15625		Ribulose bisphosphate carboxylase (small chain) family protein	Phvul.004G064800.1|PACid:27157331 (+1)	20 kDa	0.48	33194	30848	22873	24107	19864	32003	1.14401
Ankyrin repeat family protein	Phvul.006G038600.1|PACid:27166813	19 kDa	0.42	0.1	3	6	4	6	4	0.65		Unknown	Phvul.006G065100.1|PACid:27165277	10 kDa	0.48	100	15858	25791	19100	16374	24703	0.69377
Unknown	Phvul.006G159000.1|PACid:27166926	36 kDa	0.42	0.1	2	0.1	3	0.1	2	0.431373		ubiquitin E2 variant 1D-4	Phvul.007G270100.1|PACid:27158769	17 kDa	0.48	26186	100	23356	100	100	23004	2.13937
semialdehyde dehydrogenase family protein	Phvul.002G323900.1|PACid:27170189	41 kDa	0.42	3	0.1	9	0.1	0.1	4	2.88095		ATP synthase delta-subunit gene	Phvul.003G211100.1|PACid:27143051	27 kDa	0.49	23082	26046	22933	26732	25409	23230	0.956084
serine transhydroxymethyltransferase 1	Phvul.003G286600.1|PACid:27144203	57 kDa	0.42	16	37	14	15	16	16	1.42553		Unknown	Phvul.006G159000.1|PACid:27166926	36 kDa	0.49	100	9529.2	100	9992.7	100	9876	0.487223
Aldolase-type TIM barrel family protein	Phvul.005G051800.1|PACid:27150154	41 kDa	0.42	7	16	4	6	7	4	1.58824		Unknown	Phvul.007G276300.1|PACid:27158924	25 kDa	0.49	27335	100	27643	100	100	26276	2.0803
phosphoribulokinase	Phvul.002G133100.1|PACid:27167548	45 kDa	0.42	27	41	25	15	34	24	1.27397		Nucleoside diphosphate kinase family protein	Phvul.010G045400.1|PACid:27141223	17 kDa	0.49	19199	18639	20535	17689	12898	21838	1.11346
D-ribulose-5-phosphate-3-epimerase	Phvul.003G188800.1|PACid:27143201	30 kDa	0.43	3	14	5	4	5	4	1.69231		cystatin B	Phvul.006G018600.1|PACid:27166305	11 kDa	0.49	7685.1	6042.1	17725	100	12180	7550	1.58609
GDSL-like Lipase/Acylhydrolase superfamily protein	Phvul.006G169000.1|PACid:27165367	40 kDa	0.43	0.1	8	0.1	8	5	3	0.5125		Matrixin family protein	Phvul.004G021000.1|PACid:27156589	32 kDa	0.49	25828	100	22756	100	100	22896	2.1079
Heat shock protein 7Unknown (Hsp 7Unknown) family protein	Phvul.002G301400.1|PACid:27167727	73 kDa	0.43	38	7	41	0.1	8	37	1.90687		peptide met sulfoxide reductase 4	Phvul.008G267100.1|PACid:27155730	29 kDa	0.49	100	3253.2	100	14752	100	100	0.230952
ATP synthase D chain, mitochondrial	Phvul.007G092100.1|PACid:27159460	20 kDa	0.43	7	6	17	7	4	9	1.5		photosystem II stability/assembly factor, chloroplast (HCF136)	Phvul.011G029800.1|PACid:27152681 (+1)	43 kDa	0.49	14621	17851	11426	100	13425	17724	1.40478
triosephosphate isomerase	Phvul.001G181000.1|PACid:27163856	33 kDa	0.43	23	29	33	19	26	29	1.14865		nucleoside diphosphate kinase 2	Phvul.003G208500.1|PACid:27143746	25 kDa	0.49	6755.5	17843	10650	14957	19922	10203	0.781875
Unknown	Phvul.002G299900.1|PACid:27170530	16 kDa	0.44	3	0.1	3	7	5	0.1	0.504132		Lactate/malate dehydrogenase family protein	Phvul.011G159000.1|PACid:27151726	36 kDa	0.49	18545	17492	17812	15307	21705	21705	0.917094
phosphoglycerate kinase	Phvul.005G050800.1|PACid:27148357 (+1)	42 kDa	0.44	22	12	17	9	14	18	1.2439		2-cysteine peroxiredoxin B	Phvul.001G194100.1|PACid:27163227 (+1)	29 kDa	0.5	23176	25047	21035	27094	25340	21401	0.93801
CAP (Cysteine-rich secretory proteins, Antigen 5, and Pathogenesis-related 1 protein) superfamily protein	Phvul.006G197200.1|PACid:27167139	17 kDa	0.45	3	0.1	12	0.1	0.1	5	2.90385		Unknown	Phvul.007G080400.1|PACid:27161686	29 kDa	0.5	6689	10821	6909.8	9725.9	4788	5359.6	1.22876
glycosylphosphatidylinositol-anchored lipid protein transfer 1	Phvul.001G262400.1|PACid:27162408	20 kDa	0.46	0.1	11	3	8	7	7	0.640909		CAP (Cysteine-rich secretory proteins, Antigen 5, and Pathogenesis-related 1 protein) superfamily protein	Phvul.006G197200.1|PACid:27167139	17 kDa	0.5	6858.1	100	26275	100	100	13243	2.47215
photosynthetic electron transfer C	Phvul.005G109400.1|PACid:27148765	24 kDa	0.46	14	24	16	31	19	17	0.80597		osmotin 34	Phvul.002G286500.1|PACid:27168463	24 kDa	0.5	9166	3165.1	16681	8452.9	100	9546.1	1.60297
Mog1/PsbP/DUF1795-like photosystem II reaction center PsbP family protein	Phvul.009G134500.1|PACid:27147631	29 kDa	0.46	2	9	5	3	4	4	1.45455		photosystem I subunit G	Phvul.005G004000.1|PACid:27149968	17 kDa	0.5	20482	21273	100	100	100	20317	2.04002
FK5Unknown6- and rapamycin-binding protein 15 kD-2	Phvul.010G024400.1|PACid:27140309	17 kDa	0.46	0.1	0.1	4	4	0.1	5	0.461538		Glycosyl hydrolase superfamily protein	Phvul.011G077900.1|PACid:27152470	35 kDa	0.5	12711	100	12769	100	100	12375	2.03419
osmotin 34	Phvul.002G286500.1|PACid:27168463	24 kDa	0.46	18	2	44	8	0.1	22	2.12625		ascorbate peroxidase 1	Phvul.011G071300.1|PACid:27150621	27 kDa	0.5	11288	15716	17251	14392	19494	15615	0.894022
Tetratricopeptide repeat (TPR)-like superfamily protein	Phvul.009G050400.1|PACid:27147124	25 kDa	0.46	14	20	19	26	23	14	0.84127		ribosomal protein L9	Phvul.011G086500.1|PACid:27151903	22 kDa	0.5	16383	15339	15103	17486	15358	15698	0.964629
basic chitinase	Phvul.009G116600.1|PACid:27147911	35 kDa	0.48	22	4	28	0.1	0.1	27	1.98529		Rho termination factor	Phvul.007G192400.1|PACid:27159645	41 kDa	0.5	100	100	8290.3	100	8575.2	8406.7	0.497035
Ribosomal protein L1p/L1Unknowne family	Phvul.011G011500.1|PACid:27152548	38 kDa	0.48	11	9	4	0.1	7	9	1.49068		chlorophyll A/B binding protein 1	Phvul.002G196400.1|PACid:27168445	28 kDa	0.51	36081	14529	24119	22825	15993	21707	1.23468
Unknown	Phvul.007G276300.1|PACid:27158924	25 kDa	0.48	28	0.1	35	0.1	0.1	29	2.16096		Tautomerase/MIF superfamily protein	Phvul.008G092500.1|PACid:27153936	12 kDa	0.51	23932	22739	15752	6810.7	27286	14365	1.28809
thylakoid lumen 15.Unknown kDa protein	Phvul.007G219800.1|PACid:27160258	25 kDa	0.48	0.1	6	5	10	10	0.1	0.552239		chloroplastic acetylcoenzyme A carboxylase 1	Phvul.008G053000.1|PACid:27156321	28 kDa	0.51	19117	10774	20701	21491	18866	17392	0.876067
Unknown	Phvul.003G059800.1|PACid:27142374	17 kDa	0.48	4	8	6	8	0.1	4	1.4876		photosystem I subunit F	Phvul.003G186300.1|PACid:27143658	24 kDa	0.51	100	41668	32989	100	36740	100	2.02374
Glucose-methanol-choline (GMC) oxidoreductase family protein	Phvul.003G213000.1|PACid:27143592	63 kDa	0.49	3	0.1	0.1	0.1	2	5	0.450704		acetyl Co-enzyme a carboxylase biotin carboxylase subunit	Phvul.002G302900.1|PACid:27167697	58 kDa	0.51	19867	12377	28885	20447	29208	23241	0.838578
fructose-bisphosphate aldolase 2	Phvul.011G039100.1|PACid:27152068	43 kDa	0.49	40	46	19	20	32	32	1.25		Glutaredoxin family protein	Phvul.007G155300.1|PACid:27158905	25 kDa	0.51	100	100	33415	31897	100	35639	0.496999
Ribosomal protein L3 family protein	Phvul.009G117700.1|PACid:27146237	29 kDa	0.49	6	0.1	3	0.1	4	0.1	2.16667		ferredoxin/thioredoxin reductase subunit A (variable subunit) 2	Phvul.004G000400.1|PACid:27156444	17 kDa	0.51	100	20618	100	24976	17358	100	0.490597
rubredoxin family protein	Phvul.002G037500.1|PACid:27170020	29 kDa	0.49	0.1	6	7	11	4	5	0.655		Thioredoxin superfamily protein	Phvul.001G186000.1|PACid:27164196	23 kDa	0.51	24462	15943	22704	23281	15453	16748	1.13747
lactoylglutathione lyase family protein / glyoxalase I family protein	Phvul.011G084400.1|PACid:27151118	26 kDa	0.5	4	0.1	6	5	4	5	0.721429		photosystem I subunit E-2	Phvul.008G133700.1|PACid:27154680	14 kDa	0.51	11054	11565	12552	100	11836	13908	1.3609
Plastid-lipid associated protein PAP / fibrillin family protein	Phvul.006G214200.1|PACid:27167014	26 kDa	0.5	0.1	5	4	9	0.1	7	0.565217		Glycine cleavage T-protein family	Phvul.003G080400.1|PACid:27143356	44 kDa	0.52	16902	19666	19341	14640	20568	30835	0.846555
Translation elongation factor EF1B/ribosomal protein S6 family protein	Phvul.001G007700.1|PACid:27162385	25 kDa	0.51	8	5	10	0.1	6	10	1.42857		mitochondrial lipoamide dehydrogenase 1	Phvul.003G118800.1|PACid:27145068	53 kDa	0.52	12857	14655	15808	15918	12151	20839	0.885745
Leucine-rich repeat (LRR) family protein	Phvul.005G149200.1|PACid:27149882	38 kDa	0.51	5	4	11	9	9	7	0.8		thioredoxin M-type 4	Phvul.009G133900.1|PACid:27147068	20 kDa	0.52	12318	32272	16706	22933	27913	23568	0.823716
dehydratase family	Phvul.006G152700.1|PACid:27164979	64 kDa	0.51	0.1	0.1	8	0.1	0.1	2	3.72727		thioredoxin family protein	Phvul.007G215900.1|PACid:27159210	40 kDa	0.52	14520	100	12874	100	100	13763	1.96906
chaperonin 2Unknown	Phvul.009G224900.1|PACid:27147885	26 kDa	0.52	11	16	20	16	13	12	1.14634		CAX interacting protein 1	Phvul.008G055800.1|PACid:27153099	20 kDa	0.52	10458	10304	14686	8314.1	11288	11977	1.12251
Glutaredoxin family protein	Phvul.007G155300.1|PACid:27158905	25 kDa	0.52	0.1	0.1	6	6	0.1	6	0.512397		Bifunctional inhibitor/lipid-transfer protein/seed storage 2S albumin superfamily protein	Phvul.002G234400.1|PACid:27171155	20 kDa	0.52	100	100	10489	100	100	38578	0.275646
ketol-acid reductoisomerase	Phvul.005G095900.1|PACid:27150237	63 kDa	0.52	0.1	0.1	3	3	0.1	3	0.52459		2Fe-2S ferredoxin-like superfamily protein	Phvul.006G216700.1|PACid:27165760	22 kDa	0.52	10596	100	31192	19336	72179	100	0.457218
Unknown	Phvul.010G096700.1|PACid:27141142 (+1)	20 kDa	0.52	11	0.1	23	0.1	0.1	16	2.10494		Aldolase-type TIM barrel family protein	Phvul.008G003600.1|PACid:27156266	48 kDa	0.52	100	100	10674	100	10445	10820	0.508963
Ribosomal protein S5 family protein	Phvul.002G229700.1|PACid:27168387	32 kDa	0.52	3	3	0.1	0.1	0.1	3	1.90625		N-terminal nucleophile aminohydrolases (Ntn hydrolases) superfamily protein	Phvul.009G103400.1|PACid:27146052	25 kDa	0.52	16521	15597	15035	100	14974	19675	1.35696
photosystem II subunit P-1	Phvul.008G196500.1|PACid:27155546	28 kDa	0.52	29	86	40	30	43	44	1.32479		small ubiquitin-like modifier 2	Phvul.006G047600.1|PACid:27166464	11 kDa	0.53	100	100	23563	27445	100	19522	0.504876
pathogenesis-related 4	Phvul.006G102300.1|PACid:27166843	16 kDa	0.53	14	2	10	0.1	0.1	14	1.83099		Aconitase/3-isopropylmalate dehydratase protein	Phvul.010G153800.1|PACid:27140298	27 kDa	0.53	10466	7261.2	11262	100	8574.4	12358	1.37831
Plant basic secretory protein (BSP) family protein	Phvul.007G040900.1|PACid:27160861	25 kDa	0.53	7	0.1	5	0.1	0.1	6	1.95161		cold, circadian rhythm, and rna binding 2	Phvul.009G023700.1|PACid:27146551	18 kDa	0.54	8665.4	5797.2	14735	6651	6630.2	10103	1.2486
Plant basic secretory protein (BSP) family protein	Phvul.007G041000.1|PACid:27158828	26 kDa	0.53	13	0.1	6	0.1	0.1	9	2.07609		Ribosomal protein S5/Elongation factor G/III/V family protein	Phvul.005G058100.1|PACid:27149231 (+1)	94 kDa	0.54	14506	14273	15447	12282	14300	15581	1.04893
HAD superfamily, subfamily IIIB acid phosphatase	Phvul.004G174200.1|PACid:27156865	28 kDa	0.53	2	0.1	0.1	0.1	0.1	7	0.305556		Glutathione S-transferase, C-terminal-like;Translation elongation factor EF1B/ribosomal protein S6	Phvul.008G204800.1|PACid:27153650	24 kDa	0.54	16343	9647.3	22179	100	11416	22102	1.43284
Pentapeptide repeat-containing protein	Phvul.002G061100.1|PACid:27170040	30 kDa	0.53	4	12	5	13	10	5	0.75		ribosomal protein 5B	Phvul.005G107000.1|PACid:27150398	23 kDa	0.54	16756	100	16077	100	100	17137	1.89958
Aldolase superfamily protein	Phvul.008G189200.1|PACid:27156044	39 kDa	0.54	20	13	17	7	13	21	1.21951		HSP7Unknown-interacting protein 1	Phvul.003G214200.1|PACid:27143904	45 kDa	0.54	12365	100	19792	100	100	16208	1.96593
ketol-acid reductoisomerase	Phvul.011G134200.1|PACid:27152507	63 kDa	0.54	0.1	0.1	4	3	0.1	5	0.518519		TCP-1/cpn6Unknown chaperonin family protein	Phvul.005G051700.1|PACid:27149677	63 kDa	0.54	22621	21135	36813	20663	27557	21321	1.15858
uracil phosphoribosyltransferase	Phvul.010G015300.1|PACid:27140500	31 kDa	0.54	0.1	0.1	4	7	0.1	2	0.461538		cyclophilin 2Unknown-2	Phvul.007G001100.1|PACid:27159556	29 kDa	0.54	29197	27289	52856	33030	35828	21627	1.2084
photosystem I subunit G	Phvul.005G004000.1|PACid:27149968	17 kDa	0.54	5	3	0.1	0.1	0.1	4	1.92857		ribosomal protein L12-C	Phvul.011G027700.1|PACid:27151838 (+1)	25 kDa	0.54	47954	51960	53847	62793	55384	46023	0.936425
high cyclic electron flow 1	Phvul.008G112000.1|PACid:27156195	44 kDa	0.55	13	13	16	13	16	8	1.13514		Ribosomal protein S5 family protein	Phvul.003G018300.1|PACid:27144624	30 kDa	0.55	25749	25826	25858	28871	23092	29514	0.950366
Unknown	Phvul.006G065100.1|PACid:27165277	10 kDa	0.55	0.1	9	5	12	5	4	0.671429		gamma-glutamyl hydrolase 1	Phvul.005G080600.1|PACid:27148830	38 kDa	0.55	15498	6204.3	23747	11502	11263	12692	1.28181
Cytosol aminopeptidase family protein	Phvul.009G195000.1|PACid:27146348	60 kDa	0.55	8	16	0.1	0.1	7	7	1.70922		Tim1Unknown/DDP family zinc finger protein	Phvul.011G064100.1|PACid:27151760	11 kDa	0.55	100	100	20127	19186	100	18853	0.532971
HSP7Unknown-interacting protein 1	Phvul.003G214200.1|PACid:27143904	45 kDa	0.56	3	0.1	7	0.1	0.1	5	1.94231		polygalacturonase inhibiting protein 1	Phvul.009G180400.1|PACid:27146878	23 kDa	0.55	100	100	22596	100	18688	24820	0.522748
Co-chaperone GrpE family protein	Phvul.001G108000.1|PACid:27164859	37 kDa	0.56	12	4	14	0.1	9	12	1.4218		Glutaredoxin family protein	Phvul.008G156300.1|PACid:27154836	11 kDa	0.55	8783.8	100	4640.5	5301.7	6317.6	6855	0.73206
purple acid phosphatase 29	Phvul.010G121500.1|PACid:27140024	44 kDa	0.56	8	0.1	13	0.1	0.1	11	1.88393		chaperonin 1Unknown	Phvul.001G120500.1|PACid:27164304	11 kDa	0.55	100	19686	26565	16516	21056	25196	0.73845
photosystem I P subunit	Phvul.009G258500.1|PACid:27146197	19 kDa	0.57	4	11	0.1	6	8	7	0.719048		O-acetylserine (thiol) lyase (OAS-TL) isoform A1	Phvul.006G099100.1|PACid:27165095	34 kDa	0.56	18185	21439	14866	17281	23244	18867	0.917464
Nucleoside diphosphate kinase family protein	Phvul.010G045400.1|PACid:27141223	17 kDa	0.57	20	16	20	16	21	24	0.918033		Ribosomal protein S4 (RPS4A) family protein	Phvul.008G221000.1|PACid:27153328 (+1)	30 kDa	0.56	21329	100	19429	100	100	21711	1.86473
Calcium-dependent lipid-binding (CaLB domain) family protein	Phvul.010G093800.1|PACid:27139987	17 kDa	0.57	6	2	10	0.1	4	8	1.4876		semialdehyde dehydrogenase family protein	Phvul.002G323900.1|PACid:27170189	41 kDa	0.56	15875	100	12646	100	100	15202	1.85827
basic transcription factor 3	Phvul.011G041900.1|PACid:27150706	17 kDa	0.57	5	0.1	10	0.1	4	5	1.65934		ketol-acid reductoisomerase	Phvul.005G095900.1|PACid:27150237	63 kDa	0.56	100	100	22195	17335	100	25048	0.527152
glyceraldehyde 3-phosphate dehydrogenase A subunit	Phvul.001G098100.1|PACid:27162772	43 kDa	0.58	45	77	52	61	50	43	1.12987		Plant basic secretory protein (BSP) family protein	Phvul.007G041000.1|PACid:27158828	26 kDa	0.56	14427	100	9644.6	100	100	12586	1.89047
lipoamide dehydrogenase 1	Phvul.009G254900.1|PACid:27146148	59 kDa	0.58	5	5	12	12	8	7	0.814815		Calcium-dependent lipid-binding (CaLB domain) family protein	Phvul.010G093800.1|PACid:27139987	17 kDa	0.56	23273	20653	27942	100	17332	34762	1.37694
cystatin B	Phvul.006G018600.1|PACid:27166305	11 kDa	0.59	4	4	5	0.1	5	5	1.28713		photosystem II subunit O-2	Phvul.002G024000.1|PACid:27170025	35 kDa	0.56	25397	30707	25068	31810	35835	22006	0.905422
ankyrin repeat-containing 2B	Phvul.005G006400.1|PACid:27149778	37 kDa	0.59	8	8	13	11	10	11	0.90625		HISTIDINE TRIAD NUCLEOTIDE-BINDING 2	Phvul.009G240300.1|PACid:27145569	19 kDa	0.57	100	19098	21740	13540	18378	22740	0.748985
thioredoxin F2	Phvul.008G053300.1|PACid:27153949	20 kDa	0.59	7	8	8	10	5	5	1.15		Co-chaperone GrpE family protein	Phvul.001G108000.1|PACid:27164859	37 kDa	0.57	26342	25756	31487	100	33758	29675	1.31562
Concanavalin A-like lectin protein kinase family protein	Phvul.007G070300.1|PACid:27160454	33 kDa	0.6	0.1	8	0.1	7	7	0.1	0.58156		MLP-like protein 423	Phvul.009G252400.1|PACid:27146141	21 kDa	0.57	30846	18473	34899	24381	27519	22688	1.12911
biotin/lipoyl attachment domain-containing protein	Phvul.001G247000.1|PACid:27162259	31 kDa	0.61	3	0.1	6	4	3	5	0.758333		nucleosome assembly protein 1;2	Phvul.003G135500.1|PACid:27145128	42 kDa	0.57	100	100	7253.6	100	4467.3	9628.6	0.525053
Cysteine proteinases superfamily protein	Phvul.001G220100.1|PACid:27164419 (+1)	40 kDa	0.61	0.1	0.1	4	3	0.1	4	0.591549		Kunitz family trypsin and protease inhibitor protein	Phvul.011G169900.1|PACid:27152671	23 kDa	0.57	32711	100	25866	18343	100	18784	1.57619
Ribosomal protein L21	Phvul.007G089400.1|PACid:27159913	24 kDa	0.61	4	0.1	0.1	0.1	4	3	0.591549		Unknown	Phvul.004G031300.1|PACid:27156615	52 kDa	0.57	2634.2	100	5328.6	100	100	4090.3	1.87931
Ribose 5-phosphate isomerase, type A protein	Phvul.006G100600.1|PACid:27165968	30 kDa	0.61	14	18	19	17	14	17	1.0625		ATPase, FUnknown complex, subunit B/B\', bacterial/chloroplast	Phvul.009G092400.1|PACid:27147636	51 kDa	0.58	21157	12409	9609.9	13486	16995	19715	0.860146
Bifunctional inhibitor/lipid-transfer protein/seed storage 2S albumin superfamily protein	Phvul.002G234400.1|PACid:27171155	20 kDa	0.61	0.1	0.1	5	0.1	0.1	2	2.36364		methyl-CPG-binding domain 1Unknown	Phvul.010G155700.1|PACid:27140389	32 kDa	0.58	9981.5	11371	9098.4	11812	14013	8019.1	0.89974
beta-hexosaminidase 1	Phvul.008G015400.1|PACid:27154056	62 kDa	0.61	4	0.1	3	0.1	0.1	4	1.69048		serine transhydroxymethyltransferase 1	Phvul.003G286600.1|PACid:27144203	57 kDa	0.58	13745	20693	13442	11159	10605	19383	1.16363
Ribosomal protein S13/S18 family	Phvul.007G080500.1|PACid:27160297 (+1)	18 kDa	0.61	5	0.1	0.1	0.1	0.1	2	2.36364		triosephosphate isomerase	Phvul.001G181000.1|PACid:27163856	33 kDa	0.58	19866	24778	22524	18574	22024	23063	1.05509
Mog1/PsbP/DUF1795-like photosystem II reaction center PsbP family protein	Phvul.001G119100.1|PACid:27164285	29 kDa	0.61	0.1	5	0.1	0.1	2	0.1	2.36364		beta-hexosaminidase 1	Phvul.008G015400.1|PACid:27154056	62 kDa	0.58	11569	100	11225	100	100	12512	1.80098
Rubredoxin-like superfamily protein	Phvul.010G153300.1|PACid:27140618	18 kDa	0.61	0.1	0.1	5	0.1	0.1	2	2.36364		GDP-D-mannose 3\',5\'-epimerase	Phvul.006G101600.1|PACid:27165995 (+1)	42 kDa	0.58	6524.6	100	100	100	100	17679	0.376117
fibrillin	Phvul.006G145100.1|PACid:27165511	34 kDa	0.61	0.1	5	0.1	0.1	2	0.1	2.36364		Histone superfamily protein	Phvul.011G066500.1|PACid:27150778	16 kDa	0.58	33971	100	17582	100	17320	14291	1.62887
MLP-like protein 423	Phvul.009G252400.1|PACid:27146141	21 kDa	0.62	8	7	7	6	5	9	1.1		germin 3	Phvul.009G227800.1|PACid:27146968	22 kDa	0.59	48255	41901	57804	48438	46501	67208	0.912505
6UnknownS acidic ribosomal protein family	Phvul.007G230200.1|PACid:27159091	11 kDa	0.62	12	0.1	15	4	5	10	1.42632		tubulin beta 8	Phvul.006G126100.1|PACid:27165097	50 kDa	0.59	15185	11308	22001	11831	18737	10982	1.16712
chloroplast RNA binding	Phvul.001G223800.1|PACid:27161823	42 kDa	0.63	17	35	16	12	27	17	1.21429		thylakoid lumen 15.Unknown kDa protein	Phvul.007G219800.1|PACid:27160258	25 kDa	0.59	100	20509	17060	28636	29324	100	0.648794
Unknown	Phvul.004G172100.1|PACid:27156725	34 kDa	0.63	0.1	0.1	7	0.1	0.1	3	2.25		homolog of carrot EP3-3 chitinase	Phvul.011G051500.1|PACid:27150682	26 kDa	0.59	100	2151.6	100	100	100	5650	0.401983
methionine sulfoxide reductase B 2	Phvul.006G198700.1|PACid:27166655	21 kDa	0.64	0.1	0.1	6	4	0.1	6	0.613861		Protein of unknown function, DUF642	Phvul.001G053100.1|PACid:27162892	40 kDa	0.6	19582	12503	18840	10510	13949	20246	1.13913
ferredoxin/thioredoxin reductase subunit A (variable subunit) 2	Phvul.004G000400.1|PACid:27156444	17 kDa	0.64	0.1	6	0.1	6	4	0.1	0.613861		photosystem I subunit E-2	Phvul.007G155500.1|PACid:27161570	14 kDa	0.6	17042	41954	13389	21760	13182	21380	1.2852
polygalacturonase inhibiting protein 1	Phvul.009G180400.1|PACid:27146878	23 kDa	0.64	0.1	0.1	6	0.1	4	6	0.613861		purple acid phosphatase 29	Phvul.010G121500.1|PACid:27140024	44 kDa	0.6	23412	100	21593	100	100	25568	1.75043
RNA-binding (RRM/RBD/RNP motifs) family protein	Phvul.009G033600.1|PACid:27145380 (+1)	34 kDa	0.64	4	6	0.1	0.1	6	0.1	1.62903		Subtilase family protein	Phvul.008G228700.1|PACid:27153723 (+1)	80 kDa	0.6	10845	100	8357.2	100	100	10886	1.74113
Bifunctional inhibitor/lipid-transfer protein/seed storage 2S albumin superfamily protein	Phvul.001G050300.1|PACid:27164014	12 kDa	0.64	8	6	7	15	4	7	0.807692		thioredoxin-dependent peroxidase 1	Phvul.004G166100.1|PACid:27158250	17 kDa	0.6	20253	11345	100	11215	16309	14404	0.75601
Glycosyl hydrolase superfamily protein	Phvul.011G077900.1|PACid:27152470	35 kDa	0.65	8	0.1	10	0.1	0.1	11	1.61607		Unknown	Phvul.008G216800.1|PACid:27154777	15 kDa	0.61	100	21257	11141	17960	100	100	1.78954
S-adenosylmethionine synthetase family protein	Phvul.003G120000.1|PACid:27144204	43 kDa	0.66	7	3	9	5	6	12	0.826087		Papain family cysteine protease	Phvul.001G009900.1|PACid:27164490	40 kDa	0.61	100	9119.8	18741	10288	13001	13823	0.753417
nucleosome assembly protein 1;2	Phvul.003G135500.1|PACid:27145128	42 kDa	0.66	0.1	0.1	5	0.1	4	4	0.641975		Unknown	Phvul.010G096700.1|PACid:27141142 (+1)	20 kDa	0.61	8065.4	100	6750	100	100	8560.5	1.70257
HAD superfamily, subfamily IIIB acid phosphatase	Phvul.010G144300.1|PACid:27140721	29 kDa	0.66	4	0.1	9	3	2	15	0.655		cold-regulated 47	Phvul.009G004400.1|PACid:27147548	23 kDa	0.61	8604.2	100	12418	4850.4	100	8760.3	1.54056
monodehydroascorbate reductase 1	Phvul.007G230300.1|PACid:27160270	47 kDa	0.66	14	8	8	6	5	14	1.2		cyclophilin 38	Phvul.004G017000.1|PACid:27158411	49 kDa	0.62	19141	18154	19251	20026	19260	14276	1.05571
proteasome subunit PAB1	Phvul.005G059300.1|PACid:27149616	26 kDa	0.67	14	11	11	0.1	13	16	1.23711		calcium sensing receptor	Phvul.003G180100.1|PACid:27143766	41 kDa	0.62	16230	15259	16921	18324	100	19839	1.26519
Heavy metal transport/detoxification superfamily protein	Phvul.004G019800.1|PACid:27157513	19 kDa	0.67	9	7	16	16	13	8	0.864865		polygalacturonase inhibiting protein 1	Phvul.002G201800.1|PACid:27170678	36 kDa	0.62	100	100	13539	100	100	32140	0.42483
Thioredoxin superfamily protein	Phvul.001G186000.1|PACid:27164196	23 kDa	0.67	6	13	10	10	9	7	1.11538		peroxisomal NAD-malate dehydrogenase 2	Phvul.002G216800.1|PACid:27167607 (+1)	37 kDa	0.62	10019.1	13876	8739.3	8634.9	8958	11985	1.10334
photosystem I subunit E-2	Phvul.008G133700.1|PACid:27154680	14 kDa	0.67	4	14	3	0.1	8	7	1.39073		ribosome recycling factor, chloroplast precursor	Phvul.007G172400.1|PACid:27161702	30 kDa	0.63	21622	19521	17401	15107	19068	21080	1.05952
Rad23 UV excision repair protein family	Phvul.007G026400.1|PACid:27161353	42 kDa	0.68	4	4	8	4	4	6	1.14286		glycine-rich protein 2B	Phvul.009G025100.1|PACid:27146047	19 kDa	0.63	15099	10922	11181	10376	18681	12589	0.893291
RAB GTPase homolog E1B	Phvul.003G205600.1|PACid:27144536	52 kDa	0.68	18	11	8	0.1	18	11	1.27148		Dihydrolipoamide succinyltransferase	Phvul.008G269300.1|PACid:27153844	50 kDa	0.63	13570	9247.9	13195	11364	12458	14949	0.928862
photosystem II reaction center PSB28 protein	Phvul.007G153500.1|PACid:27160448	20 kDa	0.68	5	6	9	6	7	9	0.909091		Ribonuclease E inhibitor RraA/Dimethylmenaquinone methyltransferase	Phvul.006G196200.1|PACid:27167308	30 kDa	0.63	25776	15071	31442	21409	12447	28103	1.16672
ubiquitin E2 variant 1D-4	Phvul.007G270100.1|PACid:27158769	17 kDa	0.68	4	0.1	9	0.1	0.1	8	1.59756		acyl-CoA-binding protein 6	Phvul.002G127700.1|PACid:27168742	10 kDa	0.63	23704	15121	24256	18419	15197	23483	1.10477
TCP-1/cpn6Unknown chaperonin family protein	Phvul.005G051700.1|PACid:27149677	63 kDa	0.68	28	19	22	16	23	25	1.07812		SOUL heme-binding family protein	Phvul.011G173900.1|PACid:27150755	25 kDa	0.63	14667	11597	19583	18042	15809	15827	0.922883
RNA-binding (RRM/RBD/RNP motifs) family protein	Phvul.007G150700.1|PACid:27158969	30 kDa	0.68	12	8	16	5	11	15	1.16129		Unknown	Phvul.006G047400.1|PACid:27167346	11 kDa	0.63	7454.2	12132	16570	19997	7273.9	16166	0.832384
nuclear encoded CLP protease 5	Phvul.007G213700.1|PACid:27160580	33 kDa	0.68	6	8	0.1	4	6	0.1	1.39604		Enolase	Phvul.001G186100.1|PACid:27162935	48 kDa	0.64	24028	17187	18344	14730	21686	18714	1.08034
ATPase, F1 complex, gamma subunit protein	Phvul.006G149700.1|PACid:27166321 (+1)	41 kDa	0.68	11	14	0.1	10	8	0.1	1.38674		Uroporphyrinogen decarboxylase	Phvul.001G248800.1|PACid:27164776	43 kDa	0.64	13767	100	14402	100	100	17103	1.63376
Kunitz family trypsin and protease inhibitor protein	Phvul.004G137600.1|PACid:27157016	23 kDa	0.68	0.1	0.1	3	0.1	0.1	6	0.516129		Remorin family protein	Phvul.004G116700.1|PACid:27157927	22 kDa	0.64	10555	13837	15027	15199	10353	10730	1.08646
rotamase CYP 3	Phvul.011G026900.1|PACid:27152345	18 kDa	0.68	22	22	26	20	21	26	1.04478		Tetratricopeptide repeat (TPR)-like superfamily protein	Phvul.009G050400.1|PACid:27147124	25 kDa	0.64	34106	29913	30149	30775	28985	40020	0.943756
Calcium-binding EF-hand family protein	Phvul.002G329300.1|PACid:27167898	19 kDa	0.68	0.1	0.1	6	0.1	0.1	3	1.9375		CLPC homologue 1	Phvul.009G162100.1|PACid:27145996	102 kDa	0.64	20357	100	16712	28728	24667	100	0.694813
Nucleoside diphosphate kinase family protein	Phvul.002G297900.1|PACid:27170671	26 kDa	0.68	0.1	6	0.1	0.1	3	0.1	1.9375		translationally controlled tumor protein	Phvul.009G248700.1|PACid:27147167	19 kDa	0.64	28588	100	22047	100	16822	17906	1.45673
GDSL-like Lipase/Acylhydrolase superfamily protein	Phvul.006G107300.1|PACid:27166126	40 kDa	0.68	34	25	33	31	28	29	1.04545		Unknown	Phvul.006G142900.1|PACid:27166865	17 kDa	0.64	100	9669.4	11449	8565.6	100	5974.3	1.44935
Stress responsive alpha-beta barrel domain protein	Phvul.003G132200.1|PACid:27143060	28 kDa	0.68	2	0.1	0.1	4	0.1	0.1	0.52381		RAB GTPase homolog G3F	Phvul.011G046100.1|PACid:27150539	23 kDa	0.65	100	100	16884	13781	100	13801	0.617152
light harvesting complex of photosystem II 5	Phvul.004G128200.1|PACid:27158466	31 kDa	0.69	5	11	8	8	9	4	1.14286		chloroplast stem-loop binding protein of 41 kDa	Phvul.007G172100.1|PACid:27158479	44 kDa	0.66	32220	35006	100	100	41839	100	1.60151
2Fe-2S ferredoxin-like superfamily protein	Phvul.006G216700.1|PACid:27165760	22 kDa	0.69	3	0.1	6	9	4	0.1	0.694656		carbonic anhydrase 1	Phvul.004G013500.1|PACid:27157066 (+4)	37 kDa	0.66	37180	28457	30081	26915	34295	29637	1.05362
Glutaredoxin family protein	Phvul.008G156300.1|PACid:27154836	11 kDa	0.69	5	0.1	7	6	3	6	0.806667		chloroplast RNA binding	Phvul.001G223800.1|PACid:27161823	42 kDa	0.66	17583	18710	13019	19125	22629	12511	0.908726
Cysteine proteinases superfamily protein	Phvul.003G130600.1|PACid:27142905	23 kDa	0.69	0.1	0.1	6	0.1	2	8	0.613861		Cysteine proteinases superfamily protein	Phvul.003G130600.1|PACid:27142905	23 kDa	0.66	100	100	19181	100	14573	16130	0.629192
Ribosomal protein L1Unknown family protein	Phvul.002G074600.1|PACid:27169727 (+1)	34 kDa	0.69	7	0.1	0.1	0.1	4	7	0.648649		Ribosomal protein L11 family protein	Phvul.011G079400.1|PACid:27152477	18 kDa	0.66	30372	32889	29241	35483	34528	26729	0.956192
31-kDa RNA binding protein	Phvul.009G171500.1|PACid:27147461	33 kDa	0.69	15	14	22	19	21	15	0.927273		nascent polypeptide-associated complex subunit alpha-like protein 2	Phvul.009G038400.1|PACid:27146681	24 kDa	0.66	22447	100	25428	100	17805	16095	1.41103
manganese superoxide dismutase 1	Phvul.009G141600.1|PACid:27146654	27 kDa	0.69	6	5	0.1	0.1	5	3	1.37037		CLP protease P4	Phvul.002G128500.1|PACid:27168214	33 kDa	0.66	12145	100	100	100	25105	100	0.487848
Oxidoreductase, zinc-binding dehydrogenase family protein	Phvul.008G151800.1|PACid:27154209	34 kDa	0.7	14	22	16	17	12	19	1.08333		copper ion binding;cobalt ion binding;zinc ion binding	Phvul.002G265700.1|PACid:27169903	28 kDa	0.67	21166	18701	15433	23028	25122	12900	0.905815
Aldolase superfamily protein	Phvul.008G282000.1|PACid:27155233	39 kDa	0.7	8	18	6	0.1	14	11	1.2749		fructose-bisphosphate aldolase 2	Phvul.011G039100.1|PACid:27152068	43 kDa	0.67	30448	21795	27496	22136	28246	25138	1.05587
U2 small nuclear ribonucleoprotein A	Phvul.003G001500.1|PACid:27142150 (+1)	32 kDa	0.7	4	2	4	0.1	3	5	1.23457		thylakoidal ascorbate peroxidase	Phvul.009G126500.1|PACid:27147739 (+1)	48 kDa	0.67	100	10429	17643	13931	11488	10013.3	0.795094
MLP-like protein 423	Phvul.009G253000.1|PACid:27146855	17 kDa	0.71	3	0.1	3	0.1	0.1	4	1.45238		homolog of Synechocystis YCF37	Phvul.002G023600.1|PACid:27169948	17 kDa	0.67	100	32091	100	100	36264	16478	0.611086
glutathione peroxidase 1	Phvul.001G041100.1|PACid:27162927	30 kDa	0.71	0.1	6	0.1	5	4	0.1	0.681319		pathogenesis-related 4	Phvul.006G102200.1|PACid:27165793	21 kDa	0.68	13261	11233	15535	19778	100	12211	1.24744
Aldolase-type TIM barrel family protein	Phvul.008G003600.1|PACid:27156266	48 kDa	0.71	0.1	0.1	4	0.1	3	3	0.688525		Ribosomal protein L3 family protein	Phvul.009G117700.1|PACid:27146237	29 kDa	0.68	23867	100	21909	100	29209	100	1.55993
N-terminal nucleophile aminohydrolases (Ntn hydrolases) superfamily protein	Phvul.009G103400.1|PACid:27146052	25 kDa	0.71	4	4	4	0.1	5	5	1.18812		Aldolase superfamily protein	Phvul.009G127100.1|PACid:27146420	45 kDa	0.68	22249	10753	21557	20738	20951	18039	0.913458
ribulose-bisphosphate carboxylases	Phvul.011G089000.1|PACid:27150529	10 kDa	0.71	7	12	10	9	12	10	0.935484		germin 3	Phvul.003G131400.1|PACid:27142835	21 kDa	0.69	35417	43893	34175	40992	35681	31641	1.04774
Phosphoglycerate mutase, 2,3-bisphosphoglycerate-independent	Phvul.008G077900.1|PACid:27155277	61 kDa	0.72	2	0.1	4	4	0.1	0.1	1.45238		pyrophosphorylase 6	Phvul.006G198500.1|PACid:27167321	32 kDa	0.69	26228	34377	32721	31242	26214	43142	0.927712
thioredoxin Y1	Phvul.007G080600.1|PACid:27160155	20 kDa	0.72	3	6	4	4	4	4	1.08333		RNA-binding (RRM/RBD/RNP motifs) family protein	Phvul.007G150700.1|PACid:27158969	30 kDa	0.7	10364	7898.7	9364.8	5037.2	9596.7	10693	1.09084
Matrixin family protein	Phvul.004G021000.1|PACid:27156589	32 kDa	0.72	13	0.1	18	0.1	0.1	21	1.46698		nuclear encoded CLP protease 5	Phvul.007G213700.1|PACid:27160580	33 kDa	0.7	21550	14561	100	23287	25829	100	0.735757
cyclophilin 2Unknown-2	Phvul.007G001100.1|PACid:27159556	29 kDa	0.72	6	11	10	13	11	6	0.9		Aldolase superfamily protein	Phvul.008G282000.1|PACid:27155233	39 kDa	0.7	14352	9573.5	15351	100	9077.6	21939	1.26224
FtsH extracellular protease family	Phvul.002G190900.1|PACid:27168562	75 kDa	0.72	0.1	9	0.1	0.1	5	0.1	1.76923		P-loop containing nucleoside triphosphate hydrolases superfamily protein	Phvul.010G040800.1|PACid:27141206	23 kDa	0.7	100	100	12218	100	100	22968	0.535998
photosystem I subunit D-2	Phvul.007G055900.1|PACid:27159988	23 kDa	0.72	31	59	35	46	43	46	0.925926		ATPase, F1 complex, gamma subunit protein	Phvul.006G149700.1|PACid:27166321 (+1)	41 kDa	0.71	14155	12444	100	17765	17682	100	0.75109
Glyoxalase/Bleomycin resistance protein/Dioxygenase superfamily protein	Phvul.002G310700.1|PACid:27167538	39 kDa	0.73	4	7	13	7	6	8	1.14286		Unknown	Phvul.009G082000.1|PACid:27146310	25 kDa	0.71	100	7039.4	100	12793	100	100	0.557177
Hyaluronan / mRNA binding family	Phvul.008G047300.1|PACid:27154232	39 kDa	0.73	4	3	4	0.1	0.1	8	1.34146		ARF-GAP domain 8	Phvul.003G285000.1|PACid:27143812	43 kDa	0.71	100	100	8317.2	5597.8	100	6989.2	0.671333
photosystem II subunit O-2	Phvul.002G024000.1|PACid:27170025	35 kDa	0.73	58	85	69	77	72	72	0.959276		Ribosomal protein S13/S18 family	Phvul.007G080500.1|PACid:27160297 (+1)	18 kDa	0.72	16984	100	100	100	100	9430.2	1.78439
Bacterial sec-independent translocation protein mttA/Hcf1Unknown6	Phvul.007G073200.1|PACid:27158580	26 kDa	0.73	6	4	9	11	8	3	0.863636		Kunitz family trypsin and protease inhibitor protein	Phvul.004G137600.1|PACid:27157016	23 kDa	0.72	100	100	31896	100	100	18027	1.7609
RmlC-like cupins superfamily protein	Phvul.007G113400.1|PACid:27159828	11 kDa	0.74	9	11	12	17	10	8	0.914286		Lactoylglutathione lyase / glyoxalase I family protein	Phvul.008G136900.1|PACid:27153556	17 kDa	0.72	22628	100	22652	13698	20056	20776	0.832202
ethylene-forming enzyme	Phvul.008G214200.1|PACid:27155644	36 kDa	0.74	12	0.1	0.1	0.1	0.1	7	1.69444		Granulin repeat cysteine protease family protein	Phvul.001G024500.1|PACid:27162248	51 kDa	0.72	17936	15605	20672	17956	16377	22571	0.95271
rotamase CYP 4	Phvul.001G219400.1|PACid:27164761	28 kDa	0.74	6	12	7	8	8	7	1.08696		chaperonin-6Unknownalpha	Phvul.011G082600.1|PACid:27152566	62 kDa	0.73	17219	15523	18047	18240	14234	16765	1.03148
post-illumination chlorophyll fluorescence increase	Phvul.010G156300.1|PACid:27141410	30 kDa	0.75	0.1	7	0.1	6	4	0.1	0.712871		Aldolase-type TIM barrel family protein	Phvul.005G051800.1|PACid:27150154	41 kDa	0.73	14865	18202	21501	15049	21013	21646	0.945588
ascorbate peroxidase 1	Phvul.011G071300.1|PACid:27150621	27 kDa	0.75	19	23	32	23	15	30	1.08824		rubredoxin family protein	Phvul.002G037500.1|PACid:27170020	29 kDa	0.73	100	36829	18826	24351	23168	19903	0.826956
Unknown	Phvul.009G082000.1|PACid:27146310	25 kDa	0.75	0.1	5	0.1	3	0.1	0.1	1.625		ankyrin repeat-containing 2B	Phvul.005G006400.1|PACid:27149778	37 kDa	0.73	10562	13921	22621	16710	7250.2	17727	1.12994
cAMP-regulated phosphoprotein 19-related protein	Phvul.005G054800.1|PACid:27149192	13 kDa	0.75	0.1	0.1	3	5	0.1	0.1	0.615385		cAMP-regulated phosphoprotein 19-related protein	Phvul.005G054800.1|PACid:27149192	13 kDa	0.73	100	100	12504	7209	100	100	1.71467
chitinase A	Phvul.004G101500.1|PACid:27158091	32 kDa	0.75	3	0.1	0.1	0.1	0.1	5	0.615385		Peroxidase superfamily protein	Phvul.007G082700.1|PACid:27161670	39 kDa	0.73	100	12008	100	100	100	21052	0.57444
lysm domain GPI-anchored protein 2 precursor	Phvul.002G188800.1|PACid:27170091	39 kDa	0.75	0.1	0.1	3	0.1	0.1	5	0.615385		homolog of carrot EP3-3 chitinase	Phvul.005G155800.1|PACid:27149003	29 kDa	0.73	100	100	11699	100	100	6687.4	1.72765
Metallo-hydrolase/oxidoreductase superfamily protein	Phvul.008G187100.1|PACid:27155701	29 kDa	0.75	0.1	0.1	3	5	0.1	0.1	0.615385		cyclophilin 5	Phvul.006G068200.1|PACid:27167165	22 kDa	0.73	28066	100	100	100	100	15975	1.74751
LYR family of Fe/S cluster biogenesis protein	Phvul.009G002900.1|PACid:27146537	13 kDa	0.75	0.1	0.1	3	0.1	0.1	5	0.615385		Ribosomal protein L1Unknown family protein	Phvul.002G074600.1|PACid:27169727 (+1)	34 kDa	0.75	38418	100	100	100	21236	33641	0.702439
Cystathionine beta-synthase (CBS) family protein	Phvul.002G016800.1|PACid:27170592	25 kDa	0.75	0.1	3	0.1	0.1	0.1	5	0.615385		ethylene-forming enzyme	Phvul.008G214200.1|PACid:27155644	36 kDa	0.75	27251	100	100	100	100	16370	1.65667
Ribosomal protein S7p/S5e family protein	Phvul.002G050300.1|PACid:27169501	10 kDa	0.75	3	0.1	0.1	0.1	0.1	5	0.615385		chloroplastic lipocalin	Phvul.008G265400.1|PACid:27153495	37 kDa	0.75	42810	48233	26317	42040	34257	33769	1.06627
Ribosomal protein L7Ae/L3Unknowne/S12e/Gadd45 family protein	Phvul.008G269000.1|PACid:27156013	14 kDa	0.76	4	0.1	6	3	3	6	0.841667		KH domain-containing protein	Phvul.009G076600.1|PACid:27146084	66 kDa	0.75	12960	14365	14209	15504	13414	13446	0.980408
chaperonin 1Unknown	Phvul.001G120500.1|PACid:27164304	11 kDa	0.76	0.1	7	9	6	4	9	0.847368		glutamate-1-semialdehyde 2,1-aminomutase 2	Phvul.009G118500.1|PACid:27146116	50 kDa	0.76	21102	18610	45030	26684	20619	28965	1.11111
sedoheptulose-bisphosphatase	Phvul.001G240200.1|PACid:27164106	42 kDa	0.77	23	37	22	19	33	24	1.07895		dehydratase family	Phvul.006G152700.1|PACid:27164979	64 kDa	0.76	100	100	17301	100	100	28350	0.612995
ribosomal protein L9	Phvul.011G086500.1|PACid:27151903	22 kDa	0.77	5	4	7	6	5	4	1.06667		Mog1/PsbP/DUF1795-like photosystem II reaction center PsbP family protein	Phvul.001G119100.1|PACid:27164285	29 kDa	0.76	100	23422	100	100	37610	100	0.624755
adenylate kinase 1	Phvul.003G209400.1|PACid:27143713	27 kDa	0.77	7	6	4	7	6	5	0.944444		FtsH extracellular protease family	Phvul.002G190900.1|PACid:27168562	75 kDa	0.76	100	11441	100	100	18481	100	0.623147
beta-amylase 5	Phvul.011G107700.1|PACid:27150841	56 kDa	0.77	6	0.1	6	8	7	0.1	0.801325		isopentenyl pyrophosphate:dimethylallyl pyrophosphate isomerase 2	Phvul.L002800.1|PACid:27145205	34 kDa	0.76	100	100	15023	100	100	24607	0.613657
Thioredoxin superfamily protein	Phvul.003G128100.1|PACid:27144461	13 kDa	0.77	0.1	8	0.1	5	0.1	0.1	1.57692		Acyl transferase/acyl hydrolase/lysophospholipase superfamily protein	Phvul.010G047000.1|PACid:27141326	46 kDa	0.76	35187	100	32054	28026	22970	27627	0.856505
voltage dependent anion channel 1	Phvul.003G069300.1|PACid:27144157	30 kDa	0.78	4	9	0.1	0.1	7	3	1.29703		ribulose-bisphosphate carboxylases	Phvul.011G089000.1|PACid:27150529	10 kDa	0.77	25239	27750	33061	25179	31710	26262	1.03486
Thioredoxin superfamily protein	Phvul.006G072600.1|PACid:27167441	30 kDa	0.78	0.1	5	5	5	0.1	3	1.24691		photosystem I subunit D-2	Phvul.007G055900.1|PACid:27159988	23 kDa	0.77	21850	24379	20190	23289	16890	23867	1.03705
nodulin-related protein 1	Phvul.002G168000.1|PACid:27169194	12 kDa	0.78	18	29	37	25	27	27	1.06329		rotamase CYP 4	Phvul.001G219400.1|PACid:27164761	28 kDa	0.77	34484	34377	45197	39528	37930	32622	1.03614
Stress responsive alpha-beta barrel domain protein	Phvul.009G228300.1|PACid:27147436	27 kDa	0.79	8	7	13	7	4	14	1.12		chitinase A	Phvul.004G101500.1|PACid:27158091	32 kDa	0.77	12858	100	100	100	100	20315	0.63651
Ribosomal protein S21 family protein	Phvul.001G094500.1|PACid:27164512	20 kDa	0.8	7	0.1	0.1	4	2	3	0.8		purple acid phosphatase 26	Phvul.003G170600.1|PACid:27145129	50 kDa	0.77	100	100	24830	100	100	15670	1.57719
ATP synthase epsilon chain	Phvul.010G031400.1|PACid:27141616	8 kDa	0.8	8	14	8	8	12	12	0.9375		FASCICLIN-like arabinogalactan 2	Phvul.008G288800.1|PACid:27153618	43 kDa	0.78	20597	15061	12683	16499	19834	14513	0.950734
peptide met sulfoxide reductase 4	Phvul.008G267100.1|PACid:27155730	29 kDa	0.8	0.1	4	0.1	6	0.1	0.1	0.677419		4Unknowns ribosomal protein SA B	Phvul.010G125100.1|PACid:27140930 (+2)	34 kDa	0.78	20702	13254	25130	22172	20421	19647	0.949325
homolog of carrot EP3-3 chitinase	Phvul.011G051500.1|PACid:27150682	26 kDa	0.8	0.1	2	0.1	0.1	0.1	3	0.6875		31-kDa RNA binding protein	Phvul.009G171500.1|PACid:27147461	33 kDa	0.78	19513	18461	25455	17097	22450	21447	1.03992
polygalacturonase inhibiting protein 1	Phvul.002G201800.1|PACid:27170678	36 kDa	0.8	0.1	0.1	3	0.1	0.1	2	1.45455		lysm domain GPI-anchored protein 2 precursor	Phvul.002G188800.1|PACid:27170091	39 kDa	0.78	100	100	10939	100	100	16775	0.6562
Ribosomal protein L11 family protein	Phvul.011G079400.1|PACid:27152477	18 kDa	0.8	9	6	6	6	6	8	1.05		adenylate kinase 1	Phvul.003G209400.1|PACid:27143713	27 kDa	0.78	17000	19303	23343	21000	20247	20072	0.972716
isopentenyl pyrophosphate:dimethylallyl pyrophosphate isomerase 2	Phvul.L002800.1|PACid:27145205	34 kDa	0.8	0.1	0.1	6	0.1	0.1	4	1.47619		Unknown	Phvul.009G006700.1|PACid:27148259	18 kDa	0.78	100	7506.5	100	11648	100	100	0.650447
Nascent polypeptide-associated complex (NAC), alpha subunit family protein	Phvul.001G117000.1|PACid:27163457	22 kDa	0.8	4	0.1	8	0.1	5	10	0.801325		lipid transfer protein 6	Phvul.010G069500.1|PACid:27140960	13 kDa	0.78	100	100	15751	10264	100	100	1.52437
Peroxidase superfamily protein	Phvul.006G129700.1|PACid:27165752	39 kDa	0.8	0.1	2	0.1	0.1	0.1	3	0.6875		lipid transfer protein 1	Phvul.010G066400.1|PACid:27140848	12 kDa	0.79	29187	37204	16612	22188	23574	45463	0.909871
non-photochemical quenching 1	Phvul.006G108200.1|PACid:27165356 (+1)	54 kDa	0.8	0.1	2	0.1	0.1	3	0.1	0.6875		Plastid-lipid associated protein PAP / fibrillin family protein	Phvul.006G214200.1|PACid:27167014	26 kDa	0.79	100	17953	33298	22277	100	18967	1.24204
root hair specific 19	Phvul.003G236500.1|PACid:27142628	36 kDa	0.8	3	0.1	0.1	0.1	0.1	2	1.45455		Protein of unknown function, DUF642	Phvul.005G024100.1|PACid:27149942	40 kDa	0.79	100	100	5087.2	100	100	7705.3	0.668817
aldehyde dehydrogenase 11A3	Phvul.003G157200.1|PACid:27144178	53 kDa	0.8	0.1	4	0.1	0.1	0.1	6	0.677419		chloroplast heat shock protein 7Unknown-2	Phvul.006G219600.1|PACid:27166564	74 kDa	0.8	18878	16489	18709	14983	17604	20132	1.02574
ferredoxin-NADP(+)-oxidoreductase 2	Phvul.002G108000.1|PACid:27167711	41 kDa	0.81	10	17	6	6	13	11	1.1		glutamine synthetase 2	Phvul.006G155800.1|PACid:27167409 (+1)	47 kDa	0.81	20741	14146	18130	13836	12652	23554	1.05945
Leucine-rich repeat (LRR) family protein	Phvul.002G092200.1|PACid:27169164	50 kDa	0.81	11	7	10	7	0.1	17	1.16183		thylakoid rhodanese-like	Phvul.010G112100.1|PACid:27140271	47 kDa	0.81	17321	10920	30417	3864.2	39836	24315	0.862425
CLPC homologue 1	Phvul.009G162100.1|PACid:27145996	102 kDa	0.81	7	0.1	4	4	5	0.1	1.21978		6UnknownS acidic ribosomal protein family	Phvul.007G230200.1|PACid:27159091	11 kDa	0.81	21588	100	21986	7846.9	7893.9	21346	1.17762
translocase of the inner mitochondrial membrane 13	Phvul.006G006100.1|PACid:27166548	9 kDa	0.81	0.1	2	3	3	3	0.1	0.836066		Nascent polypeptide-associated complex (NAC), alpha subunit family protein	Phvul.001G117000.1|PACid:27163457	22 kDa	0.81	21127	100	22362	100	18850	17448	1.19757
Ribosomal protein L3Unknown/L7 family protein	Phvul.008G255000.1|PACid:27153562	28 kDa	0.81	7	0.1	5	5	0.1	5	1.19802		Aldolase-type TIM barrel family protein	Phvul.006G171100.1|PACid:27166056	33 kDa	0.81	12032	100	29898	100	14768	19147	1.23563
translationally controlled tumor protein	Phvul.009G248700.1|PACid:27147167	19 kDa	0.82	10	0.1	9	0.1	8	8	1.18634		photosystem II subunit O-2	Phvul.003G249800.1|PACid:27144070	35 kDa	0.81	30205	30068	23786	28055	36793	22752	0.959578
purple acid phosphatase 26	Phvul.003G170600.1|PACid:27145129	50 kDa	0.82	0.1	0.1	7	0.1	0.1	10	0.705882		Transducin/WD4Unknown repeat-like superfamily protein	Phvul.002G070400.1|PACid:27167818	36 kDa	0.82	13501	13818	14902	12477	9953	18030	1.04352
rubisco activase	Phvul.001G234300.1|PACid:27161781	48 kDa	0.82	50	59	43	55	48	45	1.02703		rubisco activase	Phvul.001G234300.1|PACid:27161781	48 kDa	0.82	22066	35893	32908	25901	32737	28853	1.03859
photosystem II stability/assembly factor, chloroplast (HCF136)	Phvul.011G029800.1|PACid:27152681 (+1)	43 kDa	0.83	7	7	3	0.1	6	9	1.12583		chloroplast RNA-binding protein 33	Phvul.001G196700.1|PACid:27162780	34 kDa	0.83	13611	10434	17408	100	15884	20950	1.12235
cold-regulated 47	Phvul.009G004400.1|PACid:27147548	23 kDa	0.83	6	0.1	7	6	0.1	5	1.18018		Ribosomal protein S5 family protein	Phvul.002G229700.1|PACid:27168387	32 kDa	0.83	20157	6764.4	100	100	100	20695	1.2932
Unknown	Phvul.006G142900.1|PACid:27166865	17 kDa	0.83	0.1	4	8	6	0.1	4	1.19802		photosystem II subunit P-1	Phvul.008G196500.1|PACid:27155546	28 kDa	0.83	28013	23378	26757	30498	23183	26223	0.978024
chloroplastic lipocalin	Phvul.008G265400.1|PACid:27153495	37 kDa	0.83	3	4	7	3	4	6	1.07692		thioredoxin F2	Phvul.008G053300.1|PACid:27153949	20 kDa	0.83	21213	20846	33239	19213	28347	24434	1.04589
KH domain-containing protein	Phvul.009G076600.1|PACid:27146084	66 kDa	0.83	7	7	9	10	6	6	1.04545		profilin 2	Phvul.002G307600.1|PACid:27169401	14 kDa	0.84	14268	3728.1	5286.5	12012	7480	6237.5	0.904899
proline-rich family protein	Phvul.005G018300.1|PACid:27149753	24 kDa	0.83	0.1	0.1	7	5	0.1	0.1	1.38462		voltage dependent anion channel 1	Phvul.003G069300.1|PACid:27144157	30 kDa	0.84	37888	24976	100	100	24307	29255	1.17334
ribosomal protein S1	Phvul.003G118600.1|PACid:27143910	45 kDa	0.83	7	0.1	9	0.1	8	11	0.842932		Hyaluronan / mRNA binding family	Phvul.010G049300.1|PACid:27140350	38 kDa	0.84	100	100	23982	100	21023	9363.1	0.793214
acyl carrier protein 4	Phvul.002G282800.1|PACid:27167585	18 kDa	0.84	13	12	8	11	11	10	1.03125		expansin-like B1	Phvul.003G228000.1|PACid:27144361	27 kDa	0.84	100	100	8744.4	100	100	12016	0.732187
thioredoxin X	Phvul.007G015500.1|PACid:27160930	20 kDa	0.84	5	4	0.1	3	3	4	0.91		uridylyltransferase-related	Phvul.005G181700.1|PACid:27149150	30 kDa	0.85	13709	18596	15705	10707	15700	19752	1.0401
ribosomal protein L12-C	Phvul.011G027700.1|PACid:27151838 (+1)	25 kDa	0.84	14	13	21	15	15	20	0.96		UDP-glucose pyrophosphorylase 2	Phvul.008G240600.1|PACid:27154606	52 kDa	0.85	23807	18349	11051	100	24571	23296	1.10924
thylakoidal ascorbate peroxidase	Phvul.009G126500.1|PACid:27147739 (+1)	48 kDa	0.84	0.1	4	11	13	3	2	0.838889		Unknown	Phvul.002G299900.1|PACid:27170530	16 kDa	0.85	16082	100	16078	12255	15661	100	1.15148
dehydroascorbate reductase 1	Phvul.001G230400.1|PACid:27163271	29 kDa	0.84	0.1	5	7	7	0.1	7	0.858156		HAD superfamily, subfamily IIIB acid phosphatase	Phvul.004G174200.1|PACid:27156865	28 kDa	0.85	11870	100	100	100	100	8936.7	1.32105
26S proteasome regulatory complex, non-ATPase subcomplex, Rpn2/Psmd1 subunit	Phvul.002G324700.1|PACid:27170952	109 kDa	0.85	0.1	0.1	4	2	0.1	3	0.823529		glyceraldehyde 3-phosphate dehydrogenase A subunit	Phvul.001G098100.1|PACid:27162772	43 kDa	0.85	20717	24488	23145	22318	23650	21633	1.01108
protein containing PDZ domain, a K-box domain, and a TPR region	Phvul.002G247200.1|PACid:27167565	37 kDa	0.85	8	12	11	13	9	10	0.96875		Unknown	Phvul.004G172100.1|PACid:27156725	34 kDa	0.85	100	100	10050.8	100	100	7490.6	1.3329
GDP-D-mannose 3\',5\'-epimerase	Phvul.006G101600.1|PACid:27165995 (+1)	42 kDa	0.85	4	0.1	0.1	0.1	0.1	3	1.3125		Ubiquinol-cytochrome C reductase hinge protein	Phvul.006G209400.1|PACid:27167072	8 kDa	0.85	100	100	8052.4	100	100	6082.8	1.31349
Subtilase family protein	Phvul.008G228700.1|PACid:27153723 (+1)	80 kDa	0.85	5	0.1	14	0.1	0.1	15	1.25658		catalase 2	Phvul.009G011100.1|PACid:27146649	57 kDa	0.86	20271	31194	29631	100	42739	31006	1.09819
homolog of Synechocystis YCF37	Phvul.002G023600.1|PACid:27169948	17 kDa	0.85	0.1	4	0.1	0.1	2	3	0.823529		Rubredoxin-like superfamily protein	Phvul.010G153300.1|PACid:27140618	18 kDa	0.86	100	100	15467	100	100	11784	1.30733
P-loop containing nucleoside triphosphate hydrolases superfamily protein	Phvul.010G040800.1|PACid:27141206	23 kDa	0.85	0.1	0.1	3	0.1	0.1	4	0.761905		HAD superfamily, subfamily IIIB acid phosphatase	Phvul.010G144300.1|PACid:27140721	29 kDa	0.86	17263	100	29970	19729	11603	21111	0.902561
ARF-GAP domain 8	Phvul.003G285000.1|PACid:27143812	43 kDa	0.85	0.1	0.1	9	4	0.1	3	1.29577		dehydroascorbate reductase 1	Phvul.001G230400.1|PACid:27163271	29 kDa	0.86	100	22800	17441	23349	100	22863	0.87107
Peroxidase superfamily protein	Phvul.007G082700.1|PACid:27161670	39 kDa	0.85	0.1	3	0.1	0.1	0.1	4	0.761905		Unknown	Phvul.003G059800.1|PACid:27142374	17 kDa	0.87	11635	14554	12487	21706	100	13562	1.09353
Hyaluronan / mRNA binding family	Phvul.010G049300.1|PACid:27140350	38 kDa	0.85	0.1	0.1	4	0.1	3	2	0.823529		beta-amylase 5	Phvul.011G107700.1|PACid:27150841	56 kDa	0.87	9768.8	100	18671	14089	10697	100	1.14682
GDSL-like Lipase/Acylhydrolase superfamily protein	Phvul.010G143600.1|PACid:27140498	41 kDa	0.85	0.1	0.1	4	0.1	0.1	3	1.3125		proline-rich family protein	Phvul.005G018300.1|PACid:27149753	24 kDa	0.87	100	100	17730	22510	100	100	0.78952
lipoxygenase 2	Phvul.011G056500.1|PACid:27151588	103 kDa	0.85	6	0.1	7	0.1	3	8	1.18018		GDSL-like Lipase/Acylhydrolase superfamily protein	Phvul.010G143600.1|PACid:27140498	41 kDa	0.87	100	100	10313	100	100	13209	0.784026
NAD(P)-linked oxidoreductase superfamily protein	Phvul.010G017100.1|PACid:27141117	35 kDa	0.85	0.1	0.1	3	0.1	0.1	4	0.761905		Haloacid dehalogenase-like hydrolase (HAD) superfamily protein	Phvul.009G169900.1|PACid:27147379 (+2)	37 kDa	0.87	27702	21322	100	100	27300	28077	0.885484
dehydroascorbate reductase 2	Phvul.007G009800.1|PACid:27158987	23 kDa	0.86	9	7	11	8	8	12	0.964286		6UnknownS acidic ribosomal protein family	Phvul.001G188200.1|PACid:27162099	23 kDa	0.88	12762	11622	20100	14221	15300	13702	1.02917
Ribonuclease E inhibitor RraA/Dimethylmenaquinone methyltransferase	Phvul.006G196200.1|PACid:27167308	30 kDa	0.86	9	10	13	9	9	13	1.03226		monodehydroascorbate reductase 1	Phvul.007G230300.1|PACid:27160270	47 kDa	0.88	11142	13358	12537	11404	13217	12012	1.01103
Lactoylglutathione lyase / glyoxalase I family protein	Phvul.008G136900.1|PACid:27153556	17 kDa	0.86	10	0.1	10	7	5	10	0.913636		U2 small nuclear ribonucleoprotein A	Phvul.003G001500.1|PACid:27142150 (+1)	32 kDa	0.88	9605.9	10065.4	7152.7	100	13354	11286	1.08424
Unknown	Phvul.010G014200.1|PACid:27141106	21 kDa	0.87	4	0.1	3	5	0.1	3	0.876543		mitochondrial HSO7Unknown 2	Phvul.002G215800.1|PACid:27170609	73 kDa	0.88	100	100	11945	100	100	15143	0.791566
chloroplast RNA-binding protein 31B	Phvul.003G206700.1|PACid:27144868	34 kDa	0.87	14	16	15	12	14	18	1.02273		FAD/NAD(P)-binding oxidoreductase	Phvul.007G035000.1|PACid:27159037	31 kDa	0.88	100	11657	100	100	100	14694	0.796092
Granulin repeat cysteine protease family protein	Phvul.001G024500.1|PACid:27162248	51 kDa	0.87	23	24	31	28	21	31	0.975		eukaryotic elongation factor 5A-1	Phvul.009G184600.1|PACid:27146450	18 kDa	0.89	25750	22493	22367	27125	9356.8	31048	1.04561
6UnknownS acidic ribosomal protein family	Phvul.005G126000.1|PACid:27149505	11 kDa	0.87	5	0.1	13	6	3	7	1.13125		lipoamide dehydrogenase 1	Phvul.009G254900.1|PACid:27146148	59 kDa	0.89	11929	10740	16103	13100	11659	13253	1.01999
membrane steroid binding protein 1	Phvul.007G068900.1|PACid:27158860	23 kDa	0.87	6	2	8	5	5	7	0.941176		Metallo-hydrolase/oxidoreductase superfamily protein	Phvul.008G187100.1|PACid:27155701	29 kDa	0.89	100	100	25231	31364	100	100	0.805696
glutathione reductase	Phvul.007G177200.1|PACid:27159877	59 kDa	0.87	3	4	0.1	3	5	0.1	0.876543		Peroxidase superfamily protein	Phvul.006G129700.1|PACid:27165752	39 kDa	0.89	100	12837	100	100	100	15893	0.810104
ferredoxin-NADP(+)-oxidoreductase 1	Phvul.003G263200.1|PACid:27142088	41 kDa	0.88	12	18	8	9	18	9	1.05556		lipoxygenase 2	Phvul.011G056500.1|PACid:27151588	103 kDa	0.89	21600	100	15232	100	20177	20596	0.903579
thioredoxin-dependent peroxidase 1	Phvul.004G166100.1|PACid:27158250	17 kDa	0.88	12	10	0.1	4	10	10	0.920833		Coproporphyrinogen III oxidase	Phvul.008G289900.1|PACid:27155337	44 kDa	0.89	32391	100	100	100	26255	100	1.23194
acyl-CoA-binding protein 6	Phvul.002G127700.1|PACid:27168742	10 kDa	0.88	13	24	18	24	16	17	0.964912		RNA-binding (RRM/RBD/RNP motifs) family protein	Phvul.009G033600.1|PACid:27145380 (+1)	34 kDa	0.9	12090	16241	100	100	24324	100	1.15931
chloroplast signal recognition particle component (CAO)	Phvul.011G025300.1|PACid:27151403	46 kDa	0.88	5	0.1	0.1	0.1	0.1	4	1.2381		rotamase CYP 3	Phvul.011G026900.1|PACid:27152345	18 kDa	0.9	21798	26016	22255	23055	28844	19427	0.982377
Translation initiation factor eIF3 subunit	Phvul.004G141100.1|PACid:27157679	26 kDa	0.88	0.1	0.1	5	0.1	0.1	4	1.2381		non-photochemical quenching 1	Phvul.006G108200.1|PACid:27165356 (+1)	54 kDa	0.9	100	8144.1	100	100	6737.1	100	1.20282
Aldolase-type TIM barrel family protein	Phvul.006G171100.1|PACid:27166056	33 kDa	0.89	4	0.1	5	0.1	6	4	0.90099		6UnknownS acidic ribosomal protein family	Phvul.005G126000.1|PACid:27149505	11 kDa	0.9	13308	100	15920	7527.8	10511	13293	0.936046
chitinase A	Phvul.011G167300.1|PACid:27150829	31 kDa	0.89	4	0.1	7	3	2	5	1.11		Unknown	Phvul.007G163900.1|PACid:27159716	20 kDa	0.9	100	12786	100	100	15408	100	0.832009
purple acid phosphatase 26	Phvul.003G170500.2|PACid:27143543	53 kDa	0.9	3	2	7	4	0.1	7	1.08108		cytochrome C oxidase 6B	Phvul.008G176600.1|PACid:27154052	20 kDa	0.91	4870.5	3201.8	10935	5840.4	6863.1	5415.5	1.04903
RAB GTPase 11C	Phvul.006G220200.1|PACid:27166794	24 kDa	0.9	0.1	0.1	7	2	0.1	4	1.18033		phosphoribulokinase	Phvul.002G133100.1|PACid:27167548	45 kDa	0.91	25480	23085	28108	23244	25688	28477	0.990492
Kunitz family trypsin and protease inhibitor protein	Phvul.011G169900.1|PACid:27152671	23 kDa	0.9	8	0.1	11	4	0.1	13	1.11696		fibrillin	Phvul.006G145100.1|PACid:27165511	34 kDa	0.91	100	8744.4	100	100	7387.8	100	1.17879
Histone superfamily protein	Phvul.011G066500.1|PACid:27150778	16 kDa	0.9	7	0.1	3	0.1	4	5	1.10989		Calcium-binding EF-hand family protein	Phvul.002G329300.1|PACid:27167898	19 kDa	0.91	100	100	15279	100	100	12893	1.18223
homolog of carrot EP3-3 chitinase	Phvul.005G155800.1|PACid:27149003	29 kDa	0.9	0.1	0.1	6	0.1	0.1	5	1.19231		membrane steroid binding protein 1	Phvul.007G068900.1|PACid:27158860	23 kDa	0.91	4961.4	4932.3	13679	7568.5	4142.3	10598	1.05665
Tetratricopeptide repeat (TPR)-like superfamily protein	Phvul.001G235600.1|PACid:27162446	24 kDa	0.91	19	16	23	22	20	15	1.01754		malate dehydrogenase	Phvul.003G189700.1|PACid:27144002	43 kDa	0.91	100	7852.4	100	100	100	9344	0.843713
glycine-rich RNA-binding protein 3	Phvul.003G184700.1|PACid:27144667	29 kDa	0.91	0.1	7	6	7	2	5	0.935714		DnaJ/Hsp4Unknown cysteine-rich domain superfamily protein	Phvul.003G164500.1|PACid:27144762	14 kDa	0.92	35883	100	41590	41768	12830	18216	1.06536
Haloacid dehalogenase-like hydrolase (HAD) superfamily protein	Phvul.009G169900.1|PACid:27147379 (+2)	37 kDa	0.91	4	7	0.1	0.1	6	4	1.09901		Subtilase family protein	Phvul.010G128600.1|PACid:27141368	83 kDa	0.92	12794	8843.8	14633	11881	9914.1	13792	1.01921
copper/zinc superoxide dismutase 2	Phvul.011G086300.1|PACid:27152804	21 kDa	0.92	21	41	63	49	35	37	1.03306		Pentapeptide repeat-containing protein	Phvul.002G061100.1|PACid:27170040	30 kDa	0.92	20393	19651	23995	16744	22247	25969	0.985822
photosystem II subunit Q-2	Phvul.010G052300.1|PACid:27141041	24 kDa	0.92	44	67	44	61	46	45	1.01974		basic transcription factor 3	Phvul.011G041900.1|PACid:27150706	17 kDa	0.92	21605	100	14509	100	14518	18891	1.08072
isopropylmalate dehydrogenase 2	Phvul.005G181600.1|PACid:27148470	44 kDa	0.92	8	3	14	9	9	8	0.961538		Nucleoside diphosphate kinase family protein	Phvul.002G297900.1|PACid:27170671	26 kDa	0.92	100	18637	100	100	15967	100	1.16515
photosystem I subunit H2	Phvul.010G148800.1|PACid:27139821	15 kDa	0.93	17	40	19	29	22	27	0.974359		root hair specific 19	Phvul.003G236500.1|PACid:27142628	36 kDa	0.92	15952	100	100	100	100	18586	0.859789
ADP-ribosylation factor A1F	Phvul.001G215400.1|PACid:27162755 (+4)	21 kDa	0.93	2	0.1	9	0.1	3	7	1.09901		NAD(P)-linked oxidoreductase superfamily protein	Phvul.010G017100.1|PACid:27141117	35 kDa	0.92	100	100	12429	100	100	10631	1.166
Rho termination factor	Phvul.007G192400.1|PACid:27159645	41 kDa	0.93	0.1	0.1	10	0.1	5	6	0.918919		ATPase, V1 complex, subunit B protein	Phvul.008G050000.1|PACid:27155571	54 kDa	0.93	15726	100	11340	100	12549	16559	0.930088
SOUL heme-binding family protein	Phvul.011G173900.1|PACid:27150755	25 kDa	0.93	5	11	16	13	7	11	1.03226		phosphoglycerate kinase	Phvul.005G050800.1|PACid:27148357 (+1)	42 kDa	0.93	17196	15307	23569	13145	20249	21611	1.0194
photosystem II subunit O-2	Phvul.003G249800.1|PACid:27144070	35 kDa	0.93	51	82	70.1	81	66	59	0.985922		GDSL-like Lipase/Acylhydrolase superfamily protein	Phvul.006G107300.1|PACid:27166126	40 kDa	0.93	20568	11019	21106	15798	16632	21293	0.980828
nascent polypeptide-associated complex subunit alpha-like protein 2	Phvul.009G038400.1|PACid:27146681	24 kDa	0.95	10	0.1	9	0.1	9	11	0.950249		translocase of the inner mitochondrial membrane 13	Phvul.006G006100.1|PACid:27166548	9 kDa	0.93	100	19235	18375	22481	17673	100	0.936801
Acyl transferase/acyl hydrolase/lysophospholipase superfamily protein	Phvul.010G047000.1|PACid:27141326	46 kDa	0.95	7	0.1	14	6	4	12	0.959091		glutathione reductase	Phvul.007G177200.1|PACid:27159877	59 kDa	0.93	12096	9774.9	100	9801.3	13548	100	0.936953
Unknown	Phvul.004G031300.1|PACid:27156615	52 kDa	0.96	7	0.1	12	0.1	0.1	18	1.04945		isopropylmalate dehydrogenase 2	Phvul.005G181600.1|PACid:27148470	44 kDa	0.93	15871	22421	15836	18606	20389	15884	0.986315
NAD(P)-binding Rossmann-fold superfamily protein	Phvul.010G011300.1|PACid:27140467	28 kDa	1	2	8	5	5	4	6	1		Nucleotide-diphospho-sugar transferases superfamily protein	Phvul.003G090900.1|PACid:27143119	34 kDa	0.93	14959	100	100	100	100	13057	1.14347
related to ubiquitin 1	Phvul.005G060100.1|PACid:27150216	17 kDa	1	21	9	18	16	10	22	1		hydroxyproline-rich glycoprotein family protein	Phvul.006G083300.1|PACid:27165339	47 kDa	0.93	100	100	20525	100	18100	100	1.13251
serine hydroxymethyltransferase 4	Phvul.001G266600.1|PACid:27162877 (+1)	52 kDa	1	10	0.1	6	3	6	7	1.00625		Cytosol aminopeptidase family protein	Phvul.009G195000.1|PACid:27146348	60 kDa	0.94	15886	19036	100	100	12754	20144	1.06134
DegP protease 1	Phvul.004G013600.1|PACid:27156458	45 kDa	1	2	16	0.1	6	7	5	1.00556		LYR family of Fe/S cluster biogenesis protein	Phvul.009G002900.1|PACid:27146537	13 kDa	0.94	100	100	7145.8	100	100	7945.8	0.90179
BolA-like family protein	Phvul.007G281100.1|PACid:27159858 (+1)	18 kDa	1	4	5	5	5	5	4	1		hydroxymethylbilane synthase	Phvul.002G034500.1|PACid:27168859	42 kDa	0.95	20156	15511	23119	15595	18870	25022	0.988216
P-loop containing nucleoside triphosphate hydrolases superfamily protein	Phvul.006G178400.1|PACid:27167211	46 kDa	1	6	5	8	0.1	9	10	0.994764		manganese superoxide dismutase 1	Phvul.009G141600.1|PACid:27146654	27 kDa	0.95	14758	16962	100	100	12115	18069	1.05072
endoribonuclease L-PSP family protein	Phvul.006G043400.1|PACid:27166401	20 kDa	1	3	4	0.1	3	0.1	4	1		Thioredoxin superfamily protein	Phvul.006G072600.1|PACid:27167441	30 kDa	0.95	100	19819	15778	18588	100	18600	0.957332
nucleoside diphosphate kinase 2	Phvul.003G208500.1|PACid:27143746	25 kDa	1	7	10	5	10	7	5	1		Stress responsive alpha-beta barrel domain protein	Phvul.009G228300.1|PACid:27147436	27 kDa	0.95	16331	17755	15795	9040.9	9956.9	29519	1.02812
Lactate/malate dehydrogenase family protein	Phvul.011G159000.1|PACid:27151726	36 kDa	1	13	25	23	27	16	18	1		NADH-ubiquinone oxidoreductase B18 subunit, putative	Phvul.007G019800.1|PACid:27158880	12 kDa	0.95	100	100	19897	21685	100	100	0.9183
peroxisomal NAD-malate dehydrogenase 2	Phvul.002G216800.1|PACid:27167607 (+1)	37 kDa	1	3	19	5	8	12	7	1		calreticulin 1a	Phvul.007G200800.1|PACid:27161178	48 kDa	0.96	17603	10385	15435	100	21073	21196	1.02488
Unknown	Phvul.006G047400.1|PACid:27167346	11 kDa	1	7	14	12	11	10	12	1		Bacterial sec-independent translocation protein mttA/Hcf1Unknown6	Phvul.007G073200.1|PACid:27158580	26 kDa	0.96	7834.6	4069.4	13007	8239.8	8673	8432.5	0.982865
RAB GTPase homolog G3F	Phvul.011G046100.1|PACid:27150539	23 kDa	1	0.1	0.1	6	2	0.1	4	1.01639		Ribosomal protein L3Unknown/L7 family protein	Phvul.008G255000.1|PACid:27153562	28 kDa	0.96	23419	100	17213	19226	100	19901	1.03837
CLP protease P4	Phvul.002G128500.1|PACid:27168214	33 kDa	1	2	0.1	0.1	0.1	2	0.1	1		ribosomal protein S1	Phvul.003G118600.1|PACid:27143910	45 kDa	0.96	17060	100	11965	100	14322	13625	1.03844
Aldolase superfamily protein	Phvul.009G127100.1|PACid:27146420	45 kDa	1	10	9	10	9	9	11	1		chloroplast thylakoid lumen protein	Phvul.003G166300.1|PACid:27142618	35 kDa	0.97	9890.3	16812	8650.8	100	21196	14765	0.980369
cyclophilin 5	Phvul.006G068200.1|PACid:27167165	22 kDa	1	3	0.1	0.1	0.1	0.1	3	1		S-adenosylmethionine synthetase 1	Phvul.001G216700.1|PACid:27164697	43 kDa	0.97	27888	100	100	100	12414	16802	0.958112
Unknown	Phvul.009G006700.1|PACid:27148259	18 kDa	1	0.1	3	0.1	3	0.1	0.1	1		Bifunctional inhibitor/lipid-transfer protein/seed storage 2S albumin superfamily protein	Phvul.001G050300.1|PACid:27164014	12 kDa	0.97	52004	36473	36875	48966	28478	47038	1.00699
lipid transfer protein 6	Phvul.010G069500.1|PACid:27140960	13 kDa	1	0.1	0.1	3	3	0.1	0.1	1		Stress responsive alpha-beta barrel domain protein	Phvul.003G132200.1|PACid:27143060	28 kDa	0.97	27779	100	100	26018	100	100	1.06717
Protein of unknown function, DUF642	Phvul.005G024100.1|PACid:27149942	40 kDa	1	0.1	0.1	6	0.1	0.1	6	1		Thioredoxin superfamily protein	Phvul.003G128100.1|PACid:27144461	13 kDa	0.97	100	12409	100	13148	100	100	0.944636
expansin-like B1	Phvul.003G228000.1|PACid:27144361	27 kDa	1	0.1	0.1	6	0.1	0.1	6	1		aldehyde dehydrogenase 11A3	Phvul.003G157200.1|PACid:27144178	53 kDa	0.97	100	12865	100	100	100	12262	1.04839
Ubiquinol-cytochrome C reductase hinge protein	Phvul.006G209400.1|PACid:27167072	8 kDa	1	0.1	0.1	2	0.1	0.1	2	1		Cystathionine beta-synthase (CBS) family protein	Phvul.002G016800.1|PACid:27170592	25 kDa	0.98	100	17734	100	100	100	17209	1.03016
mitochondrial HSO7Unknown 2	Phvul.002G215800.1|PACid:27170609	73 kDa	1	0.1	0.1	4	0.1	0.1	4	1		nodulin-related protein 1	Phvul.002G168000.1|PACid:27169194	12 kDa	0.98	19913	27392	29235	22784	26074	27916	0.996952
FAD/NAD(P)-binding oxidoreductase	Phvul.007G035000.1|PACid:27159037	31 kDa	1	0.1	3	0.1	0.1	0.1	3	1		chloroplast signal recognition particle component (CAO)	Phvul.011G025300.1|PACid:27151403	46 kDa	0.98	18806	100	100	100	100	19658	0.957095
Coproporphyrinogen III oxidase	Phvul.008G289900.1|PACid:27155337	44 kDa	1	3	0.1	0.1	0.1	3	0.1	1		chitinase A	Phvul.011G167300.1|PACid:27150829	31 kDa	0.98	28230	100	31447	17086	15625	26043	1.01741
Unknown	Phvul.007G163900.1|PACid:27159716	20 kDa	1	0.1	4	0.1	0.1	4	0.1	1		glutathione peroxidase 6	Phvul.002G288700.1|PACid:27169181	26 kDa	0.98	100	100	10950	100	100	10594	1.03298
malate dehydrogenase	Phvul.003G189700.1|PACid:27144002	43 kDa	1	0.1	4	0.1	0.1	0.1	4	1		glutamate synthase 1	Phvul.001G123900.1|PACid:27162883	176 kDa	0.99	11417	11228	14870	14746	10315	12379	1.002
Nucleotide-diphospho-sugar transferases superfamily protein	Phvul.003G090900.1|PACid:27143119	34 kDa	1	3	0.1	0.1	0.1	0.1	3	1		Single hybrid motif superfamily protein	Phvul.002G006000.1|PACid:27171133	18 kDa	0.99	18001	14128	17310	17056	13802	18499	1.00166
hydroxyproline-rich glycoprotein family protein	Phvul.006G083300.1|PACid:27165339	47 kDa	1	0.1	0.1	3	0.1	3	0.1	1		Ribosomal protein S7p/S5e family protein	Phvul.002G050300.1|PACid:27169501	10 kDa	0.99	29083	100	100	100	100	29395	0.989458
NADH-ubiquinone oxidoreductase B18 subunit, putative	Phvul.007G019800.1|PACid:27158880	12 kDa	1	0.1	0.1	3	3	0.1	0.1	1		beta-D-xylosidase 4	Phvul.006G208200.1|PACid:27167166	84 kDa	1	8062.6	4688.1	10245	100	14154	8804.4	0.997281
glutathione peroxidase 6	Phvul.002G288700.1|PACid:27169181	26 kDa	1	0.1	0.1	3	0.1	0.1	3	1		Translation initiation factor eIF3 subunit	Phvul.004G141100.1|PACid:27157679	26 kDa	1	100	100	15316	100	100	15421	0.993278
